# Supplementary material for: The Redox-Active Tyrosine Is Essential for Proton Pumping in Cytochrome c Oxidase
Source: PubMed Central journal article supplement (PMC8079940; doi:10.3389/fchem.2021.640155), 2021-04-14
Supplement: datasheet1.pdf [file datasheet1.pdf]

Supplementary material for:

**The redox-active tyrosine is essential for proton pumping in cytochrome c oxidase.**

Margareta R.A. Blomberg\*

Department of Organic Chemistry, Arrhenius Laboratory, Stockholm University, SE-106 91, Stockholm, Sweden.

Contact information for corresponding author:

e-mail: margareta.blomberg@su.se, phone: +46-8-16 26 16

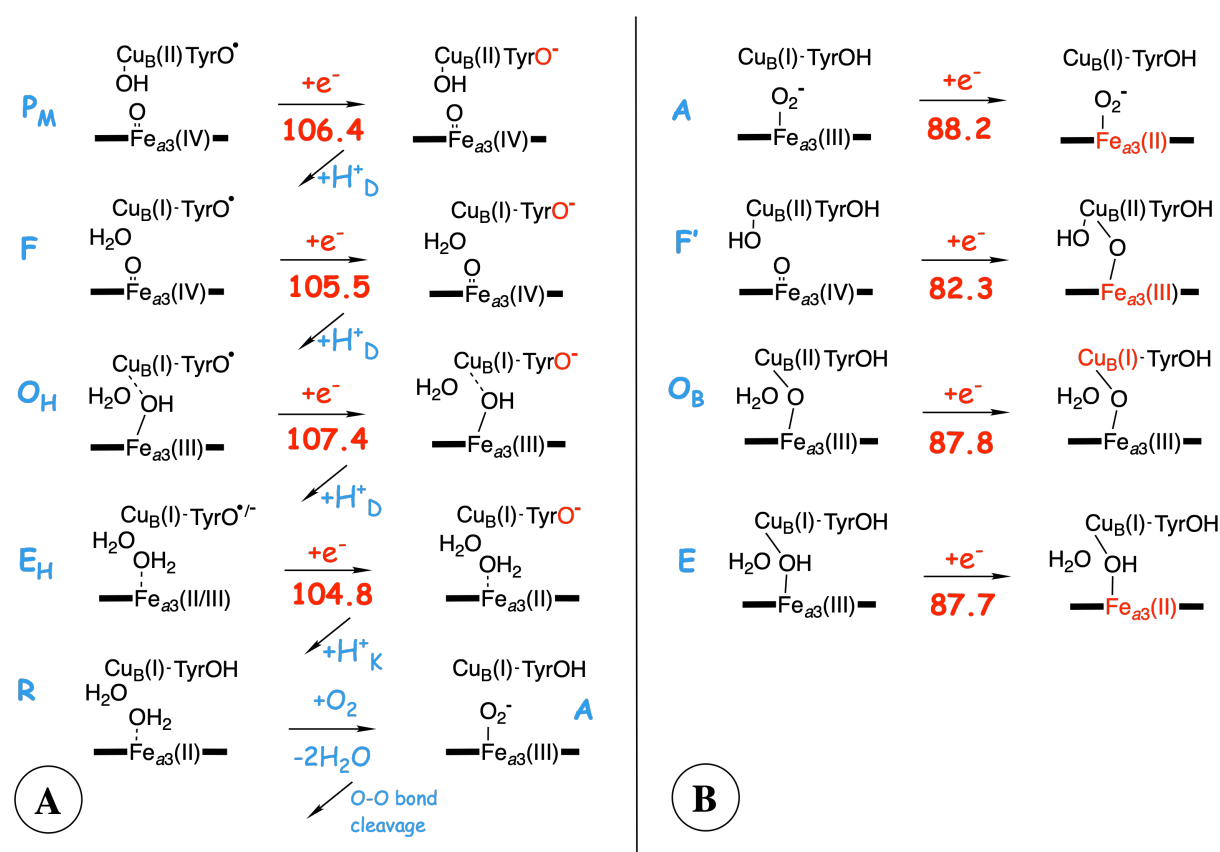

Figure S1. Calculated electron affinities (EA, kcal/mol) of possible intermediates in the catalytic cycle of the A-family CcOs using the B3LYP functional with 20 % exact exchange. **A**. The mechanism for O<sub>2</sub> reduction suggested in Table 2 in the main text with calculated EAs for the intermediates that initiate each of the reduction steps. **B**. Calculated EAs for alternative structures for each reduction step.

Cartesian coordinates for the optimized structures for the CcO intermediates:

**P<sub>M</sub>** (quintet, +1)

|    |               |                |               |
|----|---------------|----------------|---------------|
| C1 | -0.8191010000 | -26.0151710000 | 24.4889340000 |
| C2 | -0.7318120000 | -26.8548640000 | 25.7852190000 |

|      |               |                |               |
|------|---------------|----------------|---------------|
| C3   | -2.0788110000 | -27.4070240000 | 26.1351890000 |
| N4   | -2.4551240000 | -28.7328740000 | 25.9290940000 |
| C5   | -3.1807940000 | -26.7032780000 | 26.5182210000 |
| C6   | -3.7506000000 | -28.8216880000 | 26.1643260000 |
| N7   | -4.2516400000 | -27.5950300000 | 26.5238970000 |
| C8   | -7.7230360000 | -24.0380670000 | 24.0959640000 |
| C9   | -7.5075380000 | -24.0594750000 | 25.6275540000 |
| C10  | -7.2358370000 | -25.4435980000 | 26.1515670000 |
| C11  | -8.2697290000 | -26.3097380000 | 26.6019500000 |
| C12  | -5.9199860000 | -25.9205210000 | 26.1283050000 |
| C13  | -7.9872090000 | -27.5854280000 | 27.0282500000 |
| C14  | -5.5953190000 | -27.1943760000 | 26.5621970000 |
| C15  | -6.6307790000 | -28.0957970000 | 27.0582620000 |
| O16  | -6.3464680000 | -29.2390940000 | 27.4998320000 |
| C17  | 2.9850280000  | -33.3740080000 | 28.0369990000 |
| C18  | 3.1567820000  | -33.5587080000 | 26.5284940000 |
| O19  | 2.6195360000  | -34.4772380000 | 25.9160460000 |
| C20  | 1.4932590000  | -33.6571660000 | 28.3808250000 |
| C21  | 0.4939480000  | -32.7285230000 | 27.7270950000 |
| N22  | -0.4412820000 | -32.0272520000 | 28.4755970000 |
| C23  | 0.2339540000  | -32.3504070000 | 26.4297640000 |
| C24  | -1.1965790000 | -31.2644620000 | 27.6427820000 |
| N25  | -0.7979430000 | -31.4213220000 | 26.3896940000 |
| N26  | 3.8893490000  | -32.5854190000 | 25.9103930000 |
| C27  | 4.2948730000  | -32.6900480000 | 24.5160120000 |
| C28  | 4.1344650000  | -31.3600650000 | 23.7425170000 |
| C29  | 2.7187480000  | -30.9032500000 | 23.6233810000 |
| N30  | 2.0136890000  | -30.8522910000 | 22.4258420000 |
| C31  | 1.8027070000  | -30.5554160000 | 24.5792500000 |
| C32  | 0.7330730000  | -30.4894220000 | 22.6896340000 |
| N33  | 0.5783060000  | -30.3249760000 | 23.9912760000 |
| C34  | -6.9991740000 | -37.1460990000 | 20.0191310000 |
| C35  | -5.7205990000 | -36.9755780000 | 20.8581940000 |
| C36  | -5.7188550000 | -35.7263680000 | 21.6827560000 |
| N37  | -6.7668690000 | -35.3861470000 | 22.5224380000 |
| C38  | -4.8006030000 | -34.7161670000 | 21.8303620000 |
| C39  | -6.4643070000 | -34.2224500000 | 23.1323680000 |
| N40  | -5.2758270000 | -33.7897720000 | 22.7380540000 |
| Cu41 | -1.3301400000 | -30.0763450000 | 24.7506890000 |
| Fe42 | -4.3062650000 | -32.0766410000 | 23.4678820000 |
| C43  | -1.4182790000 | -32.9548720000 | 21.8338180000 |
| C44  | -3.4693250000 | -34.0749820000 | 26.0956100000 |
| C45  | -7.1517580000 | -31.1026360000 | 25.0966990000 |
| C46  | -5.4516440000 | -30.5999160000 | 20.6048700000 |
| N47  | -5.9716680000 | -31.0538160000 | 22.9488620000 |
| C48  | -1.6530390000 | -33.5202370000 | 23.0848500000 |
| C49  | -0.7784630000 | -34.4438250000 | 23.7299390000 |
| C50  | -1.3690110000 | -34.7890510000 | 24.9250090000 |
| C51  | -2.6066680000 | -34.0469060000 | 25.0035530000 |
| C52  | -0.6991980000 | -35.5737760000 | 25.9612330000 |

|      |                |                |               |
|------|----------------|----------------|---------------|
| O53  | -1.0934760000  | -35.7344860000 | 27.1098040000 |
| N54  | -5.1435150000  | -32.4951290000 | 25.2521710000 |
| C55  | -4.6357830000  | -33.3445700000 | 26.2042030000 |
| C56  | -5.5245400000  | -33.4010930000 | 27.3514650000 |
| C57  | -6.5765880000  | -32.5732460000 | 27.0698870000 |
| C58  | -6.3127350000  | -31.9975190000 | 25.7559570000 |
| C59  | -5.2968430000  | -34.2705500000 | 28.5513780000 |
| N60  | -2.7639180000  | -33.3045770000 | 23.8696520000 |
| C61  | -6.9911230000  | -30.6750200000 | 23.7870220000 |
| C62  | -7.9554860000  | -29.8533020000 | 23.0783690000 |
| C63  | -7.5454260000  | -29.8171670000 | 21.7644200000 |
| C64  | -6.2744740000  | -30.5380420000 | 21.7177030000 |
| C65  | -9.1151970000  | -29.1399140000 | 23.7003860000 |
| C66  | -8.1705930000  | -29.1777460000 | 20.6139930000 |
| C67  | -9.4604440000  | -28.8310220000 | 20.4888290000 |
| N68  | -3.5620930000  | -31.7993830000 | 21.6082590000 |
| C69  | -4.1699510000  | -31.1355950000 | 20.5803590000 |
| C70  | -3.2776370000  | -31.0410480000 | 19.4328650000 |
| C71  | -2.1260730000  | -31.6668780000 | 19.8074720000 |
| C72  | -2.3152750000  | -32.1547470000 | 21.1520100000 |
| C73  | -3.5981710000  | -30.3618160000 | 18.1378650000 |
| C74  | -7.8600450000  | -32.4490660000 | 27.8537620000 |
| O75  | -8.4208650000  | -31.1394710000 | 27.8369900000 |
| C76  | -8.9036060000  | -33.4220390000 | 27.2812670000 |
| H77  | 0.1811240000   | -34.7753110000 | 23.3517510000 |
| H78  | -1.2295580000  | -31.8123700000 | 19.2165680000 |
| H79  | -1.2177860000  | -26.6722550000 | 23.7052060000 |
| H80  | -0.0365830000  | -27.6878430000 | 25.6313040000 |
| H81  | -0.3402900000  | -26.2516960000 | 26.6148170000 |
| H82  | -8.5316060000  | -24.7348650000 | 23.8547310000 |
| H83  | -6.6798730000  | -23.3910270000 | 25.8982540000 |
| H84  | -8.4137300000  | -23.6487640000 | 26.0885540000 |
| H85  | 3.6244290000   | -34.0874440000 | 28.5670410000 |
| H86  | 1.2658020000   | -34.6851080000 | 28.0805110000 |
| H87  | 1.3644410000   | -33.6076930000 | 29.4686300000 |
| H88  | 3.6962750000   | -33.4855420000 | 24.0701920000 |
| H89  | 4.7394000000   | -30.5880220000 | 24.2370620000 |
| H90  | 4.5766170000   | -31.4923570000 | 22.7470070000 |
| H91  | -7.8815500000  | -37.2044790000 | 20.6659360000 |
| H92  | -5.5998040000  | -37.8509180000 | 21.5122150000 |
| H93  | -4.8399860000  | -36.9535410000 | 20.2064320000 |
| H94  | -5.9857750000  | -34.0241580000 | 29.3637600000 |
| H95  | -4.2747890000  | -34.1629300000 | 28.9328920000 |
| H96  | -5.4354550000  | -35.3321760000 | 28.3097230000 |
| H97  | -10.0646820000 | -29.6717050000 | 23.5529100000 |
| H98  | -9.2130820000  | -28.1444240000 | 23.2511500000 |
| H99  | -8.9747130000  | -29.0109730000 | 24.7771760000 |
| H100 | -2.7656960000  | -30.4527780000 | 17.4339390000 |
| H101 | -3.7956510000  | -29.2932090000 | 18.2900490000 |
| H102 | -4.4882710000  | -30.7931580000 | 17.6629510000 |

|      |                |                |               |
|------|----------------|----------------|---------------|
| H103 | -7.6555360000  | -32.7445490000 | 28.8954960000 |
| H104 | -8.4843240000  | -34.4328990000 | 27.2376290000 |
| H105 | -9.1741080000  | -33.1105350000 | 26.2662140000 |
| H106 | -9.8097590000  | -33.4560970000 | 27.8942220000 |
| H107 | -0.4837900000  | -33.2053030000 | 21.3419000000 |
| H108 | -5.8027970000  | -30.1378780000 | 19.6908070000 |
| H109 | -7.5178980000  | -28.9764400000 | 19.7665000000 |
| H110 | -10.1978690000 | -29.0169240000 | 21.2613300000 |
| H111 | -9.8173720000  | -28.3468300000 | 19.5852410000 |
| H112 | -8.0223400000  | -30.7704810000 | 25.6443730000 |
| H113 | -3.1710850000  | -34.7093850000 | 26.9203070000 |
| H114 | 0.2743560000   | -35.9974250000 | 25.6418720000 |
| H115 | -7.1059060000  | -33.7226450000 | 23.8404060000 |
| H116 | -7.6353170000  | -35.9105300000 | 22.6581540000 |
| H117 | -3.8379570000  | -34.5918960000 | 21.3596340000 |
| H118 | -0.0589290000  | -30.3364430000 | 21.9729400000 |
| H119 | 2.3979370000   | -31.0252950000 | 21.5077500000 |
| H120 | 1.9381550000   | -30.4901750000 | 25.6454870000 |
| H121 | 4.4024110000   | -31.9373460000 | 26.4936260000 |
| H122 | 0.7095020000   | -32.6940770000 | 25.5292660000 |
| H123 | -0.5801600000  | -32.1608810000 | 29.4667800000 |
| H124 | -1.9921870000  | -30.6113090000 | 27.9668670000 |
| H125 | -4.3594990000  | -29.6985450000 | 26.0204600000 |
| H126 | -3.2980350000  | -25.6696220000 | 26.7979530000 |
| H127 | -5.1463730000  | -25.2820870000 | 25.7198300000 |
| H128 | -8.7640040000  | -28.2600840000 | 27.3754140000 |
| H129 | -9.2959110000  | -25.9516050000 | 26.6031630000 |
| H130 | -7.6859710000  | -30.4957390000 | 27.9132210000 |
| H131 | 3.2712660000   | -32.3595090000 | 28.3144110000 |
| H132 | -1.4217070000  | -25.2220750000 | 24.5787790000 |
| H133 | 0.0891310000   | -25.7121940000 | 24.1996940000 |
| H134 | -8.0231020000  | -23.1344150000 | 23.7901120000 |
| N135 | -6.5976020000  | -24.4875600000 | 23.3015460000 |
| H136 | 5.2636450000   | -32.9382170000 | 24.4989930000 |
| H137 | -7.1328380000  | -36.3013310000 | 19.3341730000 |
| H138 | -6.9519400000  | -38.0659640000 | 19.4266280000 |
| H139 | -4.7461400000  | -24.9910700000 | 21.6805950000 |
| C140 | -5.5860070000  | -25.6409910000 | 21.3980050000 |
| C141 | -6.7881480000  | -25.4043790000 | 22.2880500000 |
| O142 | -7.8358950000  | -26.0253310000 | 22.1495880000 |
| C143 | -5.1407380000  | -27.1217190000 | 21.4735810000 |
| C144 | -3.8242780000  | -27.3276960000 | 20.7164440000 |
| C145 | -5.0299080000  | -27.6096380000 | 22.9231950000 |
| H146 | -5.7806430000  | -23.8946590000 | 23.2489110000 |
| H147 | -5.8654490000  | -25.3893240000 | 20.3683050000 |
| H148 | -5.9270080000  | -27.7077010000 | 20.9889530000 |
| H149 | -3.0086690000  | -26.7638050000 | 21.1857150000 |
| H150 | -3.9059000000  | -27.0018580000 | 19.6712970000 |
| H151 | -3.5317540000  | -28.3824230000 | 20.7277370000 |
| H152 | -5.9871730000  | -27.5348030000 | 23.4469090000 |

|      |                |                |               |
|------|----------------|----------------|---------------|
| H153 | -4.2801500000  | -27.0284400000 | 23.4773860000 |
| H154 | -4.7177190000  | -28.6568470000 | 22.9606510000 |
| H155 | -2.6175460000  | -29.3088360000 | 23.0285510000 |
| C156 | -11.0219730000 | -37.0394970000 | 21.4210620000 |
| C157 | -10.4093520000 | -36.6286540000 | 22.7379150000 |
| O158 | -9.1936320000  | -36.6823390000 | 22.9559940000 |
| N159 | -11.2737430000 | -36.1700520000 | 23.6690030000 |
| C160 | -10.8109980000 | -35.7070350000 | 24.9628930000 |
| H161 | -10.3487360000 | -37.7314340000 | 20.9122120000 |
| H162 | -11.1579520000 | -36.1590460000 | 20.7816160000 |
| H163 | -12.2637960000 | -36.1796680000 | 23.4726300000 |
| H164 | -10.0055510000 | -34.9778250000 | 24.8373050000 |
| H165 | -11.6400640000 | -35.2313420000 | 25.4908520000 |
| H166 | -11.9911560000 | -37.5204390000 | 21.5567630000 |
| H167 | -10.4290930000 | -36.5298650000 | 25.5672450000 |
| O168 | -1.6788900000  | -29.0929490000 | 23.1490650000 |
| O169 | -3.5246910000  | -30.7843700000 | 24.0992850000 |

**P<sub>R</sub>** (quartet, 0)

|     |               |                |               |
|-----|---------------|----------------|---------------|
| C1  | -0.8191110000 | -26.0151750000 | 24.4889560000 |
| C2  | -0.7469680000 | -26.8636260000 | 25.7834800000 |
| C3  | -2.0878480000 | -27.4442580000 | 26.1286910000 |
| N4  | -2.4537410000 | -28.7609480000 | 25.8851510000 |
| C5  | -3.1999460000 | -26.7716310000 | 26.5533680000 |
| C6  | -3.7638100000 | -28.8592550000 | 26.1287060000 |
| N7  | -4.2622240000 | -27.6639480000 | 26.5225640000 |
| C8  | -7.7229950000 | -24.0380710000 | 24.0959380000 |
| C9  | -7.4670870000 | -24.0757690000 | 25.6144260000 |
| C10 | -7.2209780000 | -25.4622670000 | 26.1607150000 |
| C11 | -8.2363650000 | -26.3123130000 | 26.6349090000 |
| C12 | -5.9301750000 | -25.9807830000 | 26.1443790000 |
| C13 | -7.9635510000 | -27.6052110000 | 27.0691680000 |
| C14 | -5.6343170000 | -27.2650510000 | 26.5942900000 |
| C15 | -6.6432940000 | -28.1697160000 | 27.0718060000 |
| O16 | -6.3742170000 | -29.3695200000 | 27.4519390000 |
| C17 | 2.9850370000  | -33.3740040000 | 28.0369910000 |
| C18 | 3.1858580000  | -33.5788420000 | 26.5360320000 |
| O19 | 2.7168280000  | -34.5434040000 | 25.9396290000 |
| C20 | 1.4927630000  | -33.6572530000 | 28.3745120000 |
| C21 | 0.4985960000  | -32.7225380000 | 27.7265260000 |
| N22 | -0.4414920000 | -32.0259820000 | 28.4741820000 |
| C23 | 0.2467500000  | -32.3401450000 | 26.4297580000 |
| C24 | -1.1935870000 | -31.2611680000 | 27.6355290000 |
| N25 | -0.7857210000 | -31.4138280000 | 26.3857380000 |
| N26 | 3.8785490000  | -32.5835880000 | 25.9057250000 |
| C27 | 4.2948500000  | -32.6900560000 | 24.5160180000 |
| C28 | 4.1201060000  | -31.3704800000 | 23.7302950000 |
| C29 | 2.6982250000  | -30.9370060000 | 23.5990260000 |
| N30 | 1.9782580000  | -30.9602380000 | 22.4091210000 |

|      |               |                |               |
|------|---------------|----------------|---------------|
| C31  | 1.7870140000  | -30.5553670000 | 24.5471100000 |
| C32  | 0.6948540000  | -30.5999550000 | 22.6730060000 |
| N33  | 0.5540790000  | -30.3717120000 | 23.9648300000 |
| C34  | -7.0641690000 | -37.2475660000 | 20.0469420000 |
| C35  | -5.7671940000 | -37.0602490000 | 20.8535400000 |
| C36  | -5.7551620000 | -35.8045460000 | 21.6675240000 |
| N37  | -6.7795690000 | -35.4690740000 | 22.5385670000 |
| C38  | -4.8457590000 | -34.7813380000 | 21.7748930000 |
| C39  | -6.4679050000 | -34.2934490000 | 23.1264080000 |
| N40  | -5.3007300000 | -33.8521730000 | 22.6870800000 |
| Cu41 | -1.3571010000 | -30.0430970000 | 24.7238200000 |
| Fe42 | -4.3050360000 | -32.1240040000 | 23.3905530000 |
| C43  | -1.4228370000 | -33.0485610000 | 21.7754610000 |
| C44  | -3.5004540000 | -34.0904010000 | 26.0487380000 |
| C45  | -7.1116340000 | -31.0449620000 | 25.0204520000 |
| C46  | -5.4500160000 | -30.7038080000 | 20.5020010000 |
| N47  | -5.9513550000 | -31.0850960000 | 22.8617500000 |
| C48  | -1.6555940000 | -33.5812680000 | 23.0439220000 |
| C49  | -0.7720040000 | -34.4667320000 | 23.7223240000 |
| C50  | -1.3690100000 | -34.7890740000 | 24.9249940000 |
| C51  | -2.6207000000 | -34.0715520000 | 24.9681430000 |
| C52  | -0.6958220000 | -35.5397800000 | 25.9774460000 |
| O53  | -1.1001220000 | -35.7216300000 | 27.1214980000 |
| N54  | -5.1560450000 | -32.5077250000 | 25.1754630000 |
| C55  | -4.6674520000 | -33.3590350000 | 26.1370280000 |
| C56  | -5.5658120000 | -33.3925090000 | 27.2782820000 |
| C57  | -6.5973580000 | -32.5428120000 | 26.9908710000 |
| C58  | -6.3110170000 | -31.9752450000 | 25.6777040000 |
| C59  | -5.3611520000 | -34.2529410000 | 28.4889490000 |
| N60  | -2.7771380000 | -33.3629150000 | 23.8140180000 |
| C61  | -6.9378430000 | -30.6388440000 | 23.7081490000 |
| C62  | -7.8732640000 | -29.7842980000 | 22.9978560000 |
| C63  | -7.4958070000 | -29.8167950000 | 21.6741120000 |
| C64  | -6.2553120000 | -30.5899490000 | 21.6237350000 |
| C65  | -8.9577350000 | -28.9712720000 | 23.6345020000 |
| C66  | -8.1173970000 | -29.1844230000 | 20.5179120000 |
| C67  | -9.3891440000 | -28.7701850000 | 20.4160370000 |
| N68  | -3.5671870000 | -31.9003010000 | 21.5211660000 |
| C69  | -4.1742940000 | -31.2553670000 | 20.4825840000 |
| C70  | -3.2828950000 | -31.1877860000 | 19.3331740000 |
| C71  | -2.1331730000 | -31.8117070000 | 19.7168220000 |
| C72  | -2.3208120000 | -32.2697750000 | 21.0723930000 |
| C73  | -3.5995020000 | -30.5231780000 | 18.0293960000 |
| C74  | -7.8751870000 | -32.3686330000 | 27.7841510000 |
| O75  | -8.4189310000 | -31.0697520000 | 27.7285840000 |
| C76  | -8.9207960000 | -33.3770830000 | 27.2530420000 |
| H77  | 0.1971480000  | -34.7926030000 | 23.3635540000 |
| H78  | -1.2367090000 | -31.9688050000 | 19.1280980000 |
| H79  | -1.2154980000 | -26.6713220000 | 23.7033250000 |
| H80  | -0.0343980000 | -27.6841510000 | 25.6325420000 |

|      |                |                |               |
|------|----------------|----------------|---------------|
| H81  | -0.3691690000  | -26.2583830000 | 26.6192800000 |
| H82  | -8.5438660000  | -24.7279780000 | 23.8744180000 |
| H83  | -6.6182730000  | -23.4183330000 | 25.8582310000 |
| H84  | -8.3463340000  | -23.6238650000 | 26.0940070000 |
| H85  | 3.6206970000   | -34.0839650000 | 28.5775720000 |
| H86  | 1.2658360000   | -34.6844600000 | 28.0701410000 |
| H87  | 1.3638700000   | -33.6140860000 | 29.4628410000 |
| H88  | 3.7027810000   | -33.4929730000 | 24.0729870000 |
| H89  | 4.7100470000   | -30.5837610000 | 24.2209280000 |
| H90  | 4.5719320000   | -31.5062560000 | 22.7391800000 |
| H91  | -7.9280870000  | -37.3097190000 | 20.7176270000 |
| H92  | -5.6235520000  | -37.9318730000 | 21.5086120000 |
| H93  | -4.9031370000  | -37.0352750000 | 20.1798310000 |
| H94  | -6.0294130000  | -33.9588050000 | 29.3031430000 |
| H95  | -4.3308220000  | -34.1838800000 | 28.8577610000 |
| H96  | -5.5505280000  | -35.3123890000 | 28.2703000000 |
| H97  | -9.9390260000  | -29.4631160000 | 23.5793460000 |
| H98  | -9.0331120000  | -28.0035100000 | 23.1243880000 |
| H99  | -8.7394820000  | -28.7719020000 | 24.6875740000 |
| H100 | -2.7707000000  | -30.6345420000 | 17.3231530000 |
| H101 | -3.7832870000  | -29.4499510000 | 18.1675610000 |
| H102 | -4.4978790000  | -30.9479920000 | 17.5635950000 |
| H103 | -7.6524070000  | -32.6434100000 | 28.8311370000 |
| H104 | -8.4758370000  | -34.3765340000 | 27.1784880000 |
| H105 | -9.2398480000  | -33.0610010000 | 26.2529620000 |
| H106 | -9.8097420000  | -33.4560700000 | 27.8942260000 |
| H107 | -0.4847690000  | -33.3062060000 | 21.2930720000 |
| H108 | -5.8017150000  | -30.2565380000 | 19.5807300000 |
| H109 | -7.4762950000  | -29.0421980000 | 19.6492060000 |
| H110 | -10.1087940000 | -28.8845880000 | 21.2186570000 |
| H111 | -9.7427780000  | -28.2861560000 | 19.5107210000 |
| H112 | -7.9501200000  | -30.6542640000 | 25.5782150000 |
| H113 | -3.2083720000  | -34.7112310000 | 26.8860680000 |
| H114 | 0.3010650000   | -35.9255030000 | 25.6767060000 |
| H115 | -7.0888590000  | -33.7920190000 | 23.8518070000 |
| H116 | -7.6336000000  | -36.0031620000 | 22.7087800000 |
| H117 | -3.9001580000  | -34.6483840000 | 21.2725390000 |
| H118 | -0.1048520000  | -30.4875720000 | 21.9570310000 |
| H119 | 2.3525760000   | -31.1727180000 | 21.4958020000 |
| H120 | 1.9297390000   | -30.4370140000 | 25.6084540000 |
| H121 | 4.3199020000   | -31.8737910000 | 26.4745390000 |
| H122 | 0.7241760000   | -32.6844560000 | 25.5297580000 |
| H123 | -0.5801600000  | -32.1608850000 | 29.4667780000 |
| H124 | -1.9948590000  | -30.6087040000 | 27.9497810000 |
| H125 | -4.3725470000  | -29.7367730000 | 25.9934560000 |
| H126 | -3.3304950000  | -25.7495440000 | 26.8678820000 |
| H127 | -5.1307820000  | -25.3725450000 | 25.7307360000 |
| H128 | -8.7652900000  | -28.2406560000 | 27.4382650000 |
| H129 | -9.2647690000  | -25.9519540000 | 26.6592600000 |
| H130 | -7.6629160000  | -30.4014050000 | 27.7387520000 |

|      |                |                |               |
|------|----------------|----------------|---------------|
| H131 | 3.2712640000   | -32.3595090000 | 28.3144190000 |
| H132 | -1.4217120000  | -25.2220610000 | 24.5787770000 |
| H133 | 0.0891380000   | -25.7122000000 | 24.1996970000 |
| H134 | -8.0231300000  | -23.1344180000 | 23.7901000000 |
| N135 | -6.6237130000  | -24.4948390000 | 23.2708780000 |
| H136 | 5.2636490000   | -32.9382130000 | 24.4989890000 |
| H137 | -7.2230010000  | -36.4061510000 | 19.3631530000 |
| H138 | -7.0251090000  | -38.1700020000 | 19.4567010000 |
| H139 | -4.7319150000  | -25.0266150000 | 21.7184160000 |
| C140 | -5.5860210000  | -25.6409800000 | 21.3980580000 |
| C141 | -6.8215520000  | -25.3431130000 | 22.2198120000 |
| O142 | -7.9106400000  | -25.8481040000 | 21.9535830000 |
| C143 | -5.1974750000  | -27.1344050000 | 21.4757710000 |
| C144 | -3.9280740000  | -27.4059260000 | 20.6584700000 |
| C145 | -5.0299200000  | -27.6096500000 | 22.9231680000 |
| H146 | -5.7030990000  | -24.1082120000 | 23.4176060000 |
| H147 | -5.8063850000  | -25.3749770000 | 20.3569010000 |
| H148 | -6.0290930000  | -27.6910610000 | 21.0351300000 |
| H149 | -3.0707440000  | -26.8584980000 | 21.0712050000 |
| H150 | -4.0500640000  | -27.1033230000 | 19.6094060000 |
| H151 | -3.6731080000  | -28.4706670000 | 20.6817910000 |
| H152 | -5.9404980000  | -27.4698600000 | 23.5124930000 |
| H153 | -4.2199580000  | -27.0630260000 | 23.4262680000 |
| H154 | -4.7764620000  | -28.6738400000 | 22.9595780000 |
| H155 | -2.5809360000  | -29.0222660000 | 23.0222380000 |
| C156 | -11.0219660000 | -37.0394970000 | 21.4210660000 |
| C157 | -10.4099700000 | -36.6713870000 | 22.7532600000 |
| O158 | -9.2065080000  | -36.8032490000 | 22.9985960000 |
| N159 | -11.2700360000 | -36.1714440000 | 23.6674860000 |
| C160 | -10.8109890000 | -35.7070350000 | 24.9628890000 |
| H161 | -10.3540210000 | -37.7213060000 | 20.8926300000 |
| H162 | -11.1602560000 | -36.1417880000 | 20.8072910000 |
| H163 | -12.2464990000 | -36.0816540000 | 23.4287240000 |
| H164 | -10.0073020000 | -34.9735830000 | 24.8475550000 |
| H165 | -11.6431590000 | -35.2349510000 | 25.4887330000 |
| H166 | -11.9911550000 | -37.5204390000 | 21.5567610000 |
| H167 | -10.4290950000 | -36.5298650000 | 25.5672470000 |
| O168 | -1.6140350000  | -29.0519470000 | 23.1109750000 |
| O169 | -3.4903530000  | -30.8432640000 | 23.9931220000 |

F (quartet, +1)

|    |               |                |               |
|----|---------------|----------------|---------------|
| C1 | -0.8188990000 | -26.0151840000 | 24.4889260000 |
| C2 | -0.7531820000 | -26.9175050000 | 25.7407610000 |
| C3 | -2.1082020000 | -27.4822100000 | 26.0258370000 |
| N4 | -2.5161210000 | -28.7459640000 | 25.5997070000 |
| C5 | -3.1891000000 | -26.8153930000 | 26.5227760000 |
| C6 | -3.8115820000 | -28.8360810000 | 25.8390660000 |
| N7 | -4.2799630000 | -27.6701240000 | 26.3997610000 |



|      |               |                |               |
|------|---------------|----------------|---------------|
| C8   | -7.7228760000 | -24.0381160000 | 24.0959510000 |
| C9   | -7.4951290000 | -24.0629690000 | 25.6228770000 |
| C10  | -7.2305500000 | -25.4595170000 | 26.1106680000 |
| C11  | -8.2838560000 | -26.3545070000 | 26.4430080000 |
| C12  | -5.9139640000 | -25.9313350000 | 26.1173970000 |
| C13  | -8.0217090000 | -27.6563400000 | 26.7948190000 |
| C14  | -5.6146360000 | -27.2393020000 | 26.4576720000 |
| C15  | -6.6664840000 | -28.1627900000 | 26.8587890000 |
| O16  | -6.3894180000 | -29.3281920000 | 27.2534500000 |
| C17  | 2.9851550000  | -33.3739550000 | 28.0369400000 |
| C18  | 3.1650900000  | -33.5764470000 | 26.5345900000 |
| O19  | 2.6517560000  | -34.5174520000 | 25.9341930000 |
| C20  | 1.5192180000  | -33.6790890000 | 28.4229970000 |
| C21  | 0.5056550000  | -32.7907070000 | 27.7523330000 |
| N22  | -0.4656460000 | -32.1134450000 | 28.4699250000 |
| C23  | 0.2359760000  | -32.4735760000 | 26.4406150000 |
| C24  | -1.2625280000 | -31.4358630000 | 27.6051480000 |
| N25  | -0.8551540000 | -31.6276890000 | 26.3637430000 |
| N26  | 3.8826460000  | -32.5985370000 | 25.9108070000 |
| C27  | 4.2946970000  | -32.6899570000 | 24.5164130000 |
| C28  | 4.0543140000  | -31.3603820000 | 23.7643530000 |
| C29  | 2.6102630000  | -30.9902080000 | 23.5885830000 |
| N30  | 1.9478300000  | -31.0931840000 | 22.3715480000 |
| C31  | 1.6476350000  | -30.5410000000 | 24.4587480000 |
| C32  | 0.6518220000  | -30.7201210000 | 22.5427020000 |
| N33  | 0.4344600000  | -30.3862250000 | 23.8056030000 |
| C34  | -6.9089040000 | -37.4395830000 | 20.1289580000 |
| C35  | -5.6752770000 | -37.2140770000 | 21.0206660000 |
| C36  | -5.6855430000 | -35.8891530000 | 21.7169130000 |
| N37  | -6.7652330000 | -35.4499020000 | 22.4642330000 |
| C38  | -4.7541620000 | -34.8856620000 | 21.8078690000 |
| C39  | -6.4639560000 | -34.2406460000 | 22.9779660000 |
| N40  | -5.2503110000 | -33.8677480000 | 22.5980680000 |
| Cu41 | -1.4550940000 | -30.3687590000 | 24.7794210000 |
| Fe42 | -4.2364050000 | -32.1513560000 | 23.2453370000 |
| C43  | -1.3864020000 | -33.2514690000 | 21.6800040000 |
| C44  | -3.4896130000 | -34.0080410000 | 25.9949470000 |
| C45  | -7.1259210000 | -31.0597440000 | 24.7748780000 |
| C46  | -5.3071990000 | -30.7957020000 | 20.2996810000 |
| N47  | -5.8631070000 | -31.1049820000 | 22.6694090000 |
| C48  | -1.6298660000 | -33.6895870000 | 22.9782490000 |
| C49  | -0.7667750000 | -34.5572240000 | 23.7106270000 |
| C50  | -1.3690250000 | -34.7890470000 | 24.9250200000 |
| C51  | -2.6018830000 | -34.0409620000 | 24.9261740000 |
| C52  | -0.7319540000 | -35.5225180000 | 26.0193100000 |
| O53  | -1.1481820000 | -35.6112250000 | 27.1675400000 |
| N54  | -5.1289440000 | -32.4488450000 | 25.0453380000 |
| C55  | -4.6609740000 | -33.2802730000 | 26.0356080000 |
| C56  | -5.5911350000 | -33.3148570000 | 27.1461450000 |
| C57  | -6.6437420000 | -32.5087130000 | 26.8047620000 |

|      |               |                |               |
|------|---------------|----------------|---------------|
| C58  | -6.3248350000 | -31.9480970000 | 25.4935610000 |
| C59  | -5.4050950000 | -34.1504210000 | 28.3772140000 |
| N60  | -2.7453940000 | -33.4000890000 | 23.7323720000 |
| C61  | -6.9069480000 | -30.6749530000 | 23.4596250000 |
| C62  | -7.8470550000 | -29.8881800000 | 22.6733840000 |
| C63  | -7.3939700000 | -29.9317090000 | 21.3747840000 |
| C64  | -6.1368470000 | -30.6650980000 | 21.4021990000 |
| C65  | -9.0638220000 | -29.1926190000 | 23.1936720000 |
| C66  | -8.0125270000 | -29.4402200000 | 20.1404300000 |
| C67  | -8.6209550000 | -28.2568590000 | 19.9705720000 |
| N68  | -3.4842050000 | -32.0345840000 | 21.3685300000 |
| C69  | -4.0561050000 | -31.3949340000 | 20.3026030000 |
| C70  | -3.1645300000 | -31.4203000000 | 19.1544820000 |
| C71  | -2.0516590000 | -32.0922700000 | 19.5627610000 |
| C72  | -2.2598190000 | -32.4852560000 | 20.9330310000 |
| C73  | -3.4448040000 | -30.7886410000 | 17.8270800000 |
| C74  | -7.9231590000 | -32.3587880000 | 27.6054710000 |
| O75  | -8.5307360000 | -31.0793880000 | 27.4801560000 |
| C76  | -8.9586340000 | -33.4200520000 | 27.1990300000 |
| H77  | 0.1917240000  | -34.9302560000 | 23.3705520000 |
| H78  | -1.1643090000 | -32.3180690000 | 18.9839710000 |
| H79  | -1.2223350000 | -26.6155240000 | 23.6592390000 |
| H80  | -0.0550090000 | -27.7434200000 | 25.5595820000 |
| H81  | -0.3803180000 | -26.3517930000 | 26.6033690000 |
| H82  | -8.5284420000 | -24.7371940000 | 23.8538040000 |
| H83  | -6.6612020000 | -23.4026620000 | 25.8926930000 |
| H84  | -8.3956020000 | -23.6534630000 | 26.0962050000 |
| H85  | 3.6484310000  | -34.0733410000 | 28.5593510000 |
| H86  | 1.3025360000  | -34.7201390000 | 28.1589910000 |
| H87  | 1.4110450000  | -33.5978200000 | 29.5110020000 |
| H88  | 3.7116110000  | -33.5008130000 | 24.0739290000 |
| H89  | 4.5748500000  | -30.5545810000 | 24.2985130000 |
| H90  | 4.5418290000  | -31.4267690000 | 22.7832280000 |
| H91  | -7.8281530000 | -37.4025990000 | 20.7237680000 |
| H92  | -5.6157880000 | -38.0220340000 | 21.7636260000 |
| H93  | -4.7595270000 | -37.2775230000 | 20.4227390000 |
| H94  | -6.0848920000 | -33.8448980000 | 29.1774790000 |
| H95  | -4.3812050000 | -34.0764690000 | 28.7605290000 |
| H96  | -5.5935190000 | -35.2122990000 | 28.1735690000 |
| H97  | -9.8051770000 | -29.0859660000 | 22.3956510000 |
| H98  | -8.8175280000 | -28.1762030000 | 23.5298180000 |
| H99  | -9.5256050000 | -29.7280370000 | 24.0301320000 |
| H100 | -2.6225280000 | -30.9688070000 | 17.1284730000 |
| H101 | -3.5718180000 | -29.7030640000 | 17.9260200000 |
| H102 | -4.3630750000 | -31.1831210000 | 17.3744720000 |
| H103 | -7.6649430000 | -32.5321460000 | 28.6629120000 |
| H104 | -8.4953570000 | -34.4122580000 | 27.1815110000 |
| H105 | -9.3322080000 | -33.1912270000 | 26.1949880000 |
| H106 | -9.8097510000 | -33.4560930000 | 27.8942200000 |
| H107 | -0.4601510000 | -33.5692480000 | 21.2123110000 |

|      |                |                |               |
|------|----------------|----------------|---------------|
| H108 | -5.6380170000  | -30.3421730000 | 19.3730050000 |
| H109 | -7.9653540000  | -30.1293410000 | 19.2961060000 |
| H110 | -8.6281960000  | -27.4955560000 | 20.7424180000 |
| H111 | -9.0781780000  | -28.0073720000 | 19.0162280000 |
| H112 | -8.0126260000  | -30.7010590000 | 25.2781640000 |
| H113 | -3.2135480000  | -34.6024360000 | 26.8561920000 |
| H114 | 0.2386430000   | -35.9825360000 | 25.7416860000 |
| H115 | -7.1269380000  | -33.6640590000 | 23.6032030000 |
| H116 | -7.6482690000  | -35.9474600000 | 22.6125760000 |
| H117 | -3.7700030000  | -34.8256110000 | 21.3727530000 |
| H118 | -0.0884020000  | -30.6735270000 | 21.7579400000 |
| H119 | 2.3692480000   | -31.3570140000 | 21.4922030000 |
| H120 | 1.7348350000   | -30.3589210000 | 25.5182570000 |
| H121 | 4.3458050000   | -31.9082740000 | 26.4860840000 |
| H122 | 0.7371130000   | -32.8127560000 | 25.5508020000 |
| H123 | -0.5801650000  | -32.1608660000 | 29.4666540000 |
| H124 | -2.0977030000  | -30.8198810000 | 27.9032340000 |
| H125 | -4.4432500000  | -29.6730160000 | 25.5852570000 |
| H126 | -3.2826810000  | -25.8340990000 | 26.9593350000 |
| H127 | -5.1208260000  | -25.2702060000 | 25.7888570000 |
| H128 | -8.8166580000  | -28.3508070000 | 27.0488010000 |
| H129 | -9.3100530000  | -25.9975280000 | 26.4083750000 |
| H130 | -7.8081160000  | -30.4222930000 | 27.5741370000 |
| H131 | 3.2712160000   | -32.3595430000 | 28.3144170000 |
| H132 | -1.4218130000  | -25.2221620000 | 24.5787930000 |
| H133 | 0.0891040000   | -25.7121280000 | 24.1996800000 |
| H134 | -8.0232120000  | -23.1344050000 | 23.7901190000 |
| N135 | -6.5918550000  | -24.4708100000 | 23.3001460000 |
| H136 | 5.2636590000   | -32.9382820000 | 24.4987580000 |
| H137 | -6.9744310000  | -36.6711040000 | 19.3508070000 |
| H138 | -6.8592620000  | -38.4192500000 | 19.6421360000 |
| H139 | -4.7274330000  | -25.0180890000 | 21.6835290000 |
| C140 | -5.5860080000  | -25.6409890000 | 21.3980450000 |
| C141 | -6.7783170000  | -25.3813900000 | 22.2914240000 |
| O142 | -7.8352700000  | -25.9985100000 | 22.1709420000 |
| C143 | -5.2015960000  | -27.1346870000 | 21.4681800000 |
| C144 | -3.9594140000  | -27.3801770000 | 20.6085470000 |
| C145 | -5.0299260000  | -27.6096270000 | 22.9231740000 |
| H146 | -5.7720740000  | -23.8818170000 | 23.2620330000 |
| H147 | -5.8619200000  | -25.3784960000 | 20.3700290000 |
| H148 | -6.0385400000  | -27.6945690000 | 21.0399270000 |
| H149 | -3.0976410000  | -26.8147260000 | 20.9908830000 |
| H150 | -4.1327160000  | -27.0560400000 | 19.5741460000 |
| H151 | -3.6712670000  | -28.4327530000 | 20.6070460000 |
| H152 | -5.9710450000  | -27.5464920000 | 23.4766160000 |
| H153 | -4.2792250000  | -27.0029660000 | 23.4515800000 |
| H154 | -4.6897700000  | -28.6497000000 | 22.9507710000 |
| H155 | -2.5510860000  | -30.0143680000 | 22.3420450000 |
| C156 | -11.0219960000 | -37.0395360000 | 21.4210530000 |
| C157 | -10.4146340000 | -36.6267590000 | 22.7396760000 |

|      |                |                |               |
|------|----------------|----------------|---------------|
| O158 | -9.1985140000  | -36.6708720000 | 22.9608080000 |
| N159 | -11.2798070000 | -36.1712070000 | 23.6709060000 |
| C160 | -10.8109980000 | -35.7070310000 | 24.9628980000 |
| H161 | -10.3479130000 | -37.7328380000 | 20.9153210000 |
| H162 | -11.1574140000 | -36.1604270000 | 20.7804070000 |
| H163 | -12.2713830000 | -36.2017710000 | 23.4848520000 |
| H164 | -10.0014270000 | -34.9850390000 | 24.8287980000 |
| H165 | -11.6350210000 | -35.2236060000 | 25.4913270000 |
| H166 | -11.9911380000 | -37.5204050000 | 21.5567650000 |
| H167 | -10.4290920000 | -36.5298690000 | 25.5672450000 |
| O168 | -1.9325010000  | -29.4396630000 | 21.8427750000 |
| O169 | -3.3490230000  | -30.8580250000 | 23.7656170000 |
| H170 | -1.7742300000  | -28.7042310000 | 22.4546640000 |

$F_R$  (triplet, 0)

|     |               |                |               |
|-----|---------------|----------------|---------------|
| C1  | -0.8189080000 | -26.0151940000 | 24.4889470000 |
| C2  | -0.7712890000 | -26.9253600000 | 25.7368110000 |
| C3  | -2.1230800000 | -27.5035060000 | 26.0251560000 |
| N4  | -2.5201200000 | -28.7645400000 | 25.6045280000 |
| C5  | -3.2146610000 | -26.8545020000 | 26.5363100000 |
| C6  | -3.8281730000 | -28.8565250000 | 25.8526740000 |
| N7  | -4.2959340000 | -27.7093890000 | 26.4040030000 |
| C8  | -7.7228220000 | -24.0381360000 | 24.0959190000 |
| C9  | -7.4605870000 | -24.0638100000 | 25.6119020000 |
| C10 | -7.2212800000 | -25.4537680000 | 26.1420360000 |
| C11 | -8.2532000000 | -26.3162770000 | 26.5542870000 |
| C12 | -5.9337880000 | -25.9790190000 | 26.1203650000 |
| C13 | -7.9987040000 | -27.6281430000 | 26.9331280000 |
| C14 | -5.6593820000 | -27.2872330000 | 26.5080130000 |
| C15 | -6.6821690000 | -28.1987740000 | 26.9326820000 |
| O16 | -6.4277860000 | -29.4156060000 | 27.2662240000 |
| C17 | 2.9851480000  | -33.3739510000 | 28.0369260000 |
| C18 | 3.1811510000  | -33.5880970000 | 26.5387020000 |
| O19 | 2.7220730000  | -34.5628660000 | 25.9502770000 |
| C20 | 1.5208670000  | -33.6829760000 | 28.4228820000 |
| C21 | 0.5051520000  | -32.7984310000 | 27.7548240000 |
| N22 | -0.4737280000 | -32.1260490000 | 28.4679220000 |
| C23 | 0.2376730000  | -32.4908710000 | 26.4421980000 |
| C24 | -1.2745790000 | -31.4594760000 | 27.5938910000 |
| N25 | -0.8592130000 | -31.6557790000 | 26.3568820000 |
| N26 | 3.8793530000  | -32.5994450000 | 25.9085640000 |
| C27 | 4.2946820000  | -32.6899450000 | 24.5164260000 |
| C28 | 4.0460990000  | -31.3675610000 | 23.7540110000 |
| C29 | 2.6006490000  | -30.9960690000 | 23.5918900000 |
| N30 | 1.9261090000  | -31.0867860000 | 22.3791450000 |
| C31 | 1.6471680000  | -30.5544240000 | 24.4756090000 |
| C32 | 0.6337990000  | -30.7052610000 | 22.5678620000 |
| N33 | 0.4309740000  | -30.3894980000 | 23.8362870000 |

|      |               |                |               |
|------|---------------|----------------|---------------|
| C34  | -6.9820530000 | -37.4807820000 | 20.1585670000 |
| C35  | -5.7229640000 | -37.2536810000 | 21.0135480000 |
| C36  | -5.7223710000 | -35.9362600000 | 21.7235220000 |
| N37  | -6.7788090000 | -35.5150720000 | 22.5152800000 |
| C38  | -4.7984240000 | -34.9232640000 | 21.7918680000 |
| C39  | -6.4725760000 | -34.3016170000 | 23.0222720000 |
| N40  | -5.2776280000 | -33.9163090000 | 22.6044980000 |
| Cu41 | -1.4680490000 | -30.3247390000 | 24.7854290000 |
| Fe42 | -4.2495970000 | -32.1826970000 | 23.2321000000 |
| C43  | -1.3896280000 | -33.2575910000 | 21.6706280000 |
| C44  | -3.5223700000 | -34.0647200000 | 25.9677870000 |
| C45  | -7.0916750000 | -31.0280170000 | 24.7858240000 |
| C46  | -5.3558770000 | -30.8764230000 | 20.2786310000 |
| N47  | -5.8711620000 | -31.1339800000 | 22.6611800000 |
| C48  | -1.6265520000 | -33.6918750000 | 22.9750580000 |
| C49  | -0.7510500000 | -34.5320090000 | 23.7183110000 |
| C50  | -1.3690350000 | -34.7890620000 | 24.9250180000 |
| C51  | -2.6213080000 | -34.0797460000 | 24.9077380000 |
| C52  | -0.7307480000 | -35.5190200000 | 26.0148260000 |
| O53  | -1.1874040000 | -35.7091600000 | 27.1369420000 |
| N54  | -5.1359200000 | -32.4762190000 | 25.0282190000 |
| C55  | -4.6863820000 | -33.3273660000 | 26.0098230000 |
| C56  | -5.6224790000 | -33.3574100000 | 27.1165600000 |
| C57  | -6.6479290000 | -32.5124970000 | 26.7915340000 |
| C58  | -6.3146940000 | -31.9481370000 | 25.4863130000 |
| C59  | -5.4570200000 | -34.2076840000 | 28.3406330000 |
| N60  | -2.7576910000 | -33.4306300000 | 23.7173690000 |
| C61  | -6.8782120000 | -30.6548580000 | 23.4693240000 |
| C62  | -7.8043250000 | -29.8394780000 | 22.6963810000 |
| C63  | -7.3930890000 | -29.9296820000 | 21.3870750000 |
| C64  | -6.1592830000 | -30.7054730000 | 21.3949760000 |
| C65  | -8.9608140000 | -29.0646420000 | 23.2414320000 |
| C66  | -8.0310660000 | -29.4319590000 | 20.1684270000 |
| C67  | -8.6836160000 | -28.2684080000 | 20.0283910000 |
| N68  | -3.5145630000 | -32.0902940000 | 21.3455450000 |
| C69  | -4.1040270000 | -31.4769210000 | 20.2759670000 |
| C70  | -3.2199730000 | -31.5094110000 | 19.1220650000 |
| C71  | -2.0927880000 | -32.1562270000 | 19.5326820000 |
| C72  | -2.2816670000 | -32.5253600000 | 20.9131260000 |
| C73  | -3.5178430000 | -30.8997860000 | 17.7877220000 |
| C74  | -7.9224060000 | -32.3176350000 | 27.5945190000 |
| O75  | -8.5007710000 | -31.0426220000 | 27.4497550000 |
| C76  | -8.9618490000 | -33.3891830000 | 27.1929050000 |
| H77  | 0.2228810000  | -34.8779720000 | 23.3933890000 |
| H78  | -1.2047050000 | -32.3738100000 | 18.9509450000 |
| H79  | -1.2246670000 | -26.6106660000 | 23.6570030000 |
| H80  | -0.0678770000 | -27.7476750000 | 25.5555440000 |
| H81  | -0.4001080000 | -26.3607500000 | 26.6024400000 |
| H82  | -8.5398850000 | -24.7322080000 | 23.8783930000 |
| H83  | -6.6068190000 | -23.4104500000 | 25.8492280000 |

|      |               |                |               |
|------|---------------|----------------|---------------|
| H84  | -8.3356640000 | -23.6068610000 | 26.0942800000 |
| H85  | 3.6498930000  | -34.0689470000 | 28.5647720000 |
| H86  | 1.3103580000  | -34.7256850000 | 28.1598210000 |
| H87  | 1.4160690000  | -33.6032330000 | 29.5117110000 |
| H88  | 3.7139740000  | -33.5038260000 | 24.0758650000 |
| H89  | 4.5785150000  | -30.5566060000 | 24.2699640000 |
| H90  | 4.5208180000  | -31.4500960000 | 22.7672600000 |
| H91  | -7.8797440000 | -37.4719390000 | 20.7865920000 |
| H92  | -5.6331920000 | -38.0710600000 | 21.7437500000 |
| H93  | -4.8256820000 | -37.3009000000 | 20.3860230000 |
| H94  | -6.1316860000 | -33.8886830000 | 29.1401350000 |
| H95  | -4.4318870000 | -34.1578940000 | 28.7258590000 |
| H96  | -5.6684320000 | -35.2649230000 | 28.1317370000 |
| H97  | -9.7763130000 | -29.0312730000 | 22.5100690000 |
| H98  | -8.6659890000 | -28.0255170000 | 23.4375360000 |
| H99  | -9.3378960000 | -29.4807720000 | 24.1798590000 |
| H100 | -2.7014550000 | -31.0857450000 | 17.0827880000 |
| H101 | -3.6505530000 | -29.8135490000 | 17.8719860000 |
| H102 | -4.4394270000 | -31.3051380000 | 17.3508090000 |
| H103 | -7.6595140000 | -32.4960400000 | 28.6532400000 |
| H104 | -8.4907200000 | -34.3782080000 | 27.1478040000 |
| H105 | -9.3518040000 | -33.1419140000 | 26.1987290000 |
| H106 | -9.8097280000 | -33.4560780000 | 27.8942220000 |
| H107 | -0.4526970000 | -33.5546460000 | 21.2096540000 |
| H108 | -5.6956830000 | -30.4349330000 | 19.3492390000 |
| H109 | -7.9581920000 | -30.0958690000 | 19.3053700000 |
| H110 | -8.7216770000 | -27.5211010000 | 20.8137400000 |
| H111 | -9.1454010000 | -28.0123960000 | 19.0775090000 |
| H112 | -7.9457090000 | -30.6278230000 | 25.3114970000 |
| H113 | -3.2545200000 | -34.6684340000 | 26.8252980000 |
| H114 | 0.2860670000  | -35.8873710000 | 25.7626630000 |
| H115 | -7.1143480000 | -33.7349780000 | 23.6783850000 |
| H116 | -7.6470170000 | -36.0244450000 | 22.6912560000 |
| H117 | -3.8281130000 | -34.8468250000 | 21.3266720000 |
| H118 | -0.1234570000 | -30.6305410000 | 21.8008230000 |
| H119 | 2.3340730000  | -31.3545740000 | 21.4951860000 |
| H120 | 1.7446950000  | -30.3769070000 | 25.5349120000 |
| H121 | 4.2850230000  | -31.8652130000 | 26.4722920000 |
| H122 | 0.7418550000  | -32.8342900000 | 25.5562780000 |
| H123 | -0.5801690000 | -32.1608620000 | 29.4666400000 |
| H124 | -2.1178870000 | -30.8476220000 | 27.8800200000 |
| H125 | -4.4569020000 | -29.7012580000 | 25.6283680000 |
| H126 | -3.3225560000 | -25.8730580000 | 26.9689640000 |
| H127 | -5.1204460000 | -25.3623680000 | 25.7472230000 |
| H128 | -8.8134510000 | -28.2726350000 | 27.2541350000 |
| H129 | -9.2796280000 | -25.9498370000 | 26.5706180000 |
| H130 | -7.7470320000 | -30.3696940000 | 27.4802360000 |
| H131 | 3.2712170000  | -32.3595430000 | 28.3144230000 |
| H132 | -1.4218180000 | -25.2221450000 | 24.5787980000 |
| H133 | 0.0891160000  | -25.7121320000 | 24.1996780000 |

|      |                |                |               |
|------|----------------|----------------|---------------|
| H134 | -8.0232390000  | -23.1344070000 | 23.7901130000 |
| N135 | -6.6160520000  | -24.4850440000 | 23.2750890000 |
| H136 | 5.2636700000   | -32.9382900000 | 24.4987530000 |
| H137 | -7.0865440000  | -36.6946370000 | 19.4022920000 |
| H138 | -6.9350420000  | -38.4485890000 | 19.6469080000 |
| H139 | -4.7166250000  | -25.0513520000 | 21.7234670000 |
| C140 | -5.5860240000  | -25.6409760000 | 21.3980870000 |
| C141 | -6.8148060000  | -25.3137530000 | 22.2158050000 |
| O142 | -7.9212720000  | -25.7837540000 | 21.9416600000 |
| C143 | -5.2475400000  | -27.1439970000 | 21.4732590000 |
| C144 | -4.0438480000  | -27.4381080000 | 20.5726240000 |
| C145 | -5.0299400000  | -27.6096320000 | 22.9231590000 |
| H146 | -5.6885090000  | -24.1308710000 | 23.4553890000 |
| H147 | -5.7995930000  | -25.3665050000 | 20.3579920000 |
| H148 | -6.1131960000  | -27.6803910000 | 21.0749650000 |
| H149 | -3.1555270000  | -26.8854220000 | 20.9095480000 |
| H150 | -4.2484170000  | -27.1352290000 | 19.5366060000 |
| H151 | -3.7809420000  | -28.4973030000 | 20.5839270000 |
| H152 | -5.9290590000  | -27.4872250000 | 23.5340000000 |
| H153 | -4.2256260000  | -27.0353300000 | 23.4061340000 |
| H154 | -4.7393300000  | -28.6636890000 | 22.9552190000 |
| H155 | -2.5629100000  | -30.0513650000 | 22.3183840000 |
| C156 | -11.0219960000 | -37.0395390000 | 21.4210610000 |
| C157 | -10.4148000000 | -36.6713180000 | 22.7550390000 |
| O158 | -9.2112190000  | -36.7987210000 | 23.0028110000 |
| N159 | -11.2756090000 | -36.1747470000 | 23.6699500000 |
| C160 | -10.8109890000 | -35.7070310000 | 24.9628940000 |
| H161 | -10.3523690000 | -37.7209510000 | 20.8942660000 |
| H162 | -11.1602380000 | -36.1417080000 | 20.8074700000 |
| H163 | -12.2535080000 | -36.0902860000 | 23.4350870000 |
| H164 | -10.0045320000 | -34.9787670000 | 24.8398380000 |
| H165 | -11.6390530000 | -35.2292940000 | 25.4899290000 |
| H166 | -11.9911410000 | -37.5204050000 | 21.5567610000 |
| H167 | -10.4290940000 | -36.5298690000 | 25.5672470000 |
| O168 | -1.9501190000  | -29.4613650000 | 21.8274800000 |
| O169 | -3.3523290000  | -30.8896940000 | 23.7215820000 |
| H170 | -1.8893540000  | -28.6960330000 | 22.4202840000 |

**O<sub>H</sub>** (septet, +1)

|    |               |                |               |
|----|---------------|----------------|---------------|
| C1 | -0.8189090000 | -26.0151940000 | 24.4889320000 |
| C2 | -0.7441340000 | -26.8945710000 | 25.7557320000 |
| C3 | -2.0966170000 | -27.4388290000 | 26.0877400000 |
| N4 | -2.4822790000 | -28.7472060000 | 25.8067250000 |
| C5 | -3.1842180000 | -26.7437320000 | 26.5280480000 |
| C6 | -3.7710020000 | -28.8359870000 | 26.0791550000 |
| N7 | -4.2623970000 | -27.6232240000 | 26.5128480000 |
| C8 | -7.7228630000 | -24.0381220000 | 24.0959470000 |
| C9 | -7.4885750000 | -24.0501230000 | 25.6212370000 |

|      |               |                |               |
|------|---------------|----------------|---------------|
| C10  | -7.2250640000 | -25.4396610000 | 26.1287230000 |
| C11  | -8.2791660000 | -26.3279530000 | 26.4716800000 |
| C12  | -5.9088740000 | -25.9080030000 | 26.1560990000 |
| C13  | -8.0159200000 | -27.6225570000 | 26.8469600000 |
| C14  | -5.6043810000 | -27.2053450000 | 26.5351260000 |
| C15  | -6.6614820000 | -28.1291010000 | 26.9261300000 |
| O16  | -6.3966160000 | -29.3000490000 | 27.3152160000 |
| C17  | 2.9851550000  | -33.3739620000 | 28.0369420000 |
| C18  | 3.1588160000  | -33.5734750000 | 26.5325830000 |
| O19  | 2.6418050000  | -34.5108380000 | 25.9306740000 |
| C20  | 1.5185120000  | -33.6702460000 | 28.4207150000 |
| C21  | 0.5210520000  | -32.7629320000 | 27.7544690000 |
| N22  | -0.4534960000 | -32.0929530000 | 28.4728870000 |
| C23  | 0.2771680000  | -32.4120900000 | 26.4466320000 |
| C24  | -1.2292200000 | -31.3843360000 | 27.6140060000 |
| N25  | -0.8018800000 | -31.5513730000 | 26.3763410000 |
| N26  | 3.8858070000  | -32.6010090000 | 25.9108920000 |
| C27  | 4.2946800000  | -32.6899640000 | 24.5164050000 |
| C28  | 4.0595250000  | -31.3600500000 | 23.7646370000 |
| C29  | 2.6172390000  | -30.9997690000 | 23.5817300000 |
| N30  | 1.9153300000  | -31.2838750000 | 22.4173300000 |
| C31  | 1.6845270000  | -30.4244590000 | 24.4081730000 |
| C32  | 0.6279820000  | -30.8797780000 | 22.5699540000 |
| N33  | 0.4529650000  | -30.3576640000 | 23.7763330000 |
| C34  | -7.0255540000 | -37.7492450000 | 20.3606400000 |
| C35  | -5.7512280000 | -37.4662780000 | 21.1753250000 |
| C36  | -5.7657320000 | -36.1318820000 | 21.8533780000 |
| N37  | -6.7978640000 | -35.7217520000 | 22.6807040000 |
| C38  | -4.8749720000 | -35.0872340000 | 21.8515420000 |
| C39  | -6.5093850000 | -34.4834210000 | 23.1372390000 |
| N40  | -5.3483950000 | -34.0694470000 | 22.6550390000 |
| Cu41 | -1.4009530000 | -30.3369220000 | 24.7775590000 |
| Fe42 | -4.2693510000 | -32.1557120000 | 23.1656130000 |
| C43  | -1.5111420000 | -33.4893650000 | 21.5459230000 |
| C44  | -3.4606840000 | -33.8805960000 | 26.0054510000 |
| C45  | -7.1890090000 | -31.0484790000 | 24.7025410000 |
| C46  | -5.3730460000 | -30.8829210000 | 20.1893440000 |
| N47  | -5.9423480000 | -31.0906640000 | 22.5773370000 |
| C48  | -1.6685910000 | -33.8152500000 | 22.9039250000 |
| C49  | -0.8053270000 | -34.6615640000 | 23.6696070000 |
| C50  | -1.3690170000 | -34.7890590000 | 24.9250090000 |
| C51  | -2.5769610000 | -33.9978450000 | 24.9245430000 |
| C52  | -0.7264850000 | -35.4915350000 | 26.0360640000 |
| O53  | -1.1517720000 | -35.5601040000 | 27.1825790000 |
| N54  | -5.1469420000 | -32.3497090000 | 25.0639130000 |
| C55  | -4.6512090000 | -33.1637380000 | 26.0550770000 |
| C56  | -5.5948370000 | -33.2131200000 | 27.1563010000 |
| C57  | -6.6740980000 | -32.4437940000 | 26.7928960000 |
| C58  | -6.3710480000 | -31.8941400000 | 25.4726070000 |
| C59  | -5.4028040000 | -34.0222850000 | 28.4041190000 |



|      |               |                |               |
|------|---------------|----------------|---------------|
| N60  | -2.7169880000 | -33.4202270000 | 23.6986940000 |
| C61  | -6.9883930000 | -30.6710890000 | 23.3716340000 |
| C62  | -7.9112210000 | -29.8782350000 | 22.5746170000 |
| C63  | -7.4407330000 | -29.9108070000 | 21.2752270000 |
| C64  | -6.1961090000 | -30.6683330000 | 21.2986870000 |
| C65  | -9.1241200000 | -29.1664120000 | 23.0829430000 |
| C66  | -8.0448790000 | -29.3738380000 | 20.0565530000 |
| C67  | -8.7135100000 | -28.2160910000 | 19.9461310000 |
| N68  | -3.5715420000 | -32.2060200000 | 21.2003480000 |
| C69  | -4.1589510000 | -31.5756780000 | 20.1427610000 |
| C70  | -3.3213890000 | -31.7241610000 | 18.9577270000 |
| C71  | -2.2369320000 | -32.4549750000 | 19.3516640000 |
| C72  | -2.3925890000 | -32.7517700000 | 20.7582610000 |
| C73  | -3.6164390000 | -31.1451700000 | 17.6097050000 |
| C74  | -7.9569160000 | -32.3121640000 | 27.5851940000 |
| O75  | -8.5807100000 | -31.0422040000 | 27.4312650000 |
| C76  | -8.9714820000 | -33.3956070000 | 27.1861270000 |
| H77  | 0.1191930000  | -35.1084750000 | 23.3240990000 |
| H78  | -1.3962810000 | -32.7607960000 | 18.7404370000 |
| H79  | -1.2249990000 | -26.6271690000 | 23.6702670000 |
| H80  | -0.0637380000 | -27.7352620000 | 25.5783500000 |
| H81  | -0.3445320000 | -26.3160970000 | 26.5981040000 |
| H82  | -8.5292090000 | -24.7377890000 | 23.8595180000 |
| H83  | -6.6528470000 | -23.3871940000 | 25.8791770000 |
| H84  | -8.3856960000 | -23.6324060000 | 26.0939640000 |
| H85  | 3.6478520000  | -34.0746690000 | 28.5583460000 |
| H86  | 1.2905480000  | -34.7064630000 | 28.1489620000 |
| H87  | 1.4100450000  | -33.5951880000 | 29.5092050000 |
| H88  | 3.7109530000  | -33.4997140000 | 24.0727560000 |
| H89  | 4.5702050000  | -30.5511630000 | 24.3027760000 |
| H90  | 4.5546740000  | -31.4255430000 | 22.7868330000 |
| H91  | -7.9052180000 | -37.7552410000 | 21.0128690000 |
| H92  | -5.6185350000 | -38.2612950000 | 21.9229770000 |
| H93  | -4.8699190000 | -37.5046420000 | 20.5251200000 |
| H94  | -6.0601430000 | -33.6838300000 | 29.2102970000 |
| H95  | -4.3700210000 | -33.9607730000 | 28.7646270000 |
| H96  | -5.6172610000 | -35.0848620000 | 28.2307090000 |
| H97  | -9.9019130000 | -29.1363030000 | 22.3121450000 |
| H98  | -8.8819460000 | -28.1239200000 | 23.3280280000 |
| H99  | -9.5370850000 | -29.6404320000 | 23.9789730000 |
| H100 | -2.8424400000 | -31.4187850000 | 16.8867260000 |
| H101 | -3.6636860000 | -30.0496100000 | 17.6544250000 |
| H102 | -4.5804780000 | -31.4958500000 | 17.2202590000 |
| H103 | -7.7044730000 | -32.4665340000 | 28.6470090000 |
| H104 | -8.4849950000 | -34.3763850000 | 27.1558740000 |
| H105 | -9.3647680000 | -33.1682210000 | 26.1896040000 |
| H106 | -9.8097910000 | -33.4561000000 | 27.8942470000 |
| H107 | -0.6261680000 | -33.8837010000 | 21.0543990000 |
| H108 | -5.7034770000 | -30.4408130000 | 19.2558310000 |
| H109 | -7.9255120000 | -29.9927100000 | 19.1668150000 |

|      |                |                |               |
|------|----------------|----------------|---------------|
| H110 | -8.8012030000  | -27.5172560000 | 20.7701340000 |
| H111 | -9.1433560000  | -27.9200020000 | 18.9928280000 |
| H112 | -8.0905080000  | -30.7038480000 | 25.1921710000 |
| H113 | -3.1791750000  | -34.4486620000 | 26.8837430000 |
| H114 | 0.2468120000   | -35.9532280000 | 25.7743090000 |
| H115 | -7.1426760000  | -33.9189870000 | 23.8045020000 |
| H116 | -7.6596010000  | -36.2376630000 | 22.8744540000 |
| H117 | -3.9310610000  | -34.9984050000 | 21.3367900000 |
| H118 | -0.1384250000  | -30.9275470000 | 21.8074340000 |
| H119 | 2.3057440000   | -31.6857470000 | 21.5767690000 |
| H120 | 1.8061110000   | -30.0899540000 | 25.4271130000 |
| H121 | 4.3548290000   | -31.9163490000 | 26.4886150000 |
| H122 | 0.7827190000   | -32.7389410000 | 25.5549390000 |
| H123 | -0.5801570000  | -32.1608660000 | 29.4666730000 |
| H124 | -2.0621890000  | -30.7658580000 | 27.9124740000 |
| H125 | -4.3884630000  | -29.7148230000 | 25.9691120000 |
| H126 | -3.2856090000  | -25.7250770000 | 26.8646390000 |
| H127 | -5.1192740000  | -25.2480280000 | 25.8181780000 |
| H128 | -8.8124410000  | -28.3136330000 | 27.1049390000 |
| H129 | -9.3055490000  | -25.9731960000 | 26.4261300000 |
| H130 | -7.8661800000  | -30.3795390000 | 27.5408650000 |
| H131 | 3.2712140000   | -32.3595430000 | 28.3144150000 |
| H132 | -1.4218280000  | -25.2221490000 | 24.5787910000 |
| H133 | 0.0891170000   | -25.7121240000 | 24.1996730000 |
| H134 | -8.0232220000  | -23.1343920000 | 23.7901120000 |
| N135 | -6.5946560000  | -24.4740410000 | 23.2968160000 |
| H136 | 5.2636750000   | -32.9382860000 | 24.4987600000 |
| H137 | -7.1741600000  | -36.9836730000 | 19.5907420000 |
| H138 | -6.9598550000  | -38.7252540000 | 19.8679940000 |
| H139 | -4.7320190000  | -25.0109920000 | 21.6830250000 |
| C140 | -5.5860060000  | -25.6409930000 | 21.3980540000 |
| C141 | -6.7819880000  | -25.3876510000 | 22.2905140000 |
| O142 | -7.8335330000  | -26.0119610000 | 22.1683180000 |
| C143 | -5.1926340000  | -27.1313550000 | 21.4704130000 |
| C144 | -3.9335230000  | -27.3865320000 | 20.6388720000 |
| C145 | -5.0299250000  | -27.6096290000 | 22.9231680000 |
| H146 | -5.7795160000  | -23.8781890000 | 23.2486530000 |
| H147 | -5.8613020000  | -25.3830380000 | 20.3688960000 |
| H148 | -6.0230150000  | -27.6937500000 | 21.0340520000 |
| H149 | -3.0802690000  | -26.8201410000 | 21.0406650000 |
| H150 | -4.0778470000  | -27.0679490000 | 19.5990090000 |
| H151 | -3.6541320000  | -28.4433520000 | 20.6393170000 |
| H152 | -5.9485460000  | -27.4828780000 | 23.5022620000 |
| H153 | -4.2166140000  | -27.0765650000 | 23.4358960000 |
| H154 | -4.7940370000  | -28.6761250000 | 22.9144570000 |
| H155 | -2.3575930000  | -30.1269280000 | 22.1032300000 |
| C156 | -11.0220230000 | -37.0394780000 | 21.4210240000 |
| C157 | -10.4273530000 | -36.7206420000 | 22.7747690000 |
| O158 | -9.2482770000  | -36.9454730000 | 23.0686230000 |
| N159 | -11.2753310000 | -36.1601180000 | 23.6655330000 |

|      |                |                |               |
|------|----------------|----------------|---------------|
| C160 | -10.8110120000 | -35.7070310000 | 24.9628930000 |
| H161 | -10.3565140000 | -37.7087440000 | 20.8751850000 |
| H162 | -11.1645610000 | -36.1228520000 | 20.8375640000 |
| H163 | -12.2361200000 | -35.9988140000 | 23.4008390000 |
| H164 | -10.0040580000 | -34.9762610000 | 24.8479900000 |
| H165 | -11.6402470000 | -35.2333980000 | 25.4921700000 |
| H166 | -11.9911060000 | -37.5204580000 | 21.5567840000 |
| H167 | -10.4290510000 | -36.5298500000 | 25.5672420000 |
| O168 | -1.8280200000  | -29.7679000000 | 21.3470590000 |
| O169 | -3.1377760000  | -30.5917890000 | 23.5961930000 |
| H170 | -1.4757030000  | -28.9350200000 | 21.6961750000 |
| H171 | -3.6978910000  | -29.8156740000 | 23.7495310000 |

**O<sub>HR</sub>** (sextet, 0)

|     |               |                |               |
|-----|---------------|----------------|---------------|
| C1  | -0.8189510000 | -26.0152230000 | 24.4889490000 |
| C2  | -0.7602850000 | -26.9044510000 | 25.7515770000 |
| C3  | -2.1093600000 | -27.4696450000 | 26.0768470000 |
| N4  | -2.4808530000 | -28.7706530000 | 25.7820110000 |
| C5  | -3.2107200000 | -26.7938020000 | 26.5297430000 |
| C6  | -3.7876160000 | -28.8625930000 | 26.0494370000 |
| N7  | -4.2805520000 | -27.6721730000 | 26.4840770000 |
| C8  | -7.7227830000 | -24.0381830000 | 24.0958330000 |
| C9  | -7.4549000000 | -24.0543420000 | 25.6116560000 |
| C10 | -7.2164240000 | -25.4399110000 | 26.1521530000 |
| C11 | -8.2535050000 | -26.3024200000 | 26.5493890000 |
| C12 | -5.9282230000 | -25.9563310000 | 26.1564370000 |
| C13 | -7.9985190000 | -27.6109730000 | 26.9289380000 |
| C14 | -5.6485910000 | -27.2605780000 | 26.5532700000 |
| C15 | -6.6807830000 | -28.1763110000 | 26.9465890000 |
| O16 | -6.4369880000 | -29.3981930000 | 27.2692640000 |
| C17 | 2.9851820000  | -33.3739430000 | 28.0369260000 |
| C18 | 3.1797600000  | -33.5900540000 | 26.5381450000 |
| O19 | 2.7217020000  | -34.5656470000 | 25.9505060000 |
| C20 | 1.5197650000  | -33.6747440000 | 28.4186340000 |
| C21 | 0.5221380000  | -32.7687070000 | 27.7549990000 |
| N22 | -0.4562180000 | -32.0986980000 | 28.4704320000 |
| C23 | 0.2793990000  | -32.4273190000 | 26.4446960000 |
| C24 | -1.2356340000 | -31.4008980000 | 27.6003970000 |
| N25 | -0.8034570000 | -31.5737190000 | 26.3657970000 |
| N26 | 3.8791520000  | -32.6018560000 | 25.9080310000 |
| C27 | 4.2946250000  | -32.6899800000 | 24.5163880000 |
| C28 | 4.0444520000  | -31.3657650000 | 23.7592350000 |
| C29 | 2.5983010000  | -31.0198020000 | 23.5746650000 |
| N30 | 1.8881770000  | -31.3415450000 | 22.4240070000 |
| C31 | 1.6690610000  | -30.4225850000 | 24.3904400000 |
| C32 | 0.6002610000  | -30.9325160000 | 22.5749420000 |
| N33 | 0.4338070000  | -30.3779560000 | 23.7661020000 |
| C34 | -7.0659390000 | -37.8080220000 | 20.4091380000 |

|      |               |                |               |
|------|---------------|----------------|---------------|
| C35  | -5.7926500000 | -37.5205690000 | 21.2250330000 |
| C36  | -5.8062230000 | -36.1832850000 | 21.8976290000 |
| N37  | -6.8115130000 | -35.7853550000 | 22.7651230000 |
| C38  | -4.9358580000 | -35.1224330000 | 21.8550210000 |
| C39  | -6.5205340000 | -34.5370180000 | 23.2020650000 |
| N40  | -5.3904810000 | -34.1077960000 | 22.6696830000 |
| Cu41 | -1.4148390000 | -30.2803330000 | 24.7763810000 |
| Fe42 | -4.2783120000 | -32.1674650000 | 23.1634900000 |
| C43  | -1.5333980000 | -33.5293770000 | 21.5281090000 |
| C44  | -3.4727640000 | -33.9004970000 | 25.9972920000 |
| C45  | -7.1725250000 | -31.0316940000 | 24.7029550000 |
| C46  | -5.4094010000 | -30.9394800000 | 20.1723820000 |
| N47  | -5.9605530000 | -31.1257340000 | 22.5621300000 |
| C48  | -1.6829950000 | -33.8449520000 | 22.8922790000 |
| C49  | -0.8076790000 | -34.6677210000 | 23.6637040000 |
| C50  | -1.3690680000 | -34.7890700000 | 24.9250130000 |
| C51  | -2.5880230000 | -34.0179330000 | 24.9153750000 |
| C52  | -0.7175270000 | -35.4817920000 | 26.0318130000 |
| O53  | -1.1372420000 | -35.5788230000 | 27.1800630000 |
| N54  | -5.1555410000 | -32.3750800000 | 25.0491050000 |
| C55  | -4.6627510000 | -33.1846730000 | 26.0451160000 |
| C56  | -5.6052550000 | -33.2202800000 | 27.1490710000 |
| C57  | -6.6746440000 | -32.4377440000 | 26.7882820000 |
| C58  | -6.3665580000 | -31.8945430000 | 25.4651740000 |
| C59  | -5.4139050000 | -34.0185510000 | 28.4042840000 |
| N60  | -2.7372920000 | -33.4582790000 | 23.6830960000 |
| C61  | -6.9780460000 | -30.6665400000 | 23.3699650000 |
| C62  | -7.8836970000 | -29.8429530000 | 22.5831740000 |
| C63  | -7.4440430000 | -29.9145450000 | 21.2758580000 |
| C64  | -6.2191830000 | -30.7054710000 | 21.2869640000 |
| C65  | -9.0465330000 | -29.0656410000 | 23.1101300000 |
| C66  | -8.0535890000 | -29.3774600000 | 20.0604710000 |
| C67  | -8.6921260000 | -28.2042600000 | 19.9392620000 |
| N68  | -3.6029730000 | -32.2608030000 | 21.1815070000 |
| C69  | -4.1959890000 | -31.6355500000 | 20.1251830000 |
| C70  | -3.3592050000 | -31.7818620000 | 18.9383260000 |
| C71  | -2.2712390000 | -32.5102840000 | 19.3292640000 |
| C72  | -2.4216210000 | -32.8041270000 | 20.7385370000 |
| C73  | -3.6534400000 | -31.1953140000 | 17.5927720000 |
| C74  | -7.9546420000 | -32.2682300000 | 27.5822010000 |
| O75  | -8.5462160000 | -30.9998990000 | 27.4188750000 |
| C76  | -8.9701800000 | -33.3647120000 | 27.1861100000 |
| H77  | 0.1235280000  | -35.1050910000 | 23.3223840000 |
| H78  | -1.4278190000 | -32.8092580000 | 18.7168690000 |
| H79  | -1.2269720000 | -26.6230550000 | 23.6679990000 |
| H80  | -0.0698020000 | -27.7387890000 | 25.5736410000 |
| H81  | -0.3671950000 | -26.3278830000 | 26.5998420000 |
| H82  | -8.5383420000 | -24.7343500000 | 23.8843880000 |
| H83  | -6.5988250000 | -23.4011990000 | 25.8390200000 |
| H84  | -8.3272120000 | -23.5922430000 | 26.0945010000 |

|      |               |                |               |
|------|---------------|----------------|---------------|
| H85  | 3.6487410000  | -34.0696640000 | 28.5658130000 |
| H86  | 1.2966070000  | -34.7121660000 | 28.1456470000 |
| H87  | 1.4132910000  | -33.6025730000 | 29.5079060000 |
| H88  | 3.7138000000  | -33.5037000000 | 24.0754260000 |
| H89  | 4.5468320000  | -30.5485250000 | 24.2939340000 |
| H90  | 4.5415340000  | -31.4301590000 | 22.7818780000 |
| H91  | -7.9454530000 | -37.8167270000 | 21.0621590000 |
| H92  | -5.6593480000 | -38.3152730000 | 21.9738290000 |
| H93  | -4.9112940000 | -37.5588680000 | 20.5747280000 |
| H94  | -6.0728270000 | -33.6684300000 | 29.2045540000 |
| H95  | -4.3808810000 | -33.9517670000 | 28.7652890000 |
| H96  | -5.6275730000 | -35.0838660000 | 28.2429920000 |
| H97  | -9.8502410000 | -29.0267090000 | 22.3660140000 |
| H98  | -8.7506160000 | -28.0286290000 | 23.3154680000 |
| H99  | -9.4403380000 | -29.4870320000 | 24.0391450000 |
| H100 | -2.8789260000 | -31.4657630000 | 16.8679470000 |
| H101 | -3.6992560000 | -30.0997470000 | 17.6442200000 |
| H102 | -4.6183850000 | -31.5408630000 | 17.2004620000 |
| H103 | -7.6942430000 | -32.4316670000 | 28.6443290000 |
| H104 | -8.4754860000 | -34.3421130000 | 27.1363450000 |
| H105 | -9.3740160000 | -33.1282650000 | 26.1950700000 |
| H106 | -9.8097210000 | -33.4560590000 | 27.8942300000 |
| H107 | -0.6441580000 | -33.9175990000 | 21.0379980000 |
| H108 | -5.7392030000 | -30.4956910000 | 19.2395250000 |
| H109 | -7.9647400000 | -30.0151100000 | 19.1802860000 |
| H110 | -8.7364960000 | -27.4773600000 | 20.7424700000 |
| H111 | -9.1297990000 | -27.9165800000 | 18.9866290000 |
| H112 | -8.0437810000 | -30.6465030000 | 25.2147200000 |
| H113 | -3.1873640000 | -34.4612850000 | 26.8795110000 |
| H114 | 0.2663350000  | -35.9218900000 | 25.7632750000 |
| H115 | -7.1316440000 | -33.9799390000 | 23.8956030000 |
| H116 | -7.6567460000 | -36.3109510000 | 22.9902520000 |
| H117 | -4.0142270000 | -35.0205610000 | 21.3037170000 |
| H118 | -0.1708660000 | -30.9920430000 | 21.8173540000 |
| H119 | 2.2695070000  | -31.7723830000 | 21.5943850000 |
| H120 | 1.7938830000  | -30.0555820000 | 25.3985120000 |
| H121 | 4.2727390000  | -31.8589190000 | 26.4693740000 |
| H122 | 0.7892000000  | -32.7579960000 | 25.5554290000 |
| H123 | -0.5801560000 | -32.1608770000 | 29.4666920000 |
| H124 | -2.0717570000 | -30.7793350000 | 27.8870010000 |
| H125 | -4.4067300000 | -29.7416360000 | 25.9535580000 |
| H126 | -3.3255560000 | -25.7799720000 | 26.8746660000 |
| H127 | -5.1178220000 | -25.3324410000 | 25.7904990000 |
| H128 | -8.8132480000 | -28.2631660000 | 27.2349070000 |
| H129 | -9.2813330000 | -25.9383050000 | 26.5503600000 |
| H130 | -7.7921970000 | -30.3296240000 | 27.4635980000 |
| H131 | 3.2711930000  | -32.3595280000 | 28.3144170000 |
| H132 | -1.4218410000 | -25.2221410000 | 24.5787830000 |
| H133 | 0.0891240000  | -25.7121350000 | 24.1997220000 |
| H134 | -8.0232440000 | -23.1344110000 | 23.7901020000 |

|      |                |                |               |
|------|----------------|----------------|---------------|
| N135 | -6.6171290000  | -24.4849360000 | 23.2723660000 |
| H136 | 5.2636680000   | -32.9382740000 | 24.4987390000 |
| H137 | -7.2157830000  | -37.0408060000 | 19.6408690000 |
| H138 | -6.9982930000  | -38.7835920000 | 19.9142680000 |
| H139 | -4.7210210000  | -25.0432220000 | 21.7187960000 |
| C140 | -5.5860390000  | -25.6409650000 | 21.3981650000 |
| C141 | -6.8138280000  | -25.3302190000 | 22.2245220000 |
| O142 | -7.9093540000  | -25.8329790000 | 21.9709550000 |
| C143 | -5.2404360000  | -27.1415620000 | 21.4752920000 |
| C144 | -4.0224780000  | -27.4513700000 | 20.5988460000 |
| C145 | -5.0299070000  | -27.6096310000 | 22.9231700000 |
| H146 | -5.6999970000  | -24.0898720000 | 23.4185700000 |
| H147 | -5.8066140000  | -25.3711810000 | 20.3578660000 |
| H148 | -6.1053110000  | -27.6785640000 | 21.0737880000 |
| H149 | -3.1386190000  | -26.8991850000 | 20.9507330000 |
| H150 | -4.2006080000  | -27.1559370000 | 19.5564540000 |
| H151 | -3.7683150000  | -28.5145680000 | 20.6161860000 |
| H152 | -5.8956120000  | -27.4144630000 | 23.5613160000 |
| H153 | -4.1594720000  | -27.1213630000 | 23.3826560000 |
| H154 | -4.8577800000  | -28.6882860000 | 22.9259400000 |
| H155 | -2.3780190000  | -30.1676250000 | 22.0619960000 |
| C156 | -11.0220260000 | -37.0394360000 | 21.4210240000 |
| C157 | -10.4290520000 | -36.7624700000 | 22.7868100000 |
| O158 | -9.2776140000  | -37.0770340000 | 23.1017440000 |
| N159 | -11.2649340000 | -36.1563910000 | 23.6603810000 |
| C160 | -10.8110190000 | -35.7070240000 | 24.9628930000 |
| H161 | -10.3605580000 | -37.6977040000 | 20.8568650000 |
| H162 | -11.1657200000 | -36.1078680000 | 20.8627590000 |
| H163 | -12.1820020000 | -35.8789860000 | 23.3431030000 |
| H164 | -10.0094080000 | -34.9664690000 | 24.8675100000 |
| H165 | -11.6478750000 | -35.2440220000 | 25.4894100000 |
| H166 | -11.9910830000 | -37.5204850000 | 21.5567910000 |
| H167 | -10.4290240000 | -36.5298390000 | 25.5672340000 |
| O168 | -1.8334610000  | -29.7819370000 | 21.3281120000 |
| O169 | -3.1519430000  | -30.6177250000 | 23.5525280000 |
| H170 | -1.5296650000  | -28.9434600000 | 21.7074030000 |
| H171 | -3.6986370000  | -29.8434280000 | 23.7601890000 |

**E<sub>H</sub> (sextet, +1)**

|    |               |                |               |
|----|---------------|----------------|---------------|
| C1 | -0.8189520000 | -26.0152660000 | 24.4889180000 |
| C2 | -0.7654150000 | -26.8961850000 | 25.7554660000 |
| C3 | -2.1214300000 | -27.4556310000 | 26.0519310000 |
| N4 | -2.5153660000 | -28.7402150000 | 25.6895310000 |
| C5 | -3.2095080000 | -26.7856730000 | 26.5315020000 |
| C6 | -3.8125840000 | -28.8363490000 | 25.9511600000 |
| N7 | -4.2903880000 | -27.6534630000 | 26.4516790000 |
| C8 | -7.7228940000 | -24.0381810000 | 24.0959360000 |
| C9 | -7.4894210000 | -24.0476300000 | 25.6202410000 |

|      |               |                |               |
|------|---------------|----------------|---------------|
| C10  | -7.2363130000 | -25.4358520000 | 26.1385250000 |
| C11  | -8.2847950000 | -26.3092210000 | 26.5160200000 |
| C12  | -5.9279480000 | -25.9253030000 | 26.1380940000 |
| C13  | -8.0264450000 | -27.6096060000 | 26.8906250000 |
| C14  | -5.6358080000 | -27.2259290000 | 26.5144650000 |
| C15  | -6.6828400000 | -28.1394710000 | 26.9284760000 |
| O16  | -6.4176960000 | -29.3219970000 | 27.2987770000 |
| C17  | 2.9851480000  | -33.3739430000 | 28.0369260000 |
| C18  | 3.1608790000  | -33.5724490000 | 26.5328480000 |
| O19  | 2.6499600000  | -34.5124630000 | 25.9301610000 |
| C20  | 1.5169540000  | -33.6573370000 | 28.4170490000 |
| C21  | 0.5318460000  | -32.7351880000 | 27.7536950000 |
| N22  | -0.4574070000 | -32.0899730000 | 28.4732340000 |
| C23  | 0.3004460000  | -32.3596730000 | 26.4502490000 |
| C24  | -1.2327080000 | -31.3744110000 | 27.6212980000 |
| N25  | -0.7892220000 | -31.5127390000 | 26.3858990000 |
| N26  | 3.8851130000  | -32.5976180000 | 25.9101490000 |
| C27  | 4.2945880000  | -32.6899570000 | 24.5163900000 |
| C28  | 4.0384830000  | -31.3729590000 | 23.7503850000 |
| C29  | 2.5871230000  | -31.0591110000 | 23.5702000000 |
| N30  | 1.8235430000  | -31.6151140000 | 22.5526140000 |
| C31  | 1.6940440000  | -30.3165150000 | 24.3001210000 |
| C32  | 0.5389660000  | -31.1973290000 | 22.6951350000 |
| N33  | 0.4249630000  | -30.4098870000 | 23.7518500000 |
| C34  | -7.1021600000 | -37.9929770000 | 20.5438790000 |
| C35  | -5.8307330000 | -37.6819800000 | 21.3532330000 |
| C36  | -5.8580000000 | -36.3379670000 | 22.0112460000 |
| N37  | -6.8475160000 | -35.9503360000 | 22.9010980000 |
| C38  | -5.0142040000 | -35.2596660000 | 21.9263310000 |
| C39  | -6.5832830000 | -34.6897890000 | 23.3084830000 |
| N40  | -5.4755700000 | -34.2420580000 | 22.7376940000 |
| Cu41 | -1.3311710000 | -30.2206610000 | 24.8472100000 |
| Fe42 | -4.4434080000 | -32.3868480000 | 23.1026330000 |
| C43  | -1.6466120000 | -33.6709630000 | 21.4863760000 |
| C44  | -3.4125580000 | -33.7842220000 | 26.0337520000 |
| C45  | -7.1988410000 | -31.0476890000 | 24.6956290000 |
| C46  | -5.4527420000 | -30.9435370000 | 20.1597690000 |
| N47  | -5.9952960000 | -31.1191900000 | 22.5505160000 |
| C48  | -1.7556100000 | -33.9292760000 | 22.8651580000 |
| C49  | -0.8693210000 | -34.7529750000 | 23.6381090000 |
| C50  | -1.3690200000 | -34.7890660000 | 24.9250180000 |
| C51  | -2.5624390000 | -33.9638180000 | 24.9293370000 |
| C52  | -0.7031400000 | -35.4604570000 | 26.0396370000 |
| O53  | -1.0828780000 | -35.4624860000 | 27.2045400000 |
| N54  | -5.1196580000 | -32.2857060000 | 25.0816610000 |
| C55  | -4.6102440000 | -33.0737920000 | 26.0850120000 |
| C56  | -5.5593060000 | -33.1384580000 | 27.1870440000 |
| C57  | -6.6625740000 | -32.4146920000 | 26.8061160000 |
| C58  | -6.3619750000 | -31.8684100000 | 25.4774530000 |
| C59  | -5.3444670000 | -33.9208910000 | 28.4481600000 |

|      |               |                |               |
|------|---------------|----------------|---------------|
| N60  | -2.7516750000 | -33.4563600000 | 23.6827600000 |
| C61  | -7.0191420000 | -30.6795980000 | 23.3551120000 |
| C62  | -7.9436860000 | -29.8675460000 | 22.5702720000 |
| C63  | -7.4886890000 | -29.9053000000 | 21.2664720000 |
| C64  | -6.2563640000 | -30.6927010000 | 21.2787570000 |
| C65  | -9.1371000000 | -29.1352420000 | 23.0960060000 |
| C66  | -8.0955680000 | -29.3591730000 | 20.0534290000 |
| C67  | -8.7673250000 | -28.2025570000 | 19.9467510000 |
| N68  | -3.6778430000 | -32.3337360000 | 21.1439860000 |
| C69  | -4.2606290000 | -31.6839890000 | 20.0959840000 |
| C70  | -3.4382800000 | -31.8525790000 | 18.8998780000 |
| C71  | -2.3674700000 | -32.6248020000 | 19.2839850000 |
| C72  | -2.5269150000 | -32.9251710000 | 20.6922130000 |
| C73  | -3.7451250000 | -31.3022770000 | 17.5393390000 |
| C74  | -7.9533420000 | -32.2989540000 | 27.5935270000 |
| O75  | -8.5871120000 | -31.0374280000 | 27.4306790000 |
| C76  | -8.9576820000 | -33.3958090000 | 27.1984690000 |
| H77  | 0.0215920000  | -35.2516940000 | 23.2744850000 |
| H78  | -1.5525520000 | -32.9652980000 | 18.6554470000 |
| H79  | -1.2210320000 | -26.6269230000 | 23.6678890000 |
| H80  | -0.0691960000 | -27.7278790000 | 25.5955730000 |
| H81  | -0.3954870000 | -26.3160380000 | 26.6098310000 |
| H82  | -8.5299530000 | -24.7371440000 | 23.8616580000 |
| H83  | -6.6504370000 | -23.3868050000 | 25.8760660000 |
| H84  | -8.3837290000 | -23.6180880000 | 26.0879080000 |
| H85  | 3.6436500000  | -34.0772630000 | 28.5597820000 |
| H86  | 1.2739970000  | -34.6889230000 | 28.1411210000 |
| H87  | 1.4078770000  | -33.5846980000 | 29.5057180000 |
| H88  | 3.7180580000  | -33.5107960000 | 24.0825290000 |
| H89  | 4.5198710000  | -30.5425800000 | 24.2811130000 |
| H90  | 4.5375410000  | -31.4367690000 | 22.7739680000 |
| H91  | -7.9788500000 | -38.0082320000 | 21.1989040000 |
| H92  | -5.6856970000 | -38.4636540000 | 22.1121220000 |
| H93  | -4.9501100000 | -37.7170720000 | 20.7018890000 |
| H94  | -6.0201910000 | -33.5963290000 | 29.2448670000 |
| H95  | -4.3170200000 | -33.8121570000 | 28.8135530000 |
| H96  | -5.5144230000 | -34.9940070000 | 28.2907280000 |
| H97  | -9.9299400000 | -29.0995600000 | 22.3405490000 |
| H98  | -8.8780550000 | -28.0944270000 | 23.3314900000 |
| H99  | -9.5379520000 | -29.5966590000 | 24.0039920000 |
| H100 | -2.9376300000 | -31.5194570000 | 16.8337820000 |
| H101 | -3.8901540000 | -30.2147640000 | 17.5635890000 |
| H102 | -4.6681950000 | -31.7364770000 | 17.1351320000 |
| H103 | -7.7012600000 | -32.4476010000 | 28.6567960000 |
| H104 | -8.4635920000 | -34.3736950000 | 27.1871970000 |
| H105 | -9.3398240000 | -33.1839140000 | 26.1937850000 |
| H106 | -9.8097920000 | -33.4561000000 | 27.8942510000 |
| H107 | -0.7912020000 | -34.1117440000 | 20.9800260000 |
| H108 | -5.7858960000 | -30.5041330000 | 19.2249760000 |
| H109 | -7.9786710000 | -29.9737380000 | 19.1600060000 |



|      |                |                |               |
|------|----------------|----------------|---------------|
| H110 | -8.8597350000  | -27.5062520000 | 20.7720570000 |
| H111 | -9.1994260000  | -27.9048900000 | 18.9948520000 |
| H112 | -8.0984720000  | -30.7048840000 | 25.1911510000 |
| H113 | -3.1104370000  | -34.3195460000 | 26.9261250000 |
| H114 | 0.2426040000   | -35.9682350000 | 25.7623560000 |
| H115 | -7.1891250000  | -34.1335640000 | 24.0084400000 |
| H116 | -7.6927400000  | -36.4805640000 | 23.1276320000 |
| H117 | -4.1089570000  | -35.1438450000 | 21.3510820000 |
| H118 | -0.2602040000  | -31.4721810000 | 22.0277630000 |
| H119 | 2.1673120000   | -32.2140270000 | 21.8154180000 |
| H120 | 1.8708610000   | -29.7485220000 | 25.2010820000 |
| H121 | 4.3466530000   | -31.9065490000 | 26.4859240000 |
| H122 | 0.8188000000   | -32.6611860000 | 25.5566140000 |
| H123 | -0.5801600000  | -32.1608700000 | 29.4666670000 |
| H124 | -2.0788750000  | -30.7750230000 | 27.9224150000 |
| H125 | -4.4354750000  | -29.7054960000 | 25.7948190000 |
| H126 | -3.3111780000  | -25.7893350000 | 26.9298710000 |
| H127 | -5.1320710000  | -25.2812540000 | 25.7814690000 |
| H128 | -8.8278080000  | -28.2837200000 | 27.1775150000 |
| H129 | -9.3092490000  | -25.9450150000 | 26.5006560000 |
| H130 | -7.8728710000  | -30.3670960000 | 27.5229340000 |
| H131 | 3.2712150000   | -32.3595430000 | 28.3144210000 |
| H132 | -1.4218420000  | -25.2221090000 | 24.5788000000 |
| H133 | 0.0891600000   | -25.7121050000 | 24.1996750000 |
| H134 | -8.0232120000  | -23.1343480000 | 23.7900910000 |
| N135 | -6.5961650000  | -24.4748940000 | 23.2955130000 |
| H136 | 5.2637250000   | -32.9382820000 | 24.4987580000 |
| H137 | -7.2637380000  | -37.2354090000 | 19.7684750000 |
| H138 | -7.0196500000  | -38.9710690000 | 20.0578520000 |
| H139 | -4.7131970000  | -25.0455440000 | 21.7005330000 |
| C140 | -5.5859970000  | -25.6409850000 | 21.3980940000 |
| C141 | -6.7915650000  | -25.3573150000 | 22.2694240000 |
| O142 | -7.8584280000  | -25.9436450000 | 22.1025960000 |
| C143 | -5.2655650000  | -27.1489470000 | 21.4759410000 |
| C144 | -4.0860200000  | -27.5172210000 | 20.5719180000 |
| C145 | -5.0298440000  | -27.6096210000 | 22.9231820000 |
| H146 | -5.7528940000  | -23.9179210000 | 23.2965580000 |
| H147 | -5.8359100000  | -25.3701690000 | 20.3658430000 |
| H148 | -6.1538780000  | -27.6682780000 | 21.1069220000 |
| H149 | -3.1608510000  | -27.0307240000 | 20.9174460000 |
| H150 | -4.2614320000  | -27.2038290000 | 19.5361040000 |
| H151 | -3.9409470000  | -28.6031680000 | 20.5744090000 |
| H152 | -5.8563710000  | -27.3341050000 | 23.5832270000 |
| H153 | -4.1042600000  | -27.1888200000 | 23.3410800000 |
| H154 | -4.9707890000  | -28.7022400000 | 22.9433650000 |
| H155 | -2.5947600000  | -30.3758850000 | 22.4180910000 |
| C156 | -11.0220150000 | -37.0394900000 | 21.4210340000 |
| C157 | -10.4392750000 | -36.7933120000 | 22.7979180000 |
| O158 | -9.3150910000  | -37.1737330000 | 23.1424050000 |
| N159 | -11.2583230000 | -36.1412160000 | 23.6541690000 |

|      |                |                |               |
|------|----------------|----------------|---------------|
| C160 | -10.8110020000 | -35.7070310000 | 24.9628930000 |
| H161 | -10.3640260000 | -37.6915930000 | 20.8471660000 |
| H162 | -11.1680350000 | -36.0983160000 | 20.8799130000 |
| H163 | -12.1557990000 | -35.8207890000 | 23.3197230000 |
| H164 | -10.0109530000 | -34.9625660000 | 24.8765220000 |
| H165 | -11.6511580000 | -35.2493670000 | 25.4893700000 |
| H166 | -11.9911170000 | -37.5204510000 | 21.5567780000 |
| H167 | -10.4290590000 | -36.5298540000 | 25.5672440000 |
| O168 | -1.7044390000  | -29.9136600000 | 20.9596690000 |
| O169 | -3.0069970000  | -30.5210420000 | 23.3094020000 |
| H170 | -1.8288550000  | -28.9828300000 | 20.7217270000 |
| H171 | -3.5657500000  | -29.7404730000 | 23.4573760000 |
| H172 | -2.0314610000  | -30.4287850000 | 20.1984020000 |

$E_{HR}$  (quintet, 0)

|     |               |                |               |
|-----|---------------|----------------|---------------|
| C1  | -0.8189520000 | -26.0152660000 | 24.4889180000 |
| C2  | -0.7734470000 | -26.8896060000 | 25.7620180000 |
| C3  | -2.1254480000 | -27.4589040000 | 26.0686780000 |
| N4  | -2.5071180000 | -28.7433400000 | 25.7166180000 |
| C5  | -3.2232380000 | -26.7996500000 | 26.5527110000 |
| C6  | -3.8144490000 | -28.8423160000 | 25.9797690000 |
| N7  | -4.2967180000 | -27.6691990000 | 26.4665640000 |
| C8  | -7.7228940000 | -24.0381810000 | 24.0959360000 |
| C9  | -7.4623850000 | -24.0422690000 | 25.6119140000 |
| C10 | -7.2237210000 | -25.4234180000 | 26.1613410000 |
| C11 | -8.2601710000 | -26.2864590000 | 26.5615790000 |
| C12 | -5.9357200000 | -25.9423450000 | 26.1593690000 |
| C13 | -8.0077990000 | -27.5960750000 | 26.9422930000 |
| C14 | -5.6607730000 | -27.2506140000 | 26.5512240000 |
| C15 | -6.6894180000 | -28.1662640000 | 26.9568540000 |
| O16 | -6.4424840000 | -29.3824010000 | 27.2860390000 |
| C17 | 2.9851480000  | -33.3739430000 | 28.0369260000 |
| C18 | 3.1918860000  | -33.5924190000 | 26.5408380000 |
| O19 | 2.7551600000  | -34.5792120000 | 25.9560780000 |
| C20 | 1.5172400000  | -33.6636580000 | 28.4108100000 |
| C21 | 0.5344830000  | -32.7382090000 | 27.7534160000 |
| N22 | -0.4544320000 | -32.0897980000 | 28.4722270000 |
| C23 | 0.3065040000  | -32.3663710000 | 26.4491310000 |
| C24 | -1.2275700000 | -31.3761060000 | 27.6127090000 |
| N25 | -0.7811050000 | -31.5197180000 | 26.3799500000 |
| N26 | 3.8775340000  | -32.5966300000 | 25.9069580000 |
| C27 | 4.2945880000  | -32.6899570000 | 24.5163900000 |
| C28 | 4.0211850000  | -31.3830150000 | 23.7400090000 |
| C29 | 2.5662610000  | -31.0769900000 | 23.5699020000 |
| N30 | 1.7812620000  | -31.6767750000 | 22.5932350000 |
| C31 | 1.6898020000  | -30.2942660000 | 24.2783600000 |
| C32 | 0.5005810000  | -31.2431810000 | 22.7406670000 |
| N33 | 0.4115120000  | -30.4063400000 | 23.7595460000 |

|      |               |                |               |
|------|---------------|----------------|---------------|
| C34  | -7.0755910000 | -38.1028790000 | 20.6238460000 |
| C35  | -5.8205030000 | -37.7761190000 | 21.4529880000 |
| C36  | -5.8559980000 | -36.4163250000 | 22.0768640000 |
| N37  | -6.8503280000 | -36.0138850000 | 22.9556330000 |
| C38  | -5.0203890000 | -35.3329540000 | 21.9664000000 |
| C39  | -6.5918640000 | -34.7372740000 | 23.3281730000 |
| N40  | -5.4889260000 | -34.2983970000 | 22.7482870000 |
| Cu41 | -1.3437190000 | -30.1914060000 | 24.8556920000 |
| Fe42 | -4.4417770000 | -32.3917080000 | 23.0893570000 |
| C43  | -1.6498240000 | -33.6829570000 | 21.4747100000 |
| C44  | -3.4213780000 | -33.7905040000 | 26.0268100000 |
| C45  | -7.1949400000 | -31.0448530000 | 24.6868040000 |
| C46  | -5.4783690000 | -30.9847280000 | 20.1379410000 |
| N47  | -6.0192560000 | -31.1498740000 | 22.5280000000 |
| C48  | -1.7558790000 | -33.9429440000 | 22.8584860000 |
| C49  | -0.8667090000 | -34.7569390000 | 23.6338830000 |
| C50  | -1.3690200000 | -34.7890660000 | 24.9250180000 |
| C51  | -2.5660320000 | -33.9716680000 | 24.9228000000 |
| C52  | -0.6990140000 | -35.4604070000 | 26.0301090000 |
| O53  | -1.0619030000 | -35.4794690000 | 27.2024970000 |
| N54  | -5.1300380000 | -32.3014830000 | 25.0728490000 |
| C55  | -4.6203960000 | -33.0826070000 | 26.0778160000 |
| C56  | -5.5683030000 | -33.1371500000 | 27.1848560000 |
| C57  | -6.6658670000 | -32.4091610000 | 26.8044610000 |
| C58  | -6.3630060000 | -31.8718130000 | 25.4693600000 |
| C59  | -5.3504810000 | -33.9076190000 | 28.4530910000 |
| N60  | -2.7529380000 | -33.4725760000 | 23.6753250000 |
| C61  | -7.0229120000 | -30.6874830000 | 23.3420490000 |
| C62  | -7.9410740000 | -29.8590300000 | 22.5616070000 |
| C63  | -7.5010910000 | -29.9145240000 | 21.2537020000 |
| C64  | -6.2807310000 | -30.7264390000 | 21.2590560000 |
| C65  | -9.1048740000 | -29.0898690000 | 23.1005540000 |
| C66  | -8.1068080000 | -29.3601760000 | 20.0444430000 |
| C67  | -8.7577030000 | -28.1916030000 | 19.9342540000 |
| N68  | -3.6975780000 | -32.3732990000 | 21.1174830000 |
| C69  | -4.2791240000 | -31.7196120000 | 20.0739610000 |
| C70  | -3.4417940000 | -31.8651830000 | 18.8841380000 |
| C71  | -2.3632230000 | -32.6269190000 | 19.2699510000 |
| C72  | -2.5332390000 | -32.9447100000 | 20.6752470000 |
| C73  | -3.7373070000 | -31.2966610000 | 17.5282900000 |
| C74  | -7.9535230000 | -32.2672420000 | 27.5922870000 |
| O75  | -8.5603280000 | -31.0041560000 | 27.4291900000 |
| C76  | -8.9631760000 | -33.3657490000 | 27.1921690000 |
| H77  | 0.0270000000  | -35.2554090000 | 23.2749480000 |
| H78  | -1.5359090000 | -32.9456250000 | 18.6451230000 |
| H79  | -1.2231130000 | -26.6306340000 | 23.6720470000 |
| H80  | -0.0727390000 | -27.7198140000 | 25.6075920000 |
| H81  | -0.4020670000 | -26.3009240000 | 26.6113720000 |
| H82  | -8.5386710000 | -24.7345980000 | 23.8832210000 |
| H83  | -6.6104670000 | -23.3832450000 | 25.8403630000 |

|      |               |                |               |
|------|---------------|----------------|---------------|
| H84  | -8.3404380000 | -23.5796130000 | 26.0830000000 |
| H85  | 3.6424350000  | -34.0718350000 | 28.5700230000 |
| H86  | 1.2781860000  | -34.6946450000 | 28.1278510000 |
| H87  | 1.4076790000  | -33.5992970000 | 29.5003470000 |
| H88  | 3.7239740000  | -33.5178830000 | 24.0867100000 |
| H89  | 4.5009000000  | -30.5427590000 | 24.2576900000 |
| H90  | 4.5140940000  | -31.4543880000 | 22.7604370000 |
| H91  | -7.9669130000 | -38.0948490000 | 21.2593840000 |
| H92  | -5.6948640000 | -38.5422940000 | 22.2316860000 |
| H93  | -4.9270890000 | -37.8301580000 | 20.8202340000 |
| H94  | -6.0285640000 | -33.5758060000 | 29.2451950000 |
| H95  | -4.3232330000 | -33.7892150000 | 28.8179170000 |
| H96  | -5.5141450000 | -34.9842220000 | 28.3086570000 |
| H97  | -9.9075870000 | -29.0321010000 | 22.3561590000 |
| H98  | -8.8116500000 | -28.0576800000 | 23.3338950000 |
| H99  | -9.5013280000 | -29.5327430000 | 24.0191400000 |
| H100 | -2.9266970000 | -31.5095420000 | 16.8238470000 |
| H101 | -3.8756330000 | -30.2082540000 | 17.5656070000 |
| H102 | -4.6618900000 | -31.7174530000 | 17.1124310000 |
| H103 | -7.6997600000 | -32.4302830000 | 28.6556910000 |
| H104 | -8.4634600000 | -34.3410910000 | 27.1497420000 |
| H105 | -9.3593210000 | -33.1318400000 | 26.1972750000 |
| H106 | -9.8097920000 | -33.4561000000 | 27.8942510000 |
| H107 | -0.7868410000 | -34.1139410000 | 20.9707910000 |
| H108 | -5.8073810000 | -30.5381700000 | 19.2044530000 |
| H109 | -8.0040960000 | -29.9802000000 | 19.1521190000 |
| H110 | -8.8306500000 | -27.4830950000 | 20.7516420000 |
| H111 | -9.1868910000 | -27.8911480000 | 18.9811400000 |
| H112 | -8.0750200000 | -30.6734520000 | 25.1960740000 |
| H113 | -3.1180560000 | -34.3220370000 | 26.9215470000 |
| H114 | 0.2469810000  | -35.9649390000 | 25.7391660000 |
| H115 | -7.1981910000 | -34.1660310000 | 24.0161930000 |
| H116 | -7.6887790000 | -36.5447920000 | 23.1910930000 |
| H117 | -4.1121960000 | -35.2236750000 | 21.3929020000 |
| H118 | -0.3151040000 | -31.5514740000 | 22.1074470000 |
| H119 | 2.1014630000  | -32.3246080000 | 21.8880960000 |
| H120 | 1.8849700000  | -29.6803190000 | 25.1452030000 |
| H121 | 4.2488620000  | -31.8385960000 | 26.4621110000 |
| H122 | 0.8240470000  | -32.6740490000 | 25.5561540000 |
| H123 | -0.5801600000 | -32.1608700000 | 29.4666670000 |
| H124 | -2.0741560000 | -30.7719080000 | 27.9043540000 |
| H125 | -4.4366740000 | -29.7146570000 | 25.8434260000 |
| H126 | -3.3370490000 | -25.8020670000 | 26.9444080000 |
| H127 | -5.1225940000 | -25.3192880000 | 25.7946660000 |
| H128 | -8.8226130000 | -28.2471160000 | 27.2485430000 |
| H129 | -9.2866330000 | -25.9191230000 | 26.5624430000 |
| H130 | -7.8134590000 | -30.3300270000 | 27.4678100000 |
| H131 | 3.2712150000  | -32.3595430000 | 28.3144210000 |
| H132 | -1.4218420000 | -25.2221090000 | 24.5788000000 |
| H133 | 0.0891600000  | -25.7121050000 | 24.1996750000 |

|      |                |                |               |
|------|----------------|----------------|---------------|
| H134 | -8.0232120000  | -23.1343480000 | 23.7900910000 |
| N135 | -6.6127130000  | -24.4831010000 | 23.2785890000 |
| H136 | 5.2637250000   | -32.9382820000 | 24.4987580000 |
| H137 | -7.2148290000  | -37.3638730000 | 19.8263470000 |
| H138 | -6.9903140000  | -39.0944710000 | 20.1643680000 |
| H139 | -4.7015930000  | -25.0781210000 | 21.7306900000 |
| C140 | -5.5859970000  | -25.6409850000 | 21.3980940000 |
| C141 | -6.8178830000  | -25.2897150000 | 22.2048090000 |
| O142 | -7.9253640000  | -25.7408010000 | 21.9116500000 |
| C143 | -5.3133290000  | -27.1567130000 | 21.4831850000 |
| C144 | -4.1806730000  | -27.5690610000 | 20.5371440000 |
| C145 | -5.0298440000  | -27.6096210000 | 22.9231820000 |
| H146 | -5.6832160000  | -24.1396010000 | 23.4700450000 |
| H147 | -5.7846840000  | -25.3626800000 | 20.3562700000 |
| H148 | -6.2278290000  | -27.6535890000 | 21.1489240000 |
| H149 | -3.2321770000  | -27.0950300000 | 20.8354190000 |
| H150 | -4.3915330000  | -27.2720360000 | 19.5025230000 |
| H151 | -4.0625930000  | -28.6584510000 | 20.5539130000 |
| H152 | -5.8065250000  | -27.2903440000 | 23.6238770000 |
| H153 | -4.0697640000  | -27.2199100000 | 23.2909830000 |
| H154 | -5.0076420000  | -28.7036440000 | 22.9599550000 |
| H155 | -2.6108300000  | -30.3527890000 | 22.4297900000 |
| C156 | -11.0220150000 | -37.0394900000 | 21.4210340000 |
| C157 | -10.4434740000 | -36.8211400000 | 22.8066160000 |
| O158 | -9.3475300000  | -37.2601090000 | 23.1661870000 |
| N159 | -11.2531430000 | -36.1398050000 | 23.6516360000 |
| C160 | -10.8110020000 | -35.7070310000 | 24.9628930000 |
| H161 | -10.3648300000 | -37.6849400000 | 20.8387390000 |
| H162 | -11.1665010000 | -36.0900080000 | 20.8944020000 |
| H163 | -12.1029020000 | -35.7382430000 | 23.2815320000 |
| H164 | -10.0147120000 | -34.9573140000 | 24.8879050000 |
| H165 | -11.6555690000 | -35.2556460000 | 25.4883690000 |
| H166 | -11.9911170000 | -37.5204510000 | 21.5567780000 |
| H167 | -10.4290590000 | -36.5298540000 | 25.5672440000 |
| O168 | -1.7223810000  | -29.8945600000 | 20.9517770000 |
| O169 | -3.0144710000  | -30.5224630000 | 23.3184990000 |
| H170 | -2.0305730000  | -29.0115830000 | 20.6976990000 |
| H171 | -3.5775770000  | -29.7513790000 | 23.5009730000 |
| H172 | -2.0365210000  | -30.4896790000 | 20.2450140000 |

**R (quintet, +1)**

|    |               |                |               |
|----|---------------|----------------|---------------|
| C1 | -0.8190010000 | -26.0150340000 | 24.4889950000 |
| C2 | -0.7488210000 | -26.8613130000 | 25.7789690000 |
| C3 | -2.0953730000 | -27.4280930000 | 26.0987800000 |
| N4 | -2.4856590000 | -28.7024820000 | 25.7107520000 |
| C5 | -3.1831940000 | -26.7757700000 | 26.6080590000 |
| C6 | -3.7831280000 | -28.8070950000 | 25.9752580000 |
| N7 | -4.2582190000 | -27.6465640000 | 26.5136220000 |

|      |               |                |               |
|------|---------------|----------------|---------------|
| C8   | -7.7230160000 | -24.0380170000 | 24.0959740000 |
| C9   | -7.4787380000 | -24.0523450000 | 25.6152740000 |
| C10  | -7.2168880000 | -25.4374220000 | 26.1548520000 |
| C11  | -8.2326050000 | -26.2885800000 | 26.6077460000 |
| C12  | -5.9173650000 | -25.9366530000 | 26.1383570000 |
| C13  | -7.9460480000 | -27.5790810000 | 27.0562840000 |
| C14  | -5.6147640000 | -27.2187670000 | 26.5918850000 |
| C15  | -6.6287950000 | -28.0621110000 | 27.0741790000 |
| O16  | -6.2737310000 | -29.2805790000 | 27.5373880000 |
| C17  | 2.9849940000  | -33.3740010000 | 28.0370010000 |
| C18  | 3.1665850000  | -33.5759700000 | 26.5339530000 |
| O19  | 2.6654660000  | -34.5227810000 | 25.9338760000 |
| C20  | 1.5152010000  | -33.6547660000 | 28.4124550000 |
| C21  | 0.5355410000  | -32.7248000000 | 27.7524380000 |
| N22  | -0.4546000000 | -32.0821840000 | 28.4737280000 |
| C23  | 0.3127340000  | -32.3350450000 | 26.4515710000 |
| C24  | -1.2208010000 | -31.3529010000 | 27.6234590000 |
| N25  | -0.7721240000 | -31.4819600000 | 26.3893810000 |
| N26  | 3.8839680000  | -32.5972440000 | 25.9092810000 |
| C27  | 4.2949810000  | -32.6899990000 | 24.5160050000 |
| C28  | 4.0344970000  | -31.3773230000 | 23.7449070000 |
| C29  | 2.5820500000  | -31.0661560000 | 23.5712130000 |
| N30  | 1.7960980000  | -31.6816020000 | 22.6062580000 |
| C31  | 1.7086670000  | -30.2677170000 | 24.2649990000 |
| C32  | 0.5175520000  | -31.2423920000 | 22.7429640000 |
| N33  | 0.4295260000  | -30.3850690000 | 23.7461220000 |
| C34  | -7.0756620000 | -38.0454900000 | 20.6175520000 |
| C35  | -5.8218350000 | -37.7166370000 | 21.4469320000 |
| C36  | -5.8678700000 | -36.3646930000 | 22.0879290000 |
| N37  | -6.8874650000 | -35.9627340000 | 22.9351160000 |
| C38  | -5.0179350000 | -35.2891200000 | 22.0217250000 |
| C39  | -6.6307120000 | -34.6950720000 | 23.3339840000 |
| N40  | -5.5027100000 | -34.2583500000 | 22.8013690000 |
| Cu41 | -1.3107700000 | -30.1710740000 | 24.8498990000 |
| Fe42 | -4.4802240000 | -32.3598560000 | 23.1816480000 |
| C43  | -1.7449910000 | -33.6494600000 | 21.4981860000 |
| C44  | -3.3732660000 | -33.7608720000 | 26.0949440000 |
| C45  | -7.2107690000 | -31.0395410000 | 24.8545190000 |
| C46  | -5.5750350000 | -30.9017430000 | 20.2829860000 |
| N47  | -6.0777470000 | -31.1120010000 | 22.6755770000 |
| C48  | -1.8163890000 | -33.9166760000 | 22.8805680000 |
| C49  | -0.9117940000 | -34.7536740000 | 23.6226290000 |
| C50  | -1.3690220000 | -34.7890170000 | 24.9249740000 |
| C51  | -2.5565930000 | -33.9515270000 | 24.9679740000 |
| C52  | -0.6769870000 | -35.4679150000 | 26.0170270000 |
| O53  | -1.0247630000 | -35.4703250000 | 27.1926440000 |
| N54  | -5.1120210000 | -32.2578580000 | 25.1957550000 |
| C55  | -4.5698810000 | -33.0452080000 | 26.1779020000 |
| C56  | -5.4890660000 | -33.1218190000 | 27.3049410000 |
| C57  | -6.6092910000 | -32.4103620000 | 26.9459570000 |

|      |                |                |               |
|------|----------------|----------------|---------------|
| C58  | -6.3505380000  | -31.8588750000 | 25.6115930000 |
| C59  | -5.2248450000  | -33.9034540000 | 28.5573250000 |
| N60  | -2.7805220000  | -33.4401890000 | 23.7305620000 |
| C61  | -7.0630930000  | -30.6585200000 | 23.5122130000 |
| C62  | -7.9789340000  | -29.7944470000 | 22.7756520000 |
| C63  | -7.5658460000  | -29.8185830000 | 21.4576070000 |
| C64  | -6.3498820000  | -30.6441440000 | 21.4215700000 |
| C65  | -9.0683390000  | -28.9647540000 | 23.3839130000 |
| C66  | -8.1358960000  | -29.1509150000 | 20.2945460000 |
| C67  | -9.3837620000  | -28.6753920000 | 20.1623100000 |
| N68  | -3.7873250000  | -32.3208270000 | 21.2018970000 |
| C69  | -4.3874590000  | -31.6513020000 | 20.1810050000 |
| C70  | -3.5845750000  | -31.7974190000 | 18.9661520000 |
| C71  | -2.5056250000  | -32.5733950000 | 19.3181920000 |
| C72  | -2.6414310000  | -32.8983040000 | 20.7257230000 |
| C73  | -3.9141590000  | -31.2231540000 | 17.6209200000 |
| C74  | -7.8868960000  | -32.3666500000 | 27.7386610000 |
| O75  | -8.4027770000  | -31.0080430000 | 27.7199880000 |
| C76  | -8.9464500000  | -33.3518710000 | 27.2144720000 |
| H77  | -1.7008940000  | -32.8998490000 | 18.6693820000 |
| H78  | 3.2712800000   | -32.3595120000 | 28.3144130000 |
| H79  | -1.2227900000  | -26.6448970000 | 23.6838190000 |
| H80  | -0.0434620000  | -27.6890470000 | 25.6382540000 |
| H81  | -0.3797070000  | -26.2518600000 | 26.6131100000 |
| H82  | -8.5351560000  | -24.7340850000 | 23.8669090000 |
| H83  | -6.6401080000  | -23.3880040000 | 25.8656180000 |
| H84  | -8.3668970000  | -23.6186120000 | 26.0912190000 |
| H85  | 3.6408980000   | -34.0776560000 | 28.5626510000 |
| H86  | 1.2692630000   | -34.6839490000 | 28.1304090000 |
| H87  | 1.4044500000   | -33.5871660000 | 29.5013980000 |
| H88  | 3.7206580000   | -33.5138210000 | 24.0844190000 |
| H89  | 4.5156460000   | -30.5425380000 | 24.2688290000 |
| H90  | 4.5298880000   | -31.4462470000 | 22.7667450000 |
| H91  | -7.9646260000  | -38.0623550000 | 21.2558670000 |
| H92  | -5.6858040000  | -38.4899410000 | 22.2163720000 |
| H93  | -4.9298200000  | -37.7543750000 | 20.8113690000 |
| H94  | -5.3176510000  | -34.9834480000 | 28.3854870000 |
| H95  | -5.9144050000  | -33.6375120000 | 29.3643880000 |
| H96  | -4.2058440000  | -33.7280770000 | 28.9203380000 |
| H97  | -10.0616510000 | -29.4194580000 | 23.2652590000 |
| H98  | -9.0907600000  | -27.9766960000 | 22.9088570000 |
| H99  | -8.8970980000  | -28.8124100000 | 24.4545880000 |
| H100 | -3.1254220000  | -31.4401050000 | 16.8942720000 |
| H101 | -4.0435150000  | -30.1340710000 | 17.6641200000 |
| H102 | -4.8517420000  | -31.6388450000 | 17.2307830000 |
| H103 | -7.6530230000  | -32.6264800000 | 28.7793250000 |
| H104 | -8.4977150000  | -34.3449900000 | 27.1065750000 |
| H105 | -9.2995630000  | -33.0225720000 | 26.2318570000 |
| H106 | -9.8097290000  | -33.4560170000 | 27.8941730000 |
| H107 | -0.9008540000  | -34.0862580000 | 20.9693360000 |

|      |                |                |               |
|------|----------------|----------------|---------------|
| H108 | -5.9259990000  | -30.4625990000 | 19.3549270000 |
| H109 | -7.4647420000  | -29.0308130000 | 19.4446660000 |
| H110 | -10.1327230000 | -28.7673760000 | 20.9406430000 |
| H111 | -9.6918870000  | -28.1733490000 | 19.2503240000 |
| H112 | -8.1028210000  | -30.6920810000 | 25.3618180000 |
| H113 | -3.0494140000  | -34.2956770000 | 26.9801960000 |
| H114 | 0.2551610000   | -35.9852560000 | 25.7129670000 |
| H115 | -7.2602710000  | -34.1253240000 | 24.0018920000 |
| H116 | -7.7348560000  | -36.4927370000 | 23.1451890000 |
| H117 | -4.0926050000  | -35.1862980000 | 21.4765970000 |
| H118 | -0.2968540000  | -31.5521450000 | 22.1095710000 |
| H119 | 2.1203190000   | -32.3341370000 | 21.9068030000 |
| H120 | 1.9074160000   | -29.6390530000 | 25.1201740000 |
| H121 | 4.3302250000   | -31.8935510000 | 26.4816060000 |
| H122 | 0.8352100000   | -32.6291960000 | 25.5574950000 |
| H123 | -0.5801650000  | -32.1608890000 | 29.4668010000 |
| H124 | -2.0643930000  | -30.7499050000 | 27.9247890000 |
| H125 | -4.3990610000  | -29.6781690000 | 25.8023170000 |
| H126 | -3.2940280000  | -25.7864650000 | 27.0222590000 |
| H127 | -5.1196840000  | -25.3252770000 | 25.7313800000 |
| H128 | -8.7429430000  | -28.2248950000 | 27.4135490000 |
| H129 | -9.2633880000  | -25.9428480000 | 26.6140800000 |
| H130 | -9.1613490000  | -30.9590800000 | 28.3233490000 |
| H131 | -0.0396570000  | -35.2625890000 | 23.2284810000 |
| H132 | -1.4217640000  | -25.2221200000 | 24.5787620000 |
| H133 | 0.0891110000   | -25.7122690000 | 24.1996400000 |
| H134 | -8.0231180000  | -23.1344260000 | 23.7901100000 |
| N135 | -6.6052740000  | -24.4870640000 | 23.2904150000 |
| H136 | 5.2635660000   | -32.9382630000 | 24.4989890000 |
| H137 | -7.2289950000  | -37.2964710000 | 19.8321550000 |
| H138 | -6.9770660000  | -39.0275190000 | 20.1423090000 |
| H139 | -4.7122550000  | -25.0542140000 | 21.7155360000 |
| C140 | -5.5860130000  | -25.6410260000 | 21.3980200000 |
| C141 | -6.8080550000  | -25.3415130000 | 22.2407820000 |
| O142 | -7.8841350000  | -25.8899560000 | 22.0223260000 |
| C143 | -5.2761390000  | -27.1493510000 | 21.4787060000 |
| C144 | -4.1090190000  | -27.5334240000 | 20.5648610000 |
| C145 | -5.0299920000  | -27.6096400000 | 22.9232670000 |
| H146 | -5.7399990000  | -23.9666520000 | 23.3258670000 |
| H147 | -5.8116740000  | -25.3673900000 | 20.3608460000 |
| H148 | -6.1762630000  | -27.6579340000 | 21.1254020000 |
| H149 | -3.1790930000  | -27.0444810000 | 20.8933330000 |
| H150 | -4.2938380000  | -27.2323440000 | 19.5267120000 |
| H151 | -3.9641290000  | -28.6192700000 | 20.5809230000 |
| H152 | -5.8411090000  | -27.3142320000 | 23.5943300000 |
| H153 | -4.0913420000  | -27.2028600000 | 23.3261010000 |
| H154 | -4.9901180000  | -28.7028600000 | 22.9490970000 |
| H155 | -3.5513190000  | -29.6837160000 | 23.4818550000 |
| C156 | -11.0220700000 | -37.0398980000 | 21.4210000000 |
| C157 | -10.4479920000 | -36.8087010000 | 22.8045900000 |



|      |                |                |               |
|------|----------------|----------------|---------------|
| O158 | -9.3420660000  | -37.2210920000 | 23.1666260000 |
| N159 | -11.2607260000 | -36.1353720000 | 23.6539840000 |
| C160 | -10.8109180000 | -35.7070120000 | 24.9629590000 |
| H161 | -10.3630350000 | -37.6892890000 | 20.8455200000 |
| H162 | -11.1670650000 | -36.0944600000 | 20.8876210000 |
| H163 | -12.1432300000 | -35.7858620000 | 23.3089660000 |
| H164 | -10.0103350000 | -34.9609380000 | 24.8791450000 |
| H165 | -11.6517580000 | -35.2517320000 | 25.4915520000 |
| H166 | -11.9911000000 | -37.5201190000 | 21.5567400000 |
| H167 | -10.4291310000 | -36.5298840000 | 25.5672450000 |
| O168 | -3.0193180000  | -30.4860040000 | 23.3561190000 |
| H169 | -2.6152580000  | -30.3825050000 | 22.4566940000 |
| H170 | -7.0703210000  | -29.8394360000 | 27.6916540000 |
| O171 | -1.7196530000  | -29.9426920000 | 20.9854760000 |
| H172 | -1.8388870000  | -29.0087930000 | 20.7567020000 |
| H173 | -2.0703590000  | -30.4487460000 | 20.2285690000 |

A (singlet, +1)

|     |               |                |               |
|-----|---------------|----------------|---------------|
| C1  | -0.8190210000 | -26.0150640000 | 24.4889620000 |
| C2  | -0.7295080000 | -26.8027800000 | 25.8175980000 |
| C3  | -2.0667180000 | -27.3816990000 | 26.1484640000 |
| N4  | -2.4411600000 | -28.6505450000 | 25.7295000000 |
| C5  | -3.1691740000 | -26.7450980000 | 26.6436210000 |
| C6  | -3.7426040000 | -28.7660480000 | 25.9485130000 |
| N7  | -4.2359780000 | -27.6237550000 | 26.5034660000 |
| C8  | -7.7230420000 | -24.0380500000 | 24.0959570000 |
| C9  | -7.4872170000 | -24.0596750000 | 25.6165070000 |
| C10 | -7.2168750000 | -25.4481490000 | 26.1420840000 |
| C11 | -8.2273510000 | -26.3197000000 | 26.5652100000 |
| C12 | -5.9109170000 | -25.9302390000 | 26.1335180000 |
| C13 | -7.9297180000 | -27.6166920000 | 26.9892220000 |
| C14 | -5.5973090000 | -27.2163910000 | 26.5640700000 |
| C15 | -6.6074350000 | -28.0841710000 | 27.0098230000 |
| O16 | -6.2438700000 | -29.3142110000 | 27.4418980000 |
| C17 | 2.9849930000  | -33.3739930000 | 28.0369990000 |
| C18 | 3.1637510000  | -33.5703160000 | 26.5318830000 |
| O19 | 2.6588670000  | -34.5138700000 | 25.9293160000 |
| C20 | 1.5139160000  | -33.6548420000 | 28.4105970000 |
| C21 | 0.5348530000  | -32.7227940000 | 27.7506080000 |
| N22 | -0.4543240000 | -32.0788230000 | 28.4730450000 |
| C23 | 0.3182590000  | -32.3234140000 | 26.4512290000 |
| C24 | -1.2114380000 | -31.3372190000 | 27.6246760000 |
| N25 | -0.7597510000 | -31.4608080000 | 26.3903140000 |
| N26 | 3.8799150000  | -32.5899580000 | 25.9072190000 |
| C27 | 4.2950000000  | -32.6899950000 | 24.5159970000 |
| C28 | 4.0790250000  | -31.3745190000 | 23.7357520000 |
| C29 | 2.6439780000  | -30.9969640000 | 23.5732540000 |
| N30 | 1.8345090000  | -31.4949070000 | 22.5608250000 |

|      |               |                |               |
|------|---------------|----------------|---------------|
| C31  | 1.8051910000  | -30.2300470000 | 24.3397060000 |
| C32  | 0.5733560000  | -31.0210290000 | 22.7425800000 |
| N33  | 0.5256740000  | -30.2552170000 | 23.8196390000 |
| C34  | -6.9648540000 | -37.8164020000 | 20.4087810000 |
| C35  | -5.7343220000 | -37.5154270000 | 21.2816120000 |
| C36  | -5.7722020000 | -36.1588440000 | 21.9128610000 |
| N37  | -6.8618320000 | -35.6966550000 | 22.6326450000 |
| C38  | -4.8538230000 | -35.1424180000 | 21.9620320000 |
| C39  | -6.5853960000 | -34.4571270000 | 23.0817220000 |
| N40  | -5.3713590000 | -34.0917850000 | 22.6953370000 |
| Cu41 | -1.2419620000 | -30.0568010000 | 24.8581100000 |
| Fe42 | -4.4342910000 | -32.3815420000 | 23.1902690000 |
| C43  | -1.6091520000 | -33.4843750000 | 21.5774730000 |
| C44  | -3.4515920000 | -33.9672510000 | 26.0446830000 |
| C45  | -7.2188790000 | -31.1800380000 | 24.8413850000 |
| C46  | -5.5375250000 | -30.9584010000 | 20.3188360000 |
| N47  | -6.0596130000 | -31.2867130000 | 22.6830220000 |
| C48  | -1.7596360000 | -33.8254430000 | 22.9214590000 |
| C49  | -0.8394890000 | -34.6272510000 | 23.6635000000 |
| C50  | -1.3690190000 | -34.7890470000 | 24.9250070000 |
| C51  | -2.6160330000 | -34.0558280000 | 24.9373210000 |
| C52  | -0.6721330000 | -35.4517670000 | 26.0264970000 |
| O53  | -1.0754620000 | -35.5488700000 | 27.1795520000 |
| N54  | -5.1951630000 | -32.5321270000 | 25.0753940000 |
| C55  | -4.6473260000 | -33.2750090000 | 26.0921540000 |
| C56  | -5.5191830000 | -33.2713090000 | 27.2506180000 |
| C57  | -6.6141350000 | -32.5232700000 | 26.9064600000 |
| C58  | -6.3836290000 | -32.0421870000 | 25.5489940000 |
| C59  | -5.2278470000 | -34.0084110000 | 28.5232240000 |
| N60  | -2.8303660000 | -33.4820250000 | 23.7155110000 |
| C61  | -7.0347330000 | -30.7965280000 | 23.5188920000 |
| C62  | -7.9134780000 | -29.8871940000 | 22.8066540000 |
| C63  | -7.5061760000 | -29.9062460000 | 21.4903960000 |
| C64  | -6.3202750000 | -30.7631820000 | 21.4470210000 |
| C65  | -8.9691670000 | -29.0298120000 | 23.4352840000 |
| C66  | -8.0419030000 | -29.2014580000 | 20.3336960000 |
| C67  | -9.2207190000 | -28.5669440000 | 20.2377590000 |
| N68  | -3.7165880000 | -32.2624360000 | 21.3226050000 |
| C69  | -4.3218050000 | -31.6316090000 | 20.2737050000 |
| C70  | -3.4924780000 | -31.7173650000 | 19.0774780000 |
| C71  | -2.3803190000 | -32.4131580000 | 19.4465850000 |
| C72  | -2.5243140000 | -32.7513580000 | 20.8424550000 |
| C73  | -3.8253200000 | -31.1245860000 | 17.7435760000 |
| C74  | -7.8742070000 | -32.4187280000 | 27.7166440000 |
| O75  | -8.3611710000 | -31.0524830000 | 27.6840320000 |
| C76  | -8.9531550000 | -33.3881070000 | 27.2091940000 |
| H77  | 0.1010560000  | -35.0165600000 | 23.2926620000 |
| H78  | -1.5317210000 | -32.6815640000 | 18.8286300000 |
| H79  | -1.2255660000 | -26.6723350000 | 23.7100090000 |
| H80  | -0.0015770000 | -27.6174640000 | 25.7172890000 |

|      |               |                |               |
|------|---------------|----------------|---------------|
| H81  | -0.3791050000 | -26.1459290000 | 26.6233440000 |
| H82  | -8.5353380000 | -24.7330970000 | 23.8630520000 |
| H83  | -6.6547310000 | -23.3917580000 | 25.8770750000 |
| H84  | -8.3817920000 | -23.6368430000 | 26.0907330000 |
| H85  | 3.6408640000  | -34.0790330000 | 28.5605160000 |
| H86  | 1.2701730000  | -34.6848530000 | 28.1292190000 |
| H87  | 1.4021670000  | -33.5877910000 | 29.4994240000 |
| H88  | 3.7135640000  | -33.5054050000 | 24.0795120000 |
| H89  | 4.6031690000  | -30.5588020000 | 24.2489150000 |
| H90  | 4.5641750000  | -31.4742640000 | 22.7555220000 |
| H91  | -7.8777780000 | -37.8083950000 | 21.0137830000 |
| H92  | -5.6503740000 | -38.2844090000 | 22.0626140000 |
| H93  | -4.8191140000 | -37.5829240000 | 20.6830010000 |
| H94  | -5.9181080000 | -33.7327730000 | 29.3257030000 |
| H95  | -4.2109890000 | -33.7982480000 | 28.8737700000 |
| H96  | -5.2971980000 | -35.0945930000 | 28.3838250000 |
| H97  | -9.9841690000 | -29.4058910000 | 23.2466750000 |
| H98  | -8.9051470000 | -28.0131280000 | 23.0283130000 |
| H99  | -8.8333100000 | -28.9552170000 | 24.5182110000 |
| H100 | -3.0403180000 | -31.3426700000 | 17.0134930000 |
| H101 | -3.9319210000 | -30.0341190000 | 17.8070140000 |
| H102 | -4.7700280000 | -31.5196930000 | 17.3495310000 |
| H103 | -7.6344330000 | -32.6707460000 | 28.7575230000 |
| H104 | -8.5288890000 | -34.3932690000 | 27.1166990000 |
| H105 | -9.3028240000 | -33.0656780000 | 26.2232480000 |
| H106 | -9.8097600000 | -33.4561000000 | 27.8942240000 |
| H107 | -0.7192520000 | -33.8410420000 | 21.0668070000 |
| H108 | -5.8732020000 | -30.5118940000 | 19.3914150000 |
| H109 | -7.4029500000 | -29.1877440000 | 19.4528830000 |
| H110 | -9.9386720000 | -28.5220510000 | 21.0472300000 |
| H111 | -9.4964250000 | -28.0563760000 | 19.3203200000 |
| H112 | -8.0773390000 | -30.7852040000 | 25.3673800000 |
| H113 | -3.1205820000 | -34.4976310000 | 26.9282800000 |
| H114 | 0.3235990000  | -35.8517880000 | 25.7506070000 |
| H115 | -7.2551970000 | -33.8514820000 | 23.6714990000 |
| H116 | -7.7428250000 | -36.1973690000 | 22.7820640000 |
| H117 | -3.8671970000 | -35.0917740000 | 21.5317570000 |
| H118 | -0.2726040000 | -31.2653710000 | 22.1178320000 |
| H119 | 2.1365200000  | -32.0863800000 | 21.7997820000 |
| H120 | 2.0300530000  | -29.6851690000 | 25.2444480000 |
| H121 | 4.3385120000  | -31.8958760000 | 26.4819050000 |
| H122 | 0.8448590000  | -32.6113470000 | 25.5575330000 |
| H123 | -0.5801670000 | -32.1608890000 | 29.4667910000 |
| H124 | -2.0472270000 | -30.7238160000 | 27.9278320000 |
| H125 | -4.3500370000 | -29.6178510000 | 25.6916870000 |
| H126 | -3.2987770000 | -25.7632030000 | 27.0693280000 |
| H127 | -5.1157680000 | -25.3015920000 | 25.7491650000 |
| H128 | -8.7236250000 | -28.2792840000 | 27.3228660000 |
| H129 | -9.2625400000 | -25.9871480000 | 26.5651450000 |
| H130 | -9.1136430000 | -30.9794330000 | 28.2924800000 |

|      |                |                |               |
|------|----------------|----------------|---------------|
| H131 | 3.2712790000   | -32.3595120000 | 28.3144110000 |
| H132 | -1.4217560000  | -25.2221240000 | 24.5787680000 |
| H133 | 0.0891100000   | -25.7122520000 | 24.1996770000 |
| H134 | -8.0230980000  | -23.1344300000 | 23.7901230000 |
| N135 | -6.6067460000  | -24.4877760000 | 23.2894670000 |
| H136 | 5.2635510000   | -32.9382670000 | 24.4989950000 |
| H137 | -7.0719000000  | -37.0710560000 | 19.6126350000 |
| H138 | -6.8750300000  | -38.8044050000 | 19.9451470000 |
| H139 | -4.7227760000  | -25.0351850000 | 21.7076590000 |
| C140 | -5.5860030000  | -25.6409930000 | 21.3980010000 |
| C141 | -6.8021790000  | -25.3655470000 | 22.2558120000 |
| O142 | -7.8723600000  | -25.9375100000 | 22.0622580000 |
| C143 | -5.2273040000  | -27.1448170000 | 21.4738670000 |
| C144 | -3.9973860000  | -27.4681210000 | 20.6183610000 |
| C145 | -5.0299090000  | -27.6096400000 | 22.9231950000 |
| H146 | -5.7458590000  | -23.9597360000 | 23.3117920000 |
| H147 | -5.8284500000  | -25.3705440000 | 20.3634590000 |
| H148 | -6.0897740000  | -27.6808320000 | 21.0672720000 |
| H149 | -3.1046960000  | -26.9553930000 | 21.0015810000 |
| H150 | -4.1383400000  | -27.1601700000 | 19.5742890000 |
| H151 | -3.7931090000  | -28.5451760000 | 20.6349790000 |
| H152 | -5.9388870000  | -27.4779910000 | 23.5181540000 |
| H153 | -4.2221800000  | -27.0450100000 | 23.4107230000 |
| H154 | -4.7524230000  | -28.6672310000 | 22.9590320000 |
| H155 | -7.0372010000  | -29.8709470000 | 27.6107500000 |
| C156 | -11.0219920000 | -37.0395550000 | 21.4210640000 |
| C157 | -10.4330490000 | -36.7285420000 | 22.7785090000 |
| O158 | -9.2591250000  | -36.9694520000 | 23.0845180000 |
| N159 | -11.2774800000 | -36.1567990000 | 23.6652070000 |
| C160 | -10.8110160000 | -35.7070390000 | 24.9629140000 |
| H161 | -10.3564530000 | -37.7095910000 | 20.8758260000 |
| H162 | -11.1626990000 | -36.1216050000 | 20.8401640000 |
| H163 | -12.2331260000 | -35.9750790000 | 23.3943770000 |
| H164 | -10.0026160000 | -34.9760740000 | 24.8485580000 |
| H165 | -11.6404810000 | -35.2340550000 | 25.4926220000 |
| H166 | -11.9911370000 | -37.5203900000 | 21.5567550000 |
| H167 | -10.4290790000 | -36.5298610000 | 25.5672320000 |
| O168 | -2.4012000000  | -30.5996550000 | 23.2159790000 |
| O169 | -3.6303610000  | -30.7912010000 | 23.6518460000 |

Ar (doublet, 0)

|    |               |                |               |
|----|---------------|----------------|---------------|
| C1 | -0.8190210000 | -26.0150640000 | 24.4889620000 |
| C2 | -0.7280690000 | -26.7583890000 | 25.8454110000 |
| C3 | -2.0646600000 | -27.3282810000 | 26.1915870000 |
| N4 | -2.4308110000 | -28.5930140000 | 25.7599510000 |
| C5 | -3.1693850000 | -26.7028240000 | 26.6964490000 |
| C6 | -3.7285840000 | -28.7240160000 | 25.9753250000 |
| N7 | -4.2301920000 | -27.5913600000 | 26.5515250000 |

|      |               |                |               |
|------|---------------|----------------|---------------|
| C8   | -7.7230420000 | -24.0380500000 | 24.0959570000 |
| C9   | -7.4965670000 | -24.0583920000 | 25.6177560000 |
| C10  | -7.2245320000 | -25.4434510000 | 26.1516060000 |
| C11  | -8.2330270000 | -26.3255580000 | 26.5569500000 |
| C12  | -5.9139750000 | -25.9127460000 | 26.1645640000 |
| C13  | -7.9282620000 | -27.6187400000 | 26.9883920000 |
| C14  | -5.5927970000 | -27.1948950000 | 26.5995540000 |
| C15  | -6.6012490000 | -28.0722010000 | 27.0340210000 |
| O16  | -6.2285520000 | -29.2906210000 | 27.4810580000 |
| C17  | 2.9849930000  | -33.3739930000 | 28.0369990000 |
| C18  | 3.2258950000  | -33.6080820000 | 26.5481010000 |
| O19  | 2.8499530000  | -34.6281090000 | 25.9782330000 |
| C20  | 1.5066020000  | -33.6443600000 | 28.3832070000 |
| C21  | 0.5530320000  | -32.6753730000 | 27.7454590000 |
| N22  | -0.4377250000 | -32.0424120000 | 28.4763830000 |
| C23  | 0.3656960000  | -32.2284700000 | 26.4571840000 |
| C24  | -1.1708680000 | -31.2643780000 | 27.6333010000 |
| N25  | -0.6978260000 | -31.3492950000 | 26.4055420000 |
| N26  | 3.8671170000  | -32.5910910000 | 25.9018540000 |
| C27  | 4.2950000000  | -32.6899950000 | 24.5159970000 |
| C28  | 4.0703630000  | -31.3817210000 | 23.7310500000 |
| C29  | 2.6349610000  | -31.0002190000 | 23.5900960000 |
| N30  | 1.7535030000  | -31.6456910000 | 22.7325970000 |
| C31  | 1.8616870000  | -30.0776310000 | 24.2474710000 |
| C32  | 0.5160890000  | -31.1021310000 | 22.8976060000 |
| N33  | 0.5543220000  | -30.1485120000 | 23.8141330000 |
| C34  | -6.9921720000 | -37.9247440000 | 20.5292570000 |
| C35  | -5.7653810000 | -37.5985720000 | 21.3992630000 |
| C36  | -5.8191970000 | -36.2382430000 | 22.0209120000 |
| N37  | -6.8776560000 | -35.8075870000 | 22.8036020000 |
| C38  | -4.9415100000 | -35.1830670000 | 21.9983710000 |
| C39  | -6.6111890000 | -34.5431100000 | 23.2138960000 |
| N40  | -5.4430570000 | -34.1382710000 | 22.7474500000 |
| Cu41 | -1.2631070000 | -29.9704970000 | 24.8337960000 |
| Fe42 | -4.4826920000 | -32.4040600000 | 23.2040250000 |
| C43  | -1.7028320000 | -33.5430640000 | 21.5552430000 |
| C44  | -3.4246090000 | -33.9205740000 | 26.0803760000 |
| C45  | -7.2544620000 | -31.2233910000 | 24.8650260000 |
| C46  | -5.5878060000 | -30.9403800000 | 20.3403590000 |
| N47  | -6.1050460000 | -31.2938120000 | 22.7000770000 |
| C48  | -1.8267480000 | -33.8749730000 | 22.9096700000 |
| C49  | -0.8859870000 | -34.6672290000 | 23.6373210000 |
| C50  | -1.3690190000 | -34.7890470000 | 24.9250070000 |
| C51  | -2.6159190000 | -34.0445400000 | 24.9532010000 |
| C52  | -0.6407350000 | -35.4279330000 | 26.0076620000 |
| O53  | -0.9862800000 | -35.5046350000 | 27.1853620000 |
| N54  | -5.2046750000 | -32.5355990000 | 25.1062490000 |
| C55  | -4.6295830000 | -33.2387730000 | 26.1351410000 |
| C56  | -5.4869720000 | -33.2245900000 | 27.3072240000 |
| C57  | -6.6015740000 | -32.5108150000 | 26.9559040000 |

|      |                |                |               |
|------|----------------|----------------|---------------|
| C58  | -6.3947120000  | -32.0596690000 | 25.5803620000 |
| C59  | -5.1666760000  | -33.9247440000 | 28.5942340000 |
| N60  | -2.8699020000  | -33.5046120000 | 23.7263510000 |
| C61  | -7.0897930000  | -30.8346230000 | 23.5386050000 |
| C62  | -7.9892110000  | -29.9315850000 | 22.8350790000 |
| C63  | -7.5749320000  | -29.9189320000 | 21.5223850000 |
| C64  | -6.3730780000  | -30.7588250000 | 21.4724880000 |
| C65  | -9.0653160000  | -29.1024280000 | 23.4682060000 |
| C66  | -8.1206350000  | -29.2027300000 | 20.3784070000 |
| C67  | -9.3327450000  | -28.6352830000 | 20.2642120000 |
| N68  | -3.7887940000  | -32.2847560000 | 21.3204040000 |
| C69  | -4.3784750000  | -31.6284370000 | 20.2818950000 |
| C70  | -3.5526730000  | -31.7127840000 | 19.0771180000 |
| C71  | -2.4582580000  | -32.4385910000 | 19.4310840000 |
| C72  | -2.6096040000  | -32.7899860000 | 20.8293300000 |
| C73  | -3.8766090000  | -31.0890790000 | 17.7544860000 |
| C74  | -7.8621970000  | -32.4234010000 | 27.7597270000 |
| O75  | -8.3474270000  | -31.0506970000 | 27.7652850000 |
| C76  | -8.9462350000  | -33.3699610000 | 27.2186130000 |
| H77  | 0.0366300000   | -35.0793460000 | 23.2437060000 |
| H78  | -1.6142510000  | -32.7132000000 | 18.8082240000 |
| H79  | -1.2256040000  | -26.6945530000 | 23.7310370000 |
| H80  | -0.0036920000  | -27.5787260000 | 25.7734660000 |
| H81  | -0.3795940000  | -26.0706140000 | 26.6268710000 |
| H82  | -8.5361950000  | -24.7317010000 | 23.8601340000 |
| H83  | -6.6666200000  | -23.3875220000 | 25.8817200000 |
| H84  | -8.3948830000  | -23.6347690000 | 26.0855370000 |
| H85  | 3.6228680000   | -34.0758250000 | 28.5871140000 |
| H86  | 1.2497660000   | -34.6630060000 | 28.0723380000 |
| H87  | 1.3853270000   | -33.6074370000 | 29.4731670000 |
| H88  | 3.7210170000   | -33.5106470000 | 24.0767360000 |
| H89  | 4.6002070000   | -30.5603600000 | 24.2305490000 |
| H90  | 4.5455030000   | -31.4912170000 | 22.7457640000 |
| H91  | -7.9029490000  | -37.9256100000 | 21.1372220000 |
| H92  | -5.6673260000  | -38.3664780000 | 22.1807710000 |
| H93  | -4.8516000000  | -37.6548770000 | 20.7966230000 |
| H94  | -5.8606930000  | -33.6526340000 | 29.3961890000 |
| H95  | -4.1542510000  | -33.6750530000 | 28.9334410000 |
| H96  | -5.2000360000  | -35.0163230000 | 28.4816880000 |
| H97  | -10.0713790000 | -29.5176660000 | 23.3099800000 |
| H98  | -9.0527770000  | -28.0918580000 | 23.0410840000 |
| H99  | -8.9104500000  | -29.0038600000 | 24.5471590000 |
| H100 | -3.0958440000  | -31.3051610000 | 17.0178360000 |
| H101 | -3.9670430000  | -29.9977910000 | 17.8376600000 |
| H102 | -4.8291100000  | -31.4591180000 | 17.3525430000 |
| H103 | -7.6346400000  | -32.7056270000 | 28.7962340000 |
| H104 | -8.5229450000  | -34.3727490000 | 27.0996020000 |
| H105 | -9.2844760000  | -33.0189060000 | 26.2388800000 |
| H106 | -9.8097600000  | -33.4561000000 | 27.8942240000 |
| H107 | -0.8253310000  | -33.9149670000 | 21.0311360000 |

|      |                |                |               |
|------|----------------|----------------|---------------|
| H108 | -5.9229310000  | -30.4779280000 | 19.4191570000 |
| H109 | -7.4572590000  | -29.1198580000 | 19.5185470000 |
| H110 | -10.0774660000 | -28.6689550000 | 21.0507890000 |
| H111 | -9.6092440000  | -28.1015830000 | 19.3596780000 |
| H112 | -8.1164050000  | -30.8392540000 | 25.3952350000 |
| H113 | -3.0690630000  | -34.4223250000 | 26.9718760000 |
| H114 | 0.3412890000   | -35.8442310000 | 25.6977560000 |
| H115 | -7.2622270000  | -33.9533810000 | 23.8403970000 |
| H116 | -7.7215600000  | -36.3372080000 | 23.0136390000 |
| H117 | -3.9840000000  | -35.1033290000 | 21.5090680000 |
| H118 | -0.3795390000  | -31.4327370000 | 22.3891320000 |
| H119 | 1.9793630000   | -32.4020000000 | 22.1026840000 |
| H120 | 2.1598910000   | -29.3778970000 | 25.0155260000 |
| H121 | 4.1434950000   | -31.7762990000 | 26.4305230000 |
| H122 | 0.9058110000   | -32.4918710000 | 25.5623530000 |
| H123 | -0.5801670000  | -32.1608890000 | 29.4667910000 |
| H124 | -2.0108010000  | -30.6574120000 | 27.9380300000 |
| H125 | -4.3240000000  | -29.5768810000 | 25.6896460000 |
| H126 | -3.3079040000  | -25.7273690000 | 27.1348130000 |
| H127 | -5.1175680000  | -25.2782290000 | 25.7917400000 |
| H128 | -8.7196520000  | -28.2926410000 | 27.3046910000 |
| H129 | -9.2723060000  | -26.0055770000 | 26.5344220000 |
| H130 | -9.0861360000  | -30.9875220000 | 28.3908180000 |
| H131 | 3.2712790000   | -32.3595120000 | 28.3144110000 |
| H132 | -1.4217560000  | -25.2221240000 | 24.5787680000 |
| H133 | 0.0891100000   | -25.7122520000 | 24.1996770000 |
| H134 | -8.0230980000  | -23.1344300000 | 23.7901230000 |
| N135 | -6.6075080000  | -24.4946100000 | 23.2951850000 |
| H136 | 5.2635510000   | -32.9382670000 | 24.4989950000 |
| H137 | -7.1105070000  | -37.1816900000 | 19.7322900000 |
| H138 | -6.8901080000  | -38.9135930000 | 20.0671160000 |
| H139 | -4.7137330000  | -25.0550920000 | 21.7228070000 |
| C140 | -5.5860030000  | -25.6409930000 | 21.3980010000 |
| C141 | -6.8140870000  | -25.3233780000 | 22.2220310000 |
| O142 | -7.9112090000  | -25.8126070000 | 21.9674610000 |
| C143 | -5.2576860000  | -27.1523300000 | 21.4775940000 |
| C144 | -4.0542100000  | -27.5047680000 | 20.5960730000 |
| C145 | -5.0299090000  | -27.6096400000 | 22.9231950000 |
| H146 | -5.7032600000  | -24.0602490000 | 23.4074290000 |
| H147 | -5.8019440000  | -25.3658710000 | 20.3585490000 |
| H148 | -6.1387770000  | -27.6773450000 | 21.0960620000 |
| H149 | -3.1446450000  | -27.0020810000 | 20.9528790000 |
| H150 | -4.2162200000  | -27.2067110000 | 19.5514180000 |
| H151 | -3.8678740000  | -28.5841500000 | 20.6234460000 |
| H152 | -5.9255730000  | -27.4684910000 | 23.5374740000 |
| H153 | -4.2083390000  | -27.0451850000 | 23.3889430000 |
| H154 | -4.7564160000  | -28.6688310000 | 22.9626290000 |
| H155 | -7.0102310000  | -29.8718550000 | 27.6221310000 |
| C156 | -11.0219920000 | -37.0395550000 | 21.4210640000 |
| C157 | -10.4387430000 | -36.7972490000 | 22.7989220000 |

|      |                |                |               |
|------|----------------|----------------|---------------|
| O158 | -9.3181250000  | -37.1807860000 | 23.1424750000 |
| N159 | -11.2646260000 | -36.1506310000 | 23.6590810000 |
| C160 | -10.8110160000 | -35.7070390000 | 24.9629140000 |
| H161 | -10.3613710000 | -37.6896860000 | 20.8478340000 |
| H162 | -11.1656100000 | -36.0973590000 | 20.8808590000 |
| H163 | -12.1352910000 | -35.7815250000 | 23.3044050000 |
| H164 | -10.0101950000 | -34.9626310000 | 24.8741650000 |
| H165 | -11.6517740000 | -35.2506330000 | 25.4907320000 |
| H166 | -11.9911370000 | -37.5203900000 | 21.5567550000 |
| H167 | -10.4290790000 | -36.5298610000 | 25.5672320000 |
| O168 | -2.3858170000  | -30.6216390000 | 23.2079600000 |
| O169 | -3.6159700000  | -30.7987100000 | 23.6966480000 |

**F' (doublet, +1)**

|     |               |                |               |
|-----|---------------|----------------|---------------|
| C1  | -0.8191000000 | -26.0151690000 | 24.4889320000 |
| C2  | -0.7207900000 | -26.8403800000 | 25.7963260000 |
| C3  | -2.0582830000 | -27.4061510000 | 26.1645570000 |
| N4  | -2.4361370000 | -28.7209380000 | 25.9165360000 |
| C5  | -3.1586710000 | -26.7223170000 | 26.5986440000 |
| C6  | -3.7374970000 | -28.8101690000 | 26.1592810000 |
| N7  | -4.2264310000 | -27.6119230000 | 26.5782510000 |
| C8  | -7.7230370000 | -24.0380360000 | 24.0959740000 |
| C9  | -7.4822770000 | -24.0621410000 | 25.6173860000 |
| C10 | -7.2112770000 | -25.4446160000 | 26.1661800000 |
| C11 | -8.2124890000 | -26.2857270000 | 26.6676010000 |
| C12 | -5.9091340000 | -25.9408090000 | 26.1405050000 |
| C13 | -7.9093770000 | -27.5632650000 | 27.1463090000 |
| C14 | -5.5880320000 | -27.2028710000 | 26.6358320000 |
| C15 | -6.5904880000 | -28.0396920000 | 27.1555600000 |
| O16 | -6.2195600000 | -29.2442950000 | 27.6478820000 |
| C17 | 2.9850290000  | -33.3740230000 | 28.0369720000 |
| C18 | 3.1554190000  | -33.5600930000 | 26.5285910000 |
| O19 | 2.6351060000  | -34.4913900000 | 25.9203170000 |
| C20 | 1.4931890000  | -33.6522900000 | 28.3819260000 |
| C21 | 0.4951910000  | -32.7230150000 | 27.7262520000 |
| N22 | -0.4475400000 | -32.0305060000 | 28.4730490000 |
| C23 | 0.2379880000  | -32.3425370000 | 26.4283560000 |
| C24 | -1.1935330000 | -31.2564140000 | 27.6403710000 |
| N25 | -0.7915440000 | -31.4101450000 | 26.3874150000 |
| N26 | 3.8885380000  | -32.5883790000 | 25.9097480000 |
| C27 | 4.2949170000  | -32.6900560000 | 24.5160030000 |
| C28 | 4.1384990000  | -31.3567680000 | 23.7499690000 |
| C29 | 2.7231650000  | -30.9019550000 | 23.6313150000 |
| N30 | 2.0118700000  | -30.8689590000 | 22.4374500000 |
| C31 | 1.8129870000  | -30.5416560000 | 24.5887680000 |
| C32 | 0.7314290000  | -30.5076310000 | 22.7057720000 |
| N33 | 0.5841450000  | -30.3268990000 | 24.0060180000 |
| C34 | -7.0446160000 | -37.0266000000 | 19.9117830000 |



|      |               |                |               |
|------|---------------|----------------|---------------|
| C35  | -5.7565470000 | -36.8981210000 | 20.7437190000 |
| C36  | -5.7389200000 | -35.6799960000 | 21.6132090000 |
| N37  | -6.7775270000 | -35.3652230000 | 22.4731250000 |
| C38  | -4.8184610000 | -34.6753960000 | 21.7819690000 |
| C39  | -6.4680540000 | -34.2192120000 | 23.1132030000 |
| N40  | -5.2836140000 | -33.7765500000 | 22.7214320000 |
| Cu41 | -1.3374490000 | -30.0667510000 | 24.7532630000 |
| Fe42 | -4.3115660000 | -32.0779000000 | 23.4799420000 |
| C43  | -1.4276620000 | -32.9344480000 | 21.8438260000 |
| C44  | -3.4738160000 | -34.0909880000 | 26.0958270000 |
| C45  | -7.1486900000 | -31.0917210000 | 25.1330660000 |
| C46  | -5.4681650000 | -30.5842970000 | 20.6364440000 |
| N47  | -5.9761790000 | -31.0437760000 | 22.9818940000 |
| C48  | -1.6617350000 | -33.5135310000 | 23.0899560000 |
| C49  | -0.7804400000 | -34.4345250000 | 23.7320590000 |
| C50  | -1.3689110000 | -34.7890430000 | 24.9250410000 |
| C51  | -2.6132610000 | -34.0574340000 | 25.0035670000 |
| C52  | -0.6945670000 | -35.5715790000 | 25.9602170000 |
| O53  | -1.0999590000 | -35.7545200000 | 27.1015830000 |
| N54  | -5.1575690000 | -32.5094260000 | 25.2675880000 |
| C55  | -4.6405260000 | -33.3596230000 | 26.2130280000 |
| C56  | -5.5114610000 | -33.4103090000 | 27.3719920000 |
| C57  | -6.5607040000 | -32.5734600000 | 27.1001430000 |
| C58  | -6.3173590000 | -32.0020680000 | 25.7822780000 |
| C59  | -5.2700140000 | -34.2793240000 | 28.5697380000 |
| N60  | -2.7756850000 | -33.3116870000 | 23.8718510000 |
| C61  | -6.9866990000 | -30.6564370000 | 23.8265090000 |
| C62  | -7.9502450000 | -29.8261530000 | 23.1248260000 |
| C63  | -7.5541130000 | -29.8023800000 | 21.8081170000 |
| C64  | -6.2840050000 | -30.5244030000 | 21.7534680000 |
| C65  | -9.0894210000 | -29.0880340000 | 23.7574200000 |
| C66  | -8.2010680000 | -29.1708150000 | 20.6640190000 |
| C67  | -9.5105430000 | -28.9102020000 | 20.5446850000 |
| N68  | -3.5725930000 | -31.7807410000 | 21.6293890000 |
| C69  | -4.1838160000 | -31.1135200000 | 20.6068800000 |
| C70  | -3.2904400000 | -31.0041770000 | 19.4607120000 |
| C71  | -2.1370270000 | -31.6280040000 | 19.8292900000 |
| C72  | -2.3250110000 | -32.1290630000 | 21.1695140000 |
| C73  | -3.6130230000 | -30.3119530000 | 18.1736220000 |
| C74  | -7.8309160000 | -32.4858360000 | 27.8917870000 |
| O75  | -8.2670360000 | -31.1060370000 | 27.9634090000 |
| C76  | -8.9186810000 | -33.3713340000 | 27.2601760000 |
| H77  | 0.1822850000  | -34.7564320000 | 23.3535800000 |
| H78  | -1.2387210000 | -31.7622200000 | 19.2387330000 |
| H79  | -1.2159160000 | -26.6818730000 | 23.7128260000 |
| H80  | -0.0149180000 | -27.6665480000 | 25.6494120000 |
| H81  | -0.3315170000 | -26.2210080000 | 26.6150590000 |
| H82  | -8.5373050000 | -24.7324710000 | 23.8656580000 |
| H83  | -6.6491920000 | -23.3928660000 | 25.8737010000 |
| H84  | -8.3750330000 | -23.6360780000 | 26.0919190000 |

|      |                |                |               |
|------|----------------|----------------|---------------|
| H85  | 3.6248600000   | -34.0877800000 | 28.5668180000 |
| H86  | 1.2630990000   | -34.6817700000 | 28.0886730000 |
| H87  | 1.3666100000   | -33.5964050000 | 29.4697060000 |
| H88  | 3.6963550000   | -33.4834900000 | 24.0657670000 |
| H89  | 4.7388340000   | -30.5870480000 | 24.2536070000 |
| H90  | 4.5867210000   | -31.4815580000 | 22.7560690000 |
| H91  | -7.9204690000  | -37.1128310000 | 20.5644510000 |
| H92  | -5.6355470000  | -37.7988090000 | 21.3623100000 |
| H93  | -4.8827120000  | -36.8574640000 | 20.0840610000 |
| H94  | -5.9314910000  | -34.0214200000 | 29.4018500000 |
| H95  | -4.2377080000  | -34.1842990000 | 28.9248090000 |
| H96  | -5.4284380000  | -35.3398440000 | 28.3358500000 |
| H97  | -10.0338650000 | -29.6476440000 | 23.7136480000 |
| H98  | -9.2355390000  | -28.1342010000 | 23.2381020000 |
| H99  | -8.8806820000  | -28.8644030000 | 24.8084560000 |
| H100 | -2.7805540000  | -30.3927500000 | 17.4687060000 |
| H101 | -3.8131810000  | -29.2459560000 | 18.3380600000 |
| H102 | -4.5020880000  | -30.7402950000 | 17.6946070000 |
| H103 | -7.6333790000  | -32.8385120000 | 28.9125840000 |
| H104 | -8.5258660000  | -34.3828740000 | 27.1140020000 |
| H105 | -9.2063970000  | -32.9670100000 | 26.2846160000 |
| H106 | -9.8097930000  | -33.4561350000 | 27.8942260000 |
| H107 | -0.4910300000  | -33.1762960000 | 21.3515090000 |
| H108 | -5.8276680000  | -30.1235870000 | 19.7250400000 |
| H109 | -7.5547940000  | -28.8955290000 | 19.8330330000 |
| H110 | -10.2298660000 | -29.1720240000 | 21.3135150000 |
| H111 | -9.9011590000  | -28.4161890000 | 19.6607230000 |
| H112 | -8.0105900000  | -30.7342640000 | 25.6788790000 |
| H113 | -3.1685750000  | -34.7258910000 | 26.9176770000 |
| H114 | 0.3002700000   | -35.9531820000 | 25.6547300000 |
| H115 | -7.1029510000  | -33.7354620000 | 23.8382050000 |
| H116 | -7.6451900000  | -35.8916740000 | 22.6010070000 |
| H117 | -3.8626890000  | -34.5359540000 | 21.3022840000 |
| H118 | -0.0619340000  | -30.3561670000 | 21.9903300000 |
| H119 | 2.3951350000   | -31.0387670000 | 21.5183410000 |
| H120 | 1.9535500000   | -30.4599550000 | 25.6537970000 |
| H121 | 4.3901330000   | -31.9303440000 | 26.4918790000 |
| H122 | 0.7154920000   | -32.6835370000 | 25.5274680000 |
| H123 | -0.5801510000  | -32.1608510000 | 29.4668290000 |
| H124 | -1.9865380000  | -30.5975970000 | 27.9612260000 |
| H125 | -4.3470230000  | -29.6840150000 | 26.0009310000 |
| H126 | -3.2803770000  | -25.6987090000 | 26.9137250000 |
| H127 | -5.1232730000  | -25.3382380000 | 25.6997300000 |
| H128 | -8.6958870000  | -28.1999680000 | 27.5428830000 |
| H129 | -9.2442690000  | -25.9436740000 | 26.6904010000 |
| H130 | -9.0669880000  | -31.0664500000 | 28.5110660000 |
| H131 | 3.2711920000   | -32.3595160000 | 28.3144280000 |
| H132 | -1.4216880000  | -25.2220540000 | 24.5787930000 |
| H133 | 0.0891290000   | -25.7122140000 | 24.1996590000 |
| H134 | -8.0231070000  | -23.1343920000 | 23.7901000000 |

|      |                |                |               |
|------|----------------|----------------|---------------|
| N135 | -6.6114350000  | -24.4927160000 | 23.2843530000 |
| H136 | 5.2636930000   | -32.9382100000 | 24.4989740000 |
| H137 | -7.1837100000  | -36.1501810000 | 19.2693180000 |
| H138 | -7.0073620000  | -37.9175610000 | 19.2761820000 |
| H139 | -4.7497600000  | -24.9893210000 | 21.6880020000 |
| C140 | -5.5860310000  | -25.6410060000 | 21.3980060000 |
| C141 | -6.8004470000  | -25.3981060000 | 22.2700120000 |
| O142 | -7.8493510000  | -26.0154840000 | 22.1111180000 |
| C143 | -5.1324380000  | -27.1179960000 | 21.4749660000 |
| C144 | -3.8094990000  | -27.3181550000 | 20.7259690000 |
| C145 | -5.0298950000  | -27.6096340000 | 22.9232080000 |
| H146 | -5.7628070000  | -23.9443490000 | 23.2781010000 |
| H147 | -5.8524920000  | -25.3909950000 | 20.3644290000 |
| H148 | -5.9114260000  | -27.7067030000 | 20.9833240000 |
| H149 | -3.0020950000  | -26.7422710000 | 21.1955510000 |
| H150 | -3.8869840000  | -26.9990390000 | 19.6785300000 |
| H151 | -3.5063930000  | -28.3701360000 | 20.7443430000 |
| H152 | -5.9855590000  | -27.5261290000 | 23.4480300000 |
| H153 | -4.2795850000  | -27.0333670000 | 23.4826410000 |
| H154 | -4.7285700000  | -28.6608770000 | 22.9611090000 |
| H155 | -2.6040610000  | -29.0866200000 | 23.0641230000 |
| C156 | -11.0220330000 | -37.0394900000 | 21.4210300000 |
| C157 | -10.4135240000 | -36.6174660000 | 22.7358740000 |
| O158 | -9.1968200000  | -36.6414830000 | 22.9496750000 |
| N159 | -11.2806890000 | -36.1724210000 | 23.6725330000 |
| C160 | -10.8110290000 | -35.7070430000 | 24.9628890000 |
| H161 | -10.3458660000 | -37.7337000000 | 20.9192640000 |
| H162 | -11.1570700000 | -36.1636920000 | 20.7755990000 |
| H163 | -12.2727100000 | -36.2096980000 | 23.4900040000 |
| H164 | -10.0041600000 | -34.9804530000 | 24.8292660000 |
| H165 | -11.6376510000 | -35.2286990000 | 25.4927440000 |
| H166 | -11.9911860000 | -37.5204730000 | 21.5567680000 |
| H167 | -10.4290670000 | -36.5298540000 | 25.5672380000 |
| O168 | -1.6359070000  | -29.1068800000 | 23.1393070000 |
| O169 | -3.5202600000  | -30.8035960000 | 24.1285020000 |
| H170 | -6.9984810000  | -29.8123460000 | 27.8338580000 |

**F<sub>R</sub>**(triplet, 0)

|     |               |                |               |
|-----|---------------|----------------|---------------|
| C1  | -0.8190970000 | -26.0150850000 | 24.4890520000 |
| C2  | -0.6955820000 | -26.8021950000 | 25.8179090000 |
| C3  | -2.0237460000 | -27.3622550000 | 26.2156510000 |
| N4  | -2.3895180000 | -28.6676120000 | 25.9307020000 |
| C5  | -3.1172100000 | -26.6795160000 | 26.6740610000 |
| C6  | -3.6810530000 | -28.7652680000 | 26.1856250000 |
| N7  | -4.1837350000 | -27.5753970000 | 26.6460630000 |
| C8  | -7.7230970000 | -24.0379980000 | 24.0959970000 |
| C9  | -7.4629420000 | -24.0595090000 | 25.6135730000 |
| C10 | -7.1854550000 | -25.4404540000 | 26.1637080000 |

|      |               |                |               |
|------|---------------|----------------|---------------|
| C11  | -8.1927580000 | -26.3020380000 | 26.6112330000 |
| C12  | -5.8745950000 | -25.9148520000 | 26.1848390000 |
| C13  | -7.8844470000 | -27.5783560000 | 27.0905670000 |
| C14  | -5.5451180000 | -27.1791970000 | 26.6713500000 |
| C15  | -6.5593670000 | -28.0332620000 | 27.1468260000 |
| O16  | -6.1966770000 | -29.2358510000 | 27.6521590000 |
| C17  | 2.9850150000  | -33.3740350000 | 28.0369680000 |
| C18  | 3.1961060000  | -33.6015400000 | 26.5431840000 |
| O19  | 2.7617370000  | -34.5924000000 | 25.9625360000 |
| C20  | 1.5094210000  | -33.6759070000 | 28.4034500000 |
| C21  | 0.4951530000  | -32.7812190000 | 27.7404140000 |
| N22  | -0.4692650000 | -32.0917130000 | 28.4627130000 |
| C23  | 0.2231630000  | -32.4674640000 | 26.4283310000 |
| C24  | -1.2586860000 | -31.4067400000 | 27.5769790000 |
| N25  | -0.8550500000 | -31.6072060000 | 26.3376620000 |
| N26  | 3.8821030000  | -32.6092410000 | 25.9095970000 |
| C27  | 4.2949790000  | -32.6900940000 | 24.5159090000 |
| C28  | 4.0885110000  | -31.3425410000 | 23.7868140000 |
| C29  | 2.6606950000  | -30.9038600000 | 23.6579250000 |
| N30  | 2.0052170000  | -30.8320790000 | 22.4325580000 |
| C31  | 1.7059950000  | -30.5352000000 | 24.5751460000 |
| C32  | 0.7221760000  | -30.4403080000 | 22.6479320000 |
| N33  | 0.5093200000  | -30.2659910000 | 23.9421160000 |
| C34  | -7.0255360000 | -37.1408960000 | 19.9820580000 |
| C35  | -5.7350280000 | -36.9741550000 | 20.8040180000 |
| C36  | -5.7303630000 | -35.7393840000 | 21.6492560000 |
| N37  | -6.7607340000 | -35.4321400000 | 22.5238690000 |
| C38  | -4.8288170000 | -34.7122040000 | 21.7863080000 |
| C39  | -6.4569770000 | -34.2657510000 | 23.1391810000 |
| N40  | -5.2924190000 | -33.8064160000 | 22.7170750000 |
| Cu41 | -1.6642510000 | -30.2413430000 | 24.3058030000 |
| Fe42 | -4.3099870000 | -32.0993080000 | 23.4578630000 |
| C43  | -1.4337780000 | -32.9824750000 | 21.8113250000 |
| C44  | -3.4559430000 | -34.0464440000 | 26.1012990000 |
| C45  | -7.1674180000 | -31.1101260000 | 25.1018710000 |
| C46  | -5.4491600000 | -30.5809080000 | 20.6231330000 |
| N47  | -5.9787600000 | -31.0384620000 | 22.9614520000 |
| C48  | -1.6620180000 | -33.5416110000 | 23.0710390000 |
| C49  | -0.7860170000 | -34.4634970000 | 23.7189290000 |
| C50  | -1.3689060000 | -34.7890430000 | 24.9250410000 |
| C51  | -2.6032070000 | -34.0371970000 | 24.9994090000 |
| C52  | -0.7037180000 | -35.5836300000 | 25.9498980000 |
| O53  | -1.1107800000 | -35.8048320000 | 27.0865120000 |
| N54  | -5.1601400000 | -32.4972420000 | 25.2631870000 |
| C55  | -4.6271610000 | -33.3182260000 | 26.2210830000 |
| C56  | -5.4906400000 | -33.3593180000 | 27.3888470000 |
| C57  | -6.5587920000 | -32.5516780000 | 27.1009310000 |
| C58  | -6.3239550000 | -32.0017010000 | 25.7679690000 |
| C59  | -5.2192210000 | -34.1850740000 | 28.6104370000 |
| N60  | -2.7624550000 | -33.3068430000 | 23.8603060000 |

|      |                |                |               |
|------|----------------|----------------|---------------|
| C61  | -7.0009270000  | -30.6707290000 | 23.7948270000 |
| C62  | -7.9676310000  | -29.8419550000 | 23.0890410000 |
| C63  | -7.5534590000  | -29.7988800000 | 21.7789540000 |
| C64  | -6.2760540000  | -30.5171600000 | 21.7358210000 |
| C65  | -9.1149180000  | -29.1127190000 | 23.7182580000 |
| C66  | -8.1868980000  | -29.1544930000 | 20.6361330000 |
| C67  | -9.4958120000  | -28.8986660000 | 20.4892830000 |
| N68  | -3.5575610000  | -31.7971950000 | 21.6055760000 |
| C69  | -4.1685070000  | -31.1270620000 | 20.5866850000 |
| C70  | -3.2859690000  | -31.0427720000 | 19.4262520000 |
| C71  | -2.1396810000  | -31.6832430000 | 19.7861230000 |
| C72  | -2.3230010000  | -32.1685560000 | 21.1353660000 |
| C73  | -3.6081370000  | -30.3512000000 | 18.1379090000 |
| C74  | -7.8288340000  | -32.4714160000 | 27.8903880000 |
| O75  | -8.2760150000  | -31.0917400000 | 27.9615000000 |
| C76  | -8.9148340000  | -33.3647800000 | 27.2639770000 |
| H77  | 0.1688360000   | -34.8064380000 | 23.3380780000 |
| H78  | -1.2481330000  | -31.8317050000 | 19.1878870000 |
| H79  | -1.2233640000  | -26.6914620000 | 23.7242490000 |
| H80  | 0.0070160000   | -27.6321130000 | 25.6817800000 |
| H81  | -0.2934690000  | -26.1500970000 | 26.6058900000 |
| H82  | -8.5410070000  | -24.7317540000 | 23.8754580000 |
| H83  | -6.6245230000  | -23.3906020000 | 25.8548240000 |
| H84  | -8.3481390000  | -23.6280840000 | 26.0994450000 |
| H85  | 3.6369760000   | -34.0707740000 | 28.5782590000 |
| H86  | 1.3001730000   | -34.7157290000 | 28.1274780000 |
| H87  | 1.3967000000   | -33.6084330000 | 29.4928040000 |
| H88  | 3.7024050000   | -33.4847760000 | 24.0579130000 |
| H89  | 4.6730030000   | -30.5714300000 | 24.3100740000 |
| H90  | 4.5425300000   | -31.4251730000 | 22.7903400000 |
| H91  | -7.8965670000  | -37.2185780000 | 20.6426790000 |
| H92  | -5.5956930000  | -37.8637120000 | 21.4359680000 |
| H93  | -4.8666530000  | -36.9318200000 | 20.1367840000 |
| H94  | -5.8922270000  | -33.9311750000 | 29.4356960000 |
| H95  | -4.1914900000  | -34.0363620000 | 28.9617560000 |
| H96  | -5.3310150000  | -35.2584110000 | 28.4079210000 |
| H97  | -10.0536080000 | -29.6848890000 | 23.6897870000 |
| H98  | -9.2799990000  | -28.1668150000 | 23.1899090000 |
| H99  | -8.9005780000  | -28.8739780000 | 24.7651880000 |
| H100 | -2.7862460000  | -30.4563100000 | 17.4224780000 |
| H101 | -3.7809940000  | -29.2790850000 | 18.2963140000 |
| H102 | -4.5142860000  | -30.7594300000 | 17.6716630000 |
| H103 | -7.6309880000  | -32.8201640000 | 28.9131240000 |
| H104 | -8.5126360000  | -34.3732410000 | 27.1204760000 |
| H105 | -9.1999060000  | -32.9652370000 | 26.2856900000 |
| H106 | -9.8097930000  | -33.4561350000 | 27.8942260000 |
| H107 | -0.5024810000  | -33.2402500000 | 21.3156890000 |
| H108 | -5.8021630000  | -30.1135370000 | 19.7112670000 |
| H109 | -7.5259410000  | -28.8647690000 | 19.8208310000 |
| H110 | -10.2318560000 | -29.1791550000 | 21.2358650000 |

|      |                |                |               |
|------|----------------|----------------|---------------|
| H111 | -9.8678930000  | -28.3889620000 | 19.6055510000 |
| H112 | -8.0375880000  | -30.7584300000 | 25.6400950000 |
| H113 | -3.1422420000  | -34.6686130000 | 26.9304540000 |
| H114 | 0.2872420000   | -35.9733510000 | 25.6344850000 |
| H115 | -7.0832170000  | -33.7827760000 | 23.8728520000 |
| H116 | -7.6095730000  | -35.9753070000 | 22.6774200000 |
| H117 | -3.8816270000  | -34.5602040000 | 21.2919810000 |
| H118 | -0.0526390000  | -30.2648870000 | 21.9106390000 |
| H119 | 2.4192160000   | -31.0137650000 | 21.5301070000 |
| H120 | 1.7943840000   | -30.4782120000 | 25.6479660000 |
| H121 | 4.2508700000   | -31.8492970000 | 26.4640730000 |
| H122 | 0.7258630000   | -32.8240510000 | 25.5459960000 |
| H123 | -0.5801530000  | -32.1608510000 | 29.4668350000 |
| H124 | -2.0846090000  | -30.7735820000 | 27.8664610000 |
| H125 | -4.2824940000  | -29.6337030000 | 25.9701630000 |
| H126 | -3.2393140000  | -25.6634330000 | 27.0144330000 |
| H127 | -5.0811250000  | -25.2951200000 | 25.7828220000 |
| H128 | -8.6739880000  | -28.2356610000 | 27.4462570000 |
| H129 | -9.2313250000  | -25.9795280000 | 26.5904140000 |
| H130 | -9.0513330000  | -31.0492860000 | 28.5425050000 |
| H131 | 3.2711960000   | -32.3595050000 | 28.3144420000 |
| H132 | -1.4217220000  | -25.2220670000 | 24.5787490000 |
| H133 | 0.0891520000   | -25.7122800000 | 24.1996020000 |
| H134 | -8.0230670000  | -23.1344150000 | 23.7900810000 |
| N135 | -6.6192830000  | -24.4989970000 | 23.2804390000 |
| H136 | 5.2636620000   | -32.9381870000 | 24.4990390000 |
| H137 | -7.1782210000  | -36.2818300000 | 19.3191590000 |
| H138 | -6.9834370000  | -38.0481530000 | 19.3686390000 |
| H139 | -4.7454930000  | -25.0028100000 | 21.7066330000 |
| C140 | -5.5860260000  | -25.6410160000 | 21.3980060000 |
| C141 | -6.8148070000  | -25.3700310000 | 22.2387680000 |
| O142 | -7.8962140000  | -25.9058990000 | 22.0123290000 |
| C143 | -5.1489940000  | -27.1228870000 | 21.4740100000 |
| C144 | -3.8407510000  | -27.3191800000 | 20.6987900000 |
| C145 | -5.0298930000  | -27.6096310000 | 22.9232010000 |
| H146 | -5.7216760000  | -24.0452980000 | 23.3662090000 |
| H147 | -5.8275560000  | -25.3821180000 | 20.3598160000 |
| H148 | -5.9369030000  | -27.7056540000 | 20.9889510000 |
| H149 | -3.0115980000  | -26.7940350000 | 21.1875780000 |
| H150 | -3.9267870000  | -26.9450210000 | 19.6690060000 |
| H151 | -3.5628550000  | -28.3753910000 | 20.6583080000 |
| H152 | -5.9957940000  | -27.5749990000 | 23.4366070000 |
| H153 | -4.3203900000  | -26.9870870000 | 23.4860610000 |
| H154 | -4.6561680000  | -28.6351170000 | 22.9828410000 |
| H155 | -2.6942950000  | -29.4886700000 | 22.3799650000 |
| C156 | -11.0220450000 | -37.0394970000 | 21.4210220000 |
| C157 | -10.4123990000 | -36.6560860000 | 22.7498740000 |
| O158 | -9.2066220000  | -36.7534480000 | 22.9904820000 |
| N159 | -11.2781580000 | -36.1723140000 | 23.6713100000 |
| C160 | -10.8110350000 | -35.7070430000 | 24.9628930000 |

|      |                |                |               |
|------|----------------|----------------|---------------|
| H161 | -10.3498020000 | -37.7242770000 | 20.9016270000 |
| H162 | -11.1577570000 | -36.1476330000 | 20.7983720000 |
| H163 | -12.2620660000 | -36.1252400000 | 23.4525170000 |
| H164 | -10.0028900000 | -34.9799800000 | 24.8361400000 |
| H165 | -11.6388260000 | -35.2290500000 | 25.4912720000 |
| H166 | -11.9911780000 | -37.5204700000 | 21.5567680000 |
| H167 | -10.4290620000 | -36.5298540000 | 25.5672380000 |
| O168 | -1.7673760000  | -29.3269620000 | 22.6091800000 |
| O169 | -3.5258150000  | -30.7274780000 | 24.1963330000 |
| H170 | -6.9773380000  | -29.8128680000 | 27.7982010000 |

**O<sub>B</sub>** (quintet, +1)

|     |               |                |               |
|-----|---------------|----------------|---------------|
| C1  | -0.8188620000 | -26.0150660000 | 24.4889300000 |
| C2  | -0.7381750000 | -26.9302520000 | 25.7338940000 |
| C3  | -2.0800300000 | -27.5216220000 | 26.0376070000 |
| N4  | -2.4875880000 | -28.7931860000 | 25.6500260000 |
| C5  | -3.1711670000 | -26.8562090000 | 26.5199850000 |
| C6  | -3.7975010000 | -28.8717210000 | 25.8642940000 |
| N7  | -4.2580830000 | -27.7086790000 | 26.3959870000 |
| C8  | -7.7228740000 | -24.0381160000 | 24.0959550000 |
| C9  | -7.4563690000 | -24.0587020000 | 25.6110590000 |
| C10 | -7.1915530000 | -25.4508840000 | 26.1294990000 |
| C11 | -8.2076880000 | -26.2898810000 | 26.6039160000 |
| C12 | -5.9012640000 | -25.9704840000 | 26.0661130000 |
| C13 | -7.9299180000 | -27.5876580000 | 27.0320800000 |
| C14 | -5.6085360000 | -27.2624440000 | 26.4984950000 |
| C15 | -6.6206100000 | -28.0903840000 | 27.0072980000 |
| O16 | -6.2754830000 | -29.3151740000 | 27.4650940000 |
| C17 | 2.9851990000  | -33.3739850000 | 28.0369550000 |
| C18 | 3.1581840000  | -33.5653570000 | 26.5312710000 |
| O19 | 2.6302230000  | -34.4929890000 | 25.9243530000 |
| C20 | 1.5071120000  | -33.6607250000 | 28.4017090000 |
| C21 | 0.5264940000  | -32.7216570000 | 27.7493570000 |
| N22 | -0.4120290000 | -32.0191920000 | 28.4869140000 |
| C23 | 0.2977010000  | -32.3278580000 | 26.4531100000 |
| C24 | -1.1482900000 | -31.2435840000 | 27.6563380000 |
| N25 | -0.7258270000 | -31.3942410000 | 26.4132270000 |
| N26 | 3.8902470000  | -32.5937420000 | 25.9123670000 |
| C27 | 4.2947060000  | -32.6899800000 | 24.5164340000 |
| C28 | 4.0186490000  | -31.3778020000 | 23.7411900000 |
| C29 | 2.5618490000  | -31.0618460000 | 23.5482030000 |
| N30 | 1.8748990000  | -31.3455810000 | 22.3710540000 |
| C31 | 1.6031070000  | -30.5330430000 | 24.3753600000 |
| C32 | 0.5735810000  | -30.9939580000 | 22.5205540000 |
| N33 | 0.3699220000  | -30.5114290000 | 23.7377070000 |
| C34 | -7.0503710000 | -37.4911460000 | 20.2679210000 |
| C35 | -5.7889040000 | -37.2641940000 | 21.1188600000 |
| C36 | -5.7819330000 | -35.9477880000 | 21.8305610000 |

|      |               |                |               |
|------|---------------|----------------|---------------|
| N37  | -6.8035350000 | -35.5367430000 | 22.6701320000 |
| C38  | -4.8715440000 | -34.9204250000 | 21.8516040000 |
| C39  | -6.4838110000 | -34.3129080000 | 23.1532690000 |
| N40  | -5.3164940000 | -33.9098360000 | 22.6803360000 |
| Cu41 | -1.5348690000 | -30.3854030000 | 24.7529660000 |
| Fe42 | -4.1644440000 | -31.9828000000 | 23.2206380000 |
| C43  | -1.5179640000 | -33.4715000000 | 21.5512070000 |
| C44  | -3.4348220000 | -33.8406560000 | 26.0252340000 |
| C45  | -7.1439120000 | -30.9737420000 | 24.7436120000 |
| C46  | -5.3414780000 | -30.8024160000 | 20.2326410000 |
| N47  | -5.8899620000 | -30.9988250000 | 22.6237950000 |
| C48  | -1.6810030000 | -33.8165470000 | 22.9067780000 |
| C49  | -0.8194110000 | -34.6750560000 | 23.6618080000 |
| C50  | -1.3689800000 | -34.7890320000 | 24.9250200000 |
| C51  | -2.5673720000 | -33.9798970000 | 24.9340740000 |
| C52  | -0.7171700000 | -35.4837150000 | 26.0308690000 |
| O53  | -1.0972130000 | -35.4953350000 | 27.1970810000 |
| N54  | -5.1058930000 | -32.2747340000 | 25.1110880000 |
| C55  | -4.6171620000 | -33.1079790000 | 26.0852110000 |
| C56  | -5.5648260000 | -33.1807250000 | 27.1818870000 |
| C57  | -6.6444960000 | -32.4085500000 | 26.8228820000 |
| C58  | -6.3338770000 | -31.8311690000 | 25.5124360000 |
| C59  | -5.3786110000 | -34.0218770000 | 28.4097270000 |
| N60  | -2.7185550000 | -33.4163860000 | 23.7071420000 |
| C61  | -6.9362880000 | -30.5889700000 | 23.4158250000 |
| C62  | -7.8803750000 | -29.8140470000 | 22.6146410000 |
| C63  | -7.4201690000 | -29.8584670000 | 21.3169560000 |
| C64  | -6.1569450000 | -30.5931680000 | 21.3461760000 |
| C65  | -9.0964320000 | -29.1080820000 | 23.1227460000 |
| C66  | -8.0455090000 | -29.3636760000 | 20.0903220000 |
| C67  | -8.7179220000 | -28.2113670000 | 19.9531570000 |
| N68  | -3.5358540000 | -32.1193350000 | 21.2314780000 |
| C69  | -4.1235280000 | -31.4897540000 | 20.1802620000 |
| C70  | -3.2996230000 | -31.6534790000 | 18.9837670000 |
| C71  | -2.2246380000 | -32.4002570000 | 19.3678130000 |
| C72  | -2.3739640000 | -32.6931110000 | 20.7792110000 |
| C73  | -3.6062000000 | -31.0774750000 | 17.6372830000 |
| C74  | -7.9178830000 | -32.3355790000 | 27.6247330000 |
| O75  | -8.4462390000 | -30.9867800000 | 27.5506740000 |
| C76  | -8.9756580000 | -33.3594670000 | 27.1763900000 |
| H77  | 0.0929170000  | -35.1381840000 | 23.3052520000 |
| H78  | -1.3994420000 | -32.7296140000 | 18.7476020000 |
| H79  | -1.2251290000 | -26.6129340000 | 23.6593360000 |
| H80  | -0.0224230000 | -27.7382680000 | 25.5402930000 |
| H81  | -0.3649520000 | -26.3674530000 | 26.5985300000 |
| H82  | -8.5324590000 | -24.7379860000 | 23.8720610000 |
| H83  | -6.6103960000 | -23.3997820000 | 25.8505330000 |
| H84  | -8.3345070000 | -23.6268270000 | 26.1068820000 |
| H85  | 3.6372050000  | -34.0809970000 | 28.5620710000 |
| H86  | 1.2662250000  | -34.6858710000 | 28.1037330000 |



|      |               |                |               |
|------|---------------|----------------|---------------|
| H87  | 1.3878160000  | -33.6072390000 | 29.4902060000 |
| H88  | 3.7183700000  | -33.5142590000 | 24.0889780000 |
| H89  | 4.5021750000  | -30.5432010000 | 24.2644440000 |
| H90  | 4.5156210000  | -31.4444220000 | 22.7645110000 |
| H91  | -7.9433980000 | -37.4858440000 | 20.9012180000 |
| H92  | -5.6953310000 | -38.0824470000 | 21.8473510000 |
| H93  | -4.8939280000 | -37.3096350000 | 20.4878640000 |
| H94  | -6.0239440000 | -33.6976010000 | 29.2323420000 |
| H95  | -4.3438070000 | -33.9811360000 | 28.7658940000 |
| H96  | -5.6052370000 | -35.0776940000 | 28.2122970000 |
| H97  | -9.8694670000 | -29.0716170000 | 22.3474060000 |
| H98  | -8.8546500000 | -28.0682390000 | 23.3786790000 |
| H99  | -9.5157390000 | -29.5891840000 | 24.0127740000 |
| H100 | -2.8415440000 | -31.3570920000 | 16.9065820000 |
| H101 | -3.6486520000 | -29.9816470000 | 17.6791440000 |
| H102 | -4.5762320000 | -31.4248330000 | 17.2596280000 |
| H103 | -7.6635980000 | -32.5407870000 | 28.6732030000 |
| H104 | -8.5127410000 | -34.3475690000 | 27.0853520000 |
| H105 | -9.3727520000 | -33.0725630000 | 26.1973690000 |
| H106 | -9.8098350000 | -33.4561500000 | 27.8942640000 |
| H107 | -0.6467680000 | -33.8856510000 | 21.0508980000 |
| H108 | -5.6850030000 | -30.3695410000 | 19.2994520000 |
| H109 | -7.9398930000 | -30.0137830000 | 19.2209800000 |
| H110 | -8.7868180000 | -27.4844210000 | 20.7545890000 |
| H111 | -9.1654490000 | -27.9481660000 | 18.9981000000 |
| H112 | -8.0485960000 | -30.6183050000 | 25.2200200000 |
| H113 | -3.1511650000 | -34.4103240000 | 26.9018250000 |
| H114 | 0.2287740000  | -35.9894260000 | 25.7510970000 |
| H115 | -7.1076960000 | -33.7504230000 | 23.8308010000 |
| H116 | -7.6648610000 | -36.0493810000 | 22.8645650000 |
| H117 | -3.9291780000 | -34.8450550000 | 21.3329890000 |
| H118 | -0.1827120000 | -31.0370430000 | 21.7498170000 |
| H119 | 2.2841980000  | -31.7135110000 | 21.5236680000 |
| H120 | 1.7077340000  | -30.2056900000 | 25.3975830000 |
| H121 | 4.3766650000  | -31.9231150000 | 26.4923020000 |
| H122 | 0.7778800000  | -32.6677440000 | 25.5532930000 |
| H123 | -0.5801860000 | -32.1609150000 | 29.4666790000 |
| H124 | -1.9534860000 | -30.5962540000 | 27.9699970000 |
| H125 | -4.4186170000 | -29.7190950000 | 25.6211640000 |
| H126 | -3.2750530000 | -25.8624940000 | 26.9247890000 |
| H127 | -5.1070070000 | -25.3685280000 | 25.6395870000 |
| H128 | -8.7261830000 | -28.2229100000 | 27.4086170000 |
| H129 | -9.2314670000 | -25.9260220000 | 26.6448920000 |
| H130 | -9.2124420000 | -30.9245510000 | 28.1432630000 |
| H131 | 3.2712030000  | -32.3595430000 | 28.3144110000 |
| H132 | -1.4218470000 | -25.2220820000 | 24.5788000000 |
| H133 | 0.0891240000  | -25.7121790000 | 24.1996120000 |
| H134 | -8.0232390000 | -23.1343840000 | 23.7901020000 |
| N135 | -6.6067050000 | -24.4733430000 | 23.2795870000 |
| H136 | 5.2637210000  | -32.9382930000 | 24.4987430000 |

|      |                |                |               |
|------|----------------|----------------|---------------|
| H137 | -7.1588160000  | -36.7032240000 | 19.5140150000 |
| H138 | -7.0019550000  | -38.4568860000 | 19.7530120000 |
| H139 | -4.7317160000  | -25.0163190000 | 21.6948390000 |
| C140 | -5.5860000000  | -25.6409850000 | 21.3980450000 |
| C141 | -6.7906460000  | -25.3816410000 | 22.2758880000 |
| O142 | -7.8489390000  | -25.9932610000 | 22.1340270000 |
| C143 | -5.1960740000  | -27.1337470000 | 21.4694600000 |
| C144 | -3.9417490000  | -27.3818840000 | 20.6289980000 |
| C145 | -5.0299300000  | -27.6096290000 | 22.9231800000 |
| H146 | -5.7655830000  | -23.9137650000 | 23.2702180000 |
| H147 | -5.8480250000  | -25.3770120000 | 20.3666650000 |
| H148 | -6.0258450000  | -27.6939010000 | 21.0292720000 |
| H149 | -3.0816650000  | -26.8319910000 | 21.0404820000 |
| H150 | -4.0833930000  | -27.0374770000 | 19.5964660000 |
| H151 | -3.6767860000  | -28.4415400000 | 20.6048430000 |
| H152 | -5.9737430000  | -27.5586190000 | 23.4731480000 |
| H153 | -4.2931030000  | -26.9893570000 | 23.4551830000 |
| H154 | -4.6693220000  | -28.6422540000 | 22.9571800000 |
| H155 | -2.3548740000  | -30.0518090000 | 22.1197170000 |
| C156 | -11.0220210000 | -37.0395550000 | 21.4210410000 |
| C157 | -10.4231850000 | -36.6938970000 | 22.7656570000 |
| O158 | -9.2317610000  | -36.8653600000 | 23.0418210000 |
| N159 | -11.2797030000 | -36.1631130000 | 23.6687740000 |
| C160 | -10.8109960000 | -35.7070270000 | 24.9628940000 |
| H161 | -10.3545870000 | -37.7166820000 | 20.8869970000 |
| H162 | -11.1611650000 | -36.1333810000 | 20.8207150000 |
| H163 | -12.2520420000 | -36.0466920000 | 23.4238570000 |
| H164 | -10.0014740000 | -34.9799270000 | 24.8398820000 |
| H165 | -11.6382990000 | -35.2303540000 | 25.4929430000 |
| H166 | -11.9911580000 | -37.5204010000 | 21.5567610000 |
| H167 | -10.4290950000 | -36.5298690000 | 25.5672470000 |
| O168 | -1.7975760000  | -29.6769580000 | 21.3923570000 |
| O169 | -3.0193030000  | -30.6732350000 | 23.6111090000 |
| H170 | -1.6299050000  | -28.7676030000 | 21.6800290000 |
| H171 | -7.0836250000  | -29.8590680000 | 27.6077230000 |

**O<sub>BR</sub>** (sextet, 0)

|     |               |                |               |
|-----|---------------|----------------|---------------|
| C1  | -0.8188620000 | -26.0150660000 | 24.4889300000 |
| C2  | -0.7212910000 | -26.8187980000 | 25.8090520000 |
| C3  | -2.0572040000 | -27.3916760000 | 26.1547280000 |
| N4  | -2.4305390000 | -28.6572270000 | 25.7362940000 |
| C5  | -3.1555480000 | -26.7480560000 | 26.6535680000 |
| C6  | -3.7284560000 | -28.7700810000 | 25.9499260000 |
| N7  | -4.2255930000 | -27.6269230000 | 26.5178280000 |
| C8  | -7.7228740000 | -24.0381160000 | 24.0959550000 |
| C9  | -7.4753910000 | -24.0584660000 | 25.6138440000 |
| C10 | -7.2036140000 | -25.4470690000 | 26.1375180000 |
| C11 | -8.2194630000 | -26.3205720000 | 26.5423490000 |

|      |               |                |               |
|------|---------------|----------------|---------------|
| C12  | -5.8969030000 | -25.9282950000 | 26.1388530000 |
| C13  | -7.9236470000 | -27.6154960000 | 26.9715400000 |
| C14  | -5.5830240000 | -27.2143710000 | 26.5710700000 |
| C15  | -6.5994720000 | -28.0764900000 | 27.0175130000 |
| O16  | -6.2422550000 | -29.2940600000 | 27.4823300000 |
| C17  | 2.9851990000  | -33.3739850000 | 28.0369550000 |
| C18  | 3.2023480000  | -33.6008910000 | 26.5438750000 |
| O19  | 2.7791650000  | -34.5977550000 | 25.9659670000 |
| C20  | 1.5106280000  | -33.6614910000 | 28.3982300000 |
| C21  | 0.5287800000  | -32.7293280000 | 27.7462430000 |
| N22  | -0.4444130000 | -32.0630800000 | 28.4729540000 |
| C23  | 0.2982540000  | -32.3537750000 | 26.4430500000 |
| C24  | -1.2080550000 | -31.3348120000 | 27.6094360000 |
| N25  | -0.7720010000 | -31.4833450000 | 26.3741380000 |
| N26  | 3.8755130000  | -32.6005820000 | 25.9064120000 |
| C27  | 4.2947060000  | -32.6899800000 | 24.5164340000 |
| C28  | 4.0478320000  | -31.3667760000 | 23.7563100000 |
| C29  | 2.6051760000  | -31.0012190000 | 23.5793570000 |
| N30  | 1.8726630000  | -31.3337900000 | 22.4452110000 |
| C31  | 1.7001910000  | -30.3592070000 | 24.3889120000 |
| C32  | 0.5965080000  | -30.8867450000 | 22.6029570000 |
| N33  | 0.4600800000  | -30.2976130000 | 23.7806720000 |
| C34  | -7.0401990000 | -37.8304860000 | 20.4940150000 |
| C35  | -5.7759890000 | -37.5175210000 | 21.3147300000 |
| C36  | -5.8202660000 | -36.1856800000 | 21.9954930000 |
| N37  | -6.8163100000 | -35.8247150000 | 22.8891490000 |
| C38  | -4.9884190000 | -35.0928230000 | 21.9353430000 |
| C39  | -6.5506490000 | -34.5586090000 | 23.3132270000 |
| N40  | -5.4506050000 | -34.0888790000 | 22.7588480000 |
| Cu41 | -1.4833770000 | -30.2867890000 | 24.6993240000 |
| Fe42 | -4.2087150000 | -31.9571130000 | 23.2769530000 |
| C43  | -1.6205700000 | -33.5023990000 | 21.5427930000 |
| C44  | -3.4236190000 | -33.8384210000 | 26.0621380000 |
| C45  | -7.2111920000 | -31.0521030000 | 24.8090840000 |
| C46  | -5.4838600000 | -30.8670900000 | 20.2737920000 |
| N47  | -6.0187520000 | -31.0787560000 | 22.6619950000 |
| C48  | -1.7447990000 | -33.8322720000 | 22.9074800000 |
| C49  | -0.8535640000 | -34.6756740000 | 23.6464390000 |
| C50  | -1.3689800000 | -34.7890320000 | 24.9250200000 |
| C51  | -2.5773340000 | -33.9861870000 | 24.9531270000 |
| C52  | -0.6973850000 | -35.4904060000 | 26.0078200000 |
| O53  | -1.0741770000 | -35.5684700000 | 27.1748030000 |
| N54  | -5.1415220000 | -32.3171120000 | 25.1597610000 |
| C55  | -4.6147040000 | -33.1161190000 | 26.1384260000 |
| C56  | -5.5329680000 | -33.1709670000 | 27.2634320000 |
| C57  | -6.6313850000 | -32.4240720000 | 26.9080680000 |
| C58  | -6.3634630000 | -31.8817080000 | 25.5724850000 |
| C59  | -5.2980890000 | -33.9673270000 | 28.5129720000 |
| N60  | -2.7617740000 | -33.4307060000 | 23.7294600000 |
| C61  | -7.0446290000 | -30.6724800000 | 23.4712680000 |

|      |               |                |               |
|------|---------------|----------------|---------------|
| C62  | -7.9992700000 | -29.8844890000 | 22.6905840000 |
| C63  | -7.5511810000 | -29.9088310000 | 21.3887900000 |
| C64  | -6.2915570000 | -30.6586930000 | 21.3965990000 |
| C65  | -9.2094840000 | -29.1865980000 | 23.2254890000 |
| C66  | -8.1829810000 | -29.3889260000 | 20.1775300000 |
| C67  | -8.8518340000 | -28.2323470000 | 20.0571350000 |
| N68  | -3.6674070000 | -32.1959270000 | 21.2403010000 |
| C69  | -4.2682790000 | -31.5623460000 | 20.2023620000 |
| C70  | -3.4562550000 | -31.7141380000 | 18.9931340000 |
| C71  | -2.3735040000 | -32.4555440000 | 19.3600880000 |
| C72  | -2.5066830000 | -32.7520710000 | 20.7747750000 |
| C73  | -3.7751350000 | -31.1230930000 | 17.6551650000 |
| C74  | -7.9004980000 | -32.3589550000 | 27.7051620000 |
| O75  | -8.4164370000 | -31.0008430000 | 27.6755680000 |
| C76  | -8.9626750000 | -33.3488810000 | 27.1978510000 |
| H77  | 0.0534600000  | -35.1336170000 | 23.2689250000 |
| H78  | -1.5481450000 | -32.7681010000 | 18.7307210000 |
| H79  | -1.2291880000 | -26.6674540000 | 23.7080020000 |
| H80  | -0.0086290000 | -27.6421430000 | 25.6841050000 |
| H81  | -0.3486420000 | -26.1712860000 | 26.6138820000 |
| H82  | -8.5346730000 | -24.7347770000 | 23.8676070000 |
| H83  | -6.6385100000 | -23.3913710000 | 25.8650400000 |
| H84  | -8.3647550000 | -23.6321260000 | 26.0960520000 |
| H85  | 3.6331990000  | -34.0736540000 | 28.5787660000 |
| H86  | 1.2752960000  | -34.6906170000 | 28.1049440000 |
| H87  | 1.3957870000  | -33.6083340000 | 29.4882980000 |
| H88  | 3.7156700000  | -33.5041050000 | 24.0734180000 |
| H89  | 4.5619230000  | -30.5525910000 | 24.2848070000 |
| H90  | 4.5395980000  | -31.4396420000 | 22.7766460000 |
| H91  | -7.9194670000 | -37.8675730000 | 21.1455630000 |
| H92  | -5.6236010000 | -38.3175130000 | 22.0546280000 |
| H93  | -4.8944060000 | -37.5301090000 | 20.6633210000 |
| H94  | -5.9452160000 | -33.6440960000 | 29.3356380000 |
| H95  | -4.2602550000 | -33.8703690000 | 28.8506740000 |
| H96  | -5.4800240000 | -35.0386010000 | 28.3528670000 |
| H97  | -9.9763630000 | -29.0941720000 | 22.4481120000 |
| H98  | -8.9591050000 | -28.1674460000 | 23.5497890000 |
| H99  | -9.6427700000 | -29.7122730000 | 24.0844960000 |
| H100 | -3.0173990000 | -31.3953150000 | 16.9132730000 |
| H101 | -3.8154940000 | -30.0272670000 | 17.7091690000 |
| H102 | -4.7501990000 | -31.4626520000 | 17.2813780000 |
| H103 | -7.6635470000 | -32.6082340000 | 28.7485620000 |
| H104 | -8.5093090000 | -34.3389050000 | 27.0817390000 |
| H105 | -9.3328210000 | -33.0213280000 | 26.2207010000 |
| H106 | -9.8098350000 | -33.4561500000 | 27.8942640000 |
| H107 | -0.7488450000 | -33.9028090000 | 21.0308670000 |
| H108 | -5.8303460000 | -30.4210890000 | 19.3469520000 |
| H109 | -8.0848450000 | -30.0258660000 | 19.2967070000 |
| H110 | -8.9082890000 | -27.5094700000 | 20.8628370000 |
| H111 | -9.3031030000 | -27.9551110000 | 19.1070900000 |

|      |                |                |               |
|------|----------------|----------------|---------------|
| H112 | -8.1050810000  | -30.6983200000 | 25.3091490000 |
| H113 | -3.1155840000  | -34.3918880000 | 26.9417040000 |
| H114 | 0.2675860000   | -35.9532890000 | 25.7104230000 |
| H115 | -7.1653280000  | -34.0208320000 | 24.0216600000 |
| H116 | -7.6400910000  | -36.3745880000 | 23.1209640000 |
| H117 | -4.0827600000  | -34.9633870000 | 21.3619960000 |
| H118 | -0.1941530000  | -30.9463940000 | 21.8639430000 |
| H119 | 2.2293320000   | -31.8034170000 | 21.6256690000 |
| H120 | 1.8499010000   | -29.9691680000 | 25.3848250000 |
| H121 | 4.2289910000   | -31.8305030000 | 26.4566210000 |
| H122 | 0.8086450000   | -32.6717800000 | 25.5496770000 |
| H123 | -0.5801860000  | -32.1609150000 | 29.4666790000 |
| H124 | -2.0425260000  | -30.7162040000 | 27.9051000000 |
| H125 | -4.3301400000  | -29.6205790000 | 25.6683980000 |
| H126 | -3.2835170000  | -25.7659930000 | 27.0809800000 |
| H127 | -5.0980830000  | -25.3002360000 | 25.7606540000 |
| H128 | -8.7185970000  | -28.2842240000 | 27.2894040000 |
| H129 | -9.2556790000  | -25.9899620000 | 26.5247330000 |
| H130 | -9.1601290000  | -30.9422950000 | 28.2958180000 |
| H131 | 3.2712030000   | -32.3595430000 | 28.3144110000 |
| H132 | -1.4218470000  | -25.2220820000 | 24.5788000000 |
| H133 | 0.0891240000   | -25.7121790000 | 24.1996120000 |
| H134 | -8.0232390000  | -23.1343840000 | 23.7901020000 |
| N135 | -6.6070710000  | -24.4898910000 | 23.2914710000 |
| H136 | 5.2637210000   | -32.9382930000 | 24.4987430000 |
| H137 | -7.2084250000  | -37.0581130000 | 19.7345520000 |
| H138 | -6.9484290000  | -38.7987060000 | 19.9874740000 |
| H139 | -4.7239030000  | -25.0367620000 | 21.7152600000 |
| C140 | -5.5860000000  | -25.6409850000 | 21.3980450000 |
| C141 | -6.8067500000  | -25.3392810000 | 22.2371600000 |
| O142 | -7.9054670000  | -25.8423840000 | 22.0080830000 |
| C143 | -5.2178290000  | -27.1421550000 | 21.4722230000 |
| C144 | -3.9733120000  | -27.4108960000 | 20.6208500000 |
| C145 | -5.0299300000  | -27.6096290000 | 22.9231800000 |
| H146 | -5.7098590000  | -24.0374700000 | 23.3878500000 |
| H147 | -5.8173470000  | -25.3700220000 | 20.3607370000 |
| H148 | -6.0604710000  | -27.6957800000 | 21.0454060000 |
| H149 | -3.1129450000  | -26.8389170000 | 20.9999450000 |
| H150 | -4.1340030000  | -27.1101760000 | 19.5766680000 |
| H151 | -3.6905430000  | -28.4664500000 | 20.6429860000 |
| H152 | -5.9667490000  | -27.5552480000 | 23.4876290000 |
| H153 | -4.2892850000  | -26.9824370000 | 23.4418890000 |
| H154 | -4.6603980000  | -28.6399120000 | 22.9662110000 |
| H155 | -2.4311380000  | -30.1121830000 | 22.1644860000 |
| C156 | -11.0220210000 | -37.0395550000 | 21.4210410000 |
| C157 | -10.4347670000 | -36.7956500000 | 22.7986640000 |
| O158 | -9.3140250000  | -37.1742550000 | 23.1425650000 |
| N159 | -11.2635710000 | -36.1497920000 | 23.6589320000 |
| C160 | -10.8109960000 | -35.7070270000 | 24.9628940000 |
| H161 | -10.3614560000 | -37.6883390000 | 20.8462960000 |

|      |                |                |               |
|------|----------------|----------------|---------------|
| H162 | -11.1661230000 | -36.0968210000 | 20.8814160000 |
| H163 | -12.1381660000 | -35.7882390000 | 23.3065050000 |
| H164 | -10.0085080000 | -34.9642830000 | 24.8730200000 |
| H165 | -11.6511270000 | -35.2486310000 | 25.4903110000 |
| H166 | -11.9911580000 | -37.5204010000 | 21.5567610000 |
| H167 | -10.4290950000 | -36.5298690000 | 25.5672470000 |
| O168 | -1.8675350000  | -29.7396390000 | 21.4202210000 |
| O169 | -3.1373330000  | -30.5807440000 | 23.6000920000 |
| H170 | -1.5427350000  | -28.9172740000 | 21.8180140000 |
| H171 | -7.0365680000  | -29.8611830000 | 27.6014630000 |

E (sextet, +1)

|     |               |                |               |
|-----|---------------|----------------|---------------|
| C1  | -0.8189090000 | -26.0151940000 | 24.4889320000 |
| C2  | -0.7356240000 | -26.8813840000 | 25.7651230000 |
| C3  | -2.0789740000 | -27.4454270000 | 26.1025220000 |
| N4  | -2.4645780000 | -28.7344250000 | 25.7642250000 |
| C5  | -3.1670940000 | -26.7752840000 | 26.5896090000 |
| C6  | -3.7603570000 | -28.8284110000 | 26.0352570000 |
| N7  | -4.2419380000 | -27.6498700000 | 26.5299220000 |
| C8  | -7.7228630000 | -24.0381220000 | 24.0959470000 |
| C9  | -7.4607730000 | -24.0508650000 | 25.6119290000 |
| C10 | -7.1995850000 | -25.4388730000 | 26.1414280000 |
| C11 | -8.2242780000 | -26.2974620000 | 26.5549240000 |
| C12 | -5.8989270000 | -25.9333520000 | 26.1457410000 |
| C13 | -7.9446690000 | -27.5955390000 | 26.9821530000 |
| C14 | -5.6006720000 | -27.2232420000 | 26.5846810000 |
| C15 | -6.6281690000 | -28.0756490000 | 27.0210630000 |
| O16 | -6.2926990000 | -29.3127190000 | 27.4615880000 |
| C17 | 2.9851550000  | -33.3739620000 | 28.0369420000 |
| C18 | 3.1612830000  | -33.5758510000 | 26.5332450000 |
| O19 | 2.6517150000  | -34.5189440000 | 25.9337390000 |
| C20 | 1.5185820000  | -33.6701550000 | 28.4208070000 |
| C21 | 0.5202560000  | -32.7642970000 | 27.7537800000 |
| N22 | -0.4565660000 | -32.0958060000 | 28.4712790000 |
| C23 | 0.2759100000  | -32.4153370000 | 26.4455450000 |
| C24 | -1.2317820000 | -31.3877720000 | 27.6082780000 |
| N25 | -0.8037490000 | -31.5561940000 | 26.3713050000 |
| N26 | 3.8844300000  | -32.6015170000 | 25.9104180000 |
| C27 | 4.2946800000  | -32.6899640000 | 24.5164050000 |
| C28 | 4.0572990000  | -31.3619120000 | 23.7622800000 |
| C29 | 2.6140950000  | -31.0104710000 | 23.5711040000 |
| N30 | 1.9154670000  | -31.3147810000 | 22.4098000000 |
| C31 | 1.6768760000  | -30.4307790000 | 24.3894290000 |
| C32 | 0.6247560000  | -30.9165900000 | 22.5571780000 |
| N33 | 0.4457980000  | -30.3807560000 | 23.7560880000 |
| C34 | -7.0125890000 | -37.7797130000 | 20.3946970000 |
| C35 | -5.7490660000 | -37.4918370000 | 21.2244450000 |
| C36 | -5.7718780000 | -36.1527140000 | 21.8930070000 |

|      |               |                |               |
|------|---------------|----------------|---------------|
| N37  | -6.8069550000 | -35.7428860000 | 22.7174190000 |
| C38  | -4.8888900000 | -35.1017490000 | 21.8831670000 |
| C39  | -6.5260490000 | -34.4969220000 | 23.1611460000 |
| N40  | -5.3682880000 | -34.0796090000 | 22.6768820000 |
| Cu41 | -1.3964760000 | -30.2976880000 | 24.7636510000 |
| Fe42 | -4.2813770000 | -32.1575510000 | 23.1784970000 |
| C43  | -1.5436410000 | -33.5093120000 | 21.5391010000 |
| C44  | -3.4480870000 | -33.8713070000 | 26.0191780000 |
| C45  | -7.1963760000 | -31.0510410000 | 24.7374040000 |
| C46  | -5.4162700000 | -30.9082300000 | 20.2106040000 |
| N47  | -5.9696340000 | -31.1117800000 | 22.6031340000 |
| C48  | -1.6909110000 | -33.8288080000 | 22.9010600000 |
| C49  | -0.8181610000 | -34.6689950000 | 23.6637570000 |
| C50  | -1.3690170000 | -34.7890590000 | 24.9250090000 |
| C51  | -2.5789840000 | -33.9997480000 | 24.9295690000 |
| C52  | -0.7190760000 | -35.4866560000 | 26.0351470000 |
| O53  | -1.1445290000 | -35.5610470000 | 27.1812040000 |
| N54  | -5.1581660000 | -32.3592870000 | 25.0872710000 |
| C55  | -4.6405740000 | -33.1556280000 | 26.0774460000 |
| C56  | -5.5612950000 | -33.1924290000 | 27.1960370000 |
| C57  | -6.6499890000 | -32.4323200000 | 26.8361320000 |
| C58  | -6.3753550000 | -31.8977240000 | 25.5036770000 |
| C59  | -5.3394270000 | -33.9832310000 | 28.4509640000 |
| N60  | -2.7324940000 | -33.4319690000 | 23.7007350000 |
| C61  | -7.0023200000 | -30.6767730000 | 23.4037060000 |
| C62  | -7.9218680000 | -29.8710650000 | 22.6123180000 |
| C63  | -7.4659850000 | -29.9180320000 | 21.3092040000 |
| C64  | -6.2287700000 | -30.6890740000 | 21.3252980000 |
| C65  | -9.1122040000 | -29.1276720000 | 23.1280500000 |
| C66  | -8.0777000000 | -29.3855170000 | 20.0921820000 |
| C67  | -8.7266520000 | -28.2173270000 | 19.9758760000 |
| N68  | -3.6063190000 | -32.2301180000 | 21.2064610000 |
| C69  | -4.2021830000 | -31.6022910000 | 20.1547740000 |
| C70  | -3.3750650000 | -31.7526760000 | 18.9611110000 |
| C71  | -2.2872270000 | -32.4823720000 | 19.3465860000 |
| C72  | -2.4309050000 | -32.7764170000 | 20.7560560000 |
| C73  | -3.6814340000 | -31.1729160000 | 17.6159930000 |
| C74  | -7.9158430000 | -32.3490980000 | 27.6439670000 |
| O75  | -8.4494840000 | -31.0034750000 | 27.5506760000 |
| C76  | -8.9607250000 | -33.3831140000 | 27.1967720000 |
| H77  | 0.1044500000  | -35.1151770000 | 23.3124030000 |
| H78  | -1.4507890000 | -32.7871670000 | 18.7291180000 |
| H79  | -1.2258310000 | -26.6345920000 | 23.6766150000 |
| H80  | -0.0404690000 | -27.7125300000 | 25.5970360000 |
| H81  | -0.3446010000 | -26.2880330000 | 26.6013010000 |
| H82  | -8.5332380000 | -24.7373310000 | 23.8731920000 |
| H83  | -6.6159360000 | -23.3907950000 | 25.8517190000 |
| H84  | -8.3410280000 | -23.6137640000 | 26.0996380000 |
| H85  | 3.6480300000  | -34.0738750000 | 28.5594440000 |
| H86  | 1.2925700000  | -34.7073210000 | 28.1510470000 |

|      |               |                |               |
|------|---------------|----------------|---------------|
| H87  | 1.4108100000  | -33.5933270000 | 29.5092740000 |
| H88  | 3.7121840000  | -33.5008810000 | 24.0731910000 |
| H89  | 4.5605300000  | -30.5494120000 | 24.3020100000 |
| H90  | 4.5586430000  | -31.4265980000 | 22.7875250000 |
| H91  | -7.9008560000 | -37.7813150000 | 21.0352340000 |
| H92  | -5.6261210000 | -38.2819480000 | 21.9788800000 |
| H93  | -4.8595830000 | -37.5344350000 | 20.5858520000 |
| H94  | -5.9759970000 | -33.6395680000 | 29.2721080000 |
| H95  | -4.2993250000 | -33.9090390000 | 28.7855910000 |
| H96  | -5.5486910000 | -35.0497280000 | 28.2969670000 |
| H97  | -9.8996430000 | -29.0903070000 | 22.3673230000 |
| H98  | -8.8427360000 | -28.0882000000 | 23.3568310000 |
| H99  | -9.5235640000 | -29.5801750000 | 24.0363560000 |
| H100 | -2.9168340000 | -31.4514560000 | 16.8849260000 |
| H101 | -3.7210810000 | -30.0770890000 | 17.6616440000 |
| H102 | -4.6518120000 | -31.5174030000 | 17.2369160000 |
| H103 | -7.6614970000 | -32.5424610000 | 28.6940900000 |
| H104 | -8.4952320000 | -34.3729520000 | 27.1472230000 |
| H105 | -9.3311480000 | -33.1255150000 | 26.1997320000 |
| H106 | -9.8097910000 | -33.4561000000 | 27.8942470000 |
| H107 | -0.6603320000 | -33.9029430000 | 21.0440830000 |
| H108 | -5.7523810000 | -30.4641820000 | 19.2801230000 |
| H109 | -7.9832630000 | -30.0201760000 | 19.2105750000 |
| H110 | -8.7834270000 | -27.5021000000 | 20.7887900000 |
| H111 | -9.1659470000 | -27.9278950000 | 19.0246810000 |
| H112 | -8.0862420000 | -30.6769370000 | 25.2272470000 |
| H113 | -3.1512400000 | -34.4271550000 | 26.9001060000 |
| H114 | 0.2598010000  | -35.9361720000 | 25.7735120000 |
| H115 | -7.1632850000 | -33.9293520000 | 23.8218610000 |
| H116 | -7.6655770000 | -36.2630230000 | 22.9114910000 |
| H117 | -3.9457010000 | -35.0124660000 | 21.3679870000 |
| H118 | -0.1403560000 | -30.9746460000 | 21.7938590000 |
| H119 | 2.3103650000  | -31.7211280000 | 21.5735610000 |
| H120 | 1.7945300000  | -30.0814930000 | 25.4038490000 |
| H121 | 4.3424130000  | -31.9076390000 | 26.4859350000 |
| H122 | 0.7844650000  | -32.7416760000 | 25.5552440000 |
| H123 | -0.5801570000 | -32.1608660000 | 29.4666730000 |
| H124 | -2.0630350000 | -30.7652260000 | 27.9041880000 |
| H125 | -4.3746450000 | -29.7039570000 | 25.8928180000 |
| H126 | -3.2737690000 | -25.7716460000 | 26.9686300000 |
| H127 | -5.0976370000 | -25.3112010000 | 25.7639810000 |
| H128 | -8.7487980000 | -28.2508830000 | 27.3034780000 |
| H129 | -9.2554000000 | -25.9531560000 | 26.5433580000 |
| H130 | -9.2133680000 | -30.9328120000 | 28.1447910000 |
| H131 | 3.2712140000  | -32.3595430000 | 28.3144150000 |
| H132 | -1.4218280000 | -25.2221490000 | 24.5787910000 |
| H133 | 0.0891170000  | -25.7121240000 | 24.1996730000 |
| H134 | -8.0232220000 | -23.1343920000 | 23.7901120000 |
| N135 | -6.6067150000 | -24.4755920000 | 23.2810130000 |
| H136 | 5.2636750000  | -32.9382860000 | 24.4987600000 |



|      |                |                |               |
|------|----------------|----------------|---------------|
| H137 | -7.1502020000  | -37.0189510000 | 19.6180360000 |
| H138 | -6.9408380000  | -38.7588460000 | 19.9091280000 |
| H139 | -4.7295430000  | -25.0193580000 | 21.6945300000 |
| C140 | -5.5860060000  | -25.6409930000 | 21.3980540000 |
| C141 | -6.7919060000  | -25.3784560000 | 22.2737710000 |
| O142 | -7.8509470000  | -25.9887540000 | 22.1251490000 |
| C143 | -5.2060290000  | -27.1347520000 | 21.4711820000 |
| C144 | -3.9582020000  | -27.4079970000 | 20.6279600000 |
| C145 | -5.0299250000  | -27.6096290000 | 22.9231680000 |
| H146 | -5.7619980000  | -23.9211350000 | 23.2774410000 |
| H147 | -5.8452900000  | -25.3781780000 | 20.3658370000 |
| H148 | -6.0469120000  | -27.6902920000 | 21.0454010000 |
| H149 | -3.0957530000  | -26.8459570000 | 21.0156500000 |
| H150 | -4.1102280000  | -27.0979100000 | 19.5864600000 |
| H151 | -3.6872150000  | -28.4673100000 | 20.6352250000 |
| H152 | -5.9317390000  | -27.4570880000 | 23.5222240000 |
| H153 | -4.1952000000  | -27.0946540000 | 23.4190370000 |
| H154 | -4.8176400000  | -28.6814900000 | 22.9168550000 |
| H155 | -2.3580700000  | -30.1665080000 | 22.0817340000 |
| C156 | -11.0220230000 | -37.0394780000 | 21.4210240000 |
| C157 | -10.4306720000 | -36.7313960000 | 22.7792630000 |
| O158 | -9.2596920000  | -36.9776270000 | 23.0854990000 |
| N159 | -11.2770860000 | -36.1576610000 | 23.6657850000 |
| C160 | -10.8110120000 | -35.7070310000 | 24.9628930000 |
| H161 | -10.3567470000 | -37.7064930000 | 20.8723240000 |
| H162 | -11.1637720000 | -36.1192440000 | 20.8431840000 |
| H163 | -12.2287630000 | -35.9652100000 | 23.3888910000 |
| H164 | -10.0025940000 | -34.9763490000 | 24.8475990000 |
| H165 | -11.6407430000 | -35.2343790000 | 25.4929500000 |
| H166 | -11.9911060000 | -37.5204580000 | 21.5567840000 |
| H167 | -10.4290510000 | -36.5298500000 | 25.5672420000 |
| O168 | -1.8363400000  | -29.8028220000 | 21.3242890000 |
| O169 | -3.1558470000  | -30.6069450000 | 23.5839120000 |
| H170 | -1.4850680000  | -28.9708840000 | 21.6768740000 |
| H171 | -3.6960990000  | -29.8154560000 | 23.7336500000 |
| H172 | -7.1031260000  | -29.8566060000 | 27.5875680000 |

$E_R$  (quintet, 0)

|     |               |                |               |
|-----|---------------|----------------|---------------|
| C1  | -0.8189090000 | -26.0151940000 | 24.4889320000 |
| C2  | -0.7288270000 | -26.8472960000 | 25.7898200000 |
| C3  | -2.0695140000 | -27.4027400000 | 26.1526580000 |
| N4  | -2.4415420000 | -28.6994800000 | 25.8383080000 |
| C5  | -3.1626000000 | -26.7297570000 | 26.6249160000 |
| C6  | -3.7354710000 | -28.8009430000 | 26.0966430000 |
| N7  | -4.2311450000 | -27.6168060000 | 26.5773180000 |
| C8  | -7.7228630000 | -24.0381220000 | 24.0959470000 |
| C9  | -7.4752180000 | -24.0549980000 | 25.6137600000 |
| C10 | -7.2086400000 | -25.4405520000 | 26.1497460000 |

|      |               |                |               |
|------|---------------|----------------|---------------|
| C11  | -8.2279620000 | -26.3086010000 | 26.5579660000 |
| C12  | -5.9022780000 | -25.9222010000 | 26.1679570000 |
| C13  | -7.9356860000 | -27.5974390000 | 27.0052970000 |
| C14  | -5.5908530000 | -27.2027110000 | 26.6213870000 |
| C15  | -6.6125290000 | -28.0592500000 | 27.0692200000 |
| O16  | -6.2633040000 | -29.2718300000 | 27.5502740000 |
| C17  | 2.9851550000  | -33.3739620000 | 28.0369420000 |
| C18  | 3.2051120000  | -33.6020390000 | 26.5442310000 |
| O19  | 2.7927610000  | -34.6041950000 | 25.9688340000 |
| C20  | 1.5145150000  | -33.6676060000 | 28.4021630000 |
| C21  | 0.5360190000  | -32.7338330000 | 27.7513600000 |
| N22  | -0.4369470000 | -32.0652470000 | 28.4750000000 |
| C23  | 0.3160530000  | -32.3525700000 | 26.4487270000 |
| C24  | -1.1932880000 | -31.3313180000 | 27.6125980000 |
| N25  | -0.7495290000 | -31.4779620000 | 26.3800410000 |
| N26  | 3.8727640000  | -32.5983580000 | 25.9053270000 |
| C27  | 4.2946800000  | -32.6899640000 | 24.5164050000 |
| C28  | 4.0573980000  | -31.3682900000 | 23.7530170000 |
| C29  | 2.6177500000  | -31.0032750000 | 23.5692960000 |
| N30  | 1.8757740000  | -31.3822140000 | 22.4570580000 |
| C31  | 1.7212910000  | -30.3299540000 | 24.3614040000 |
| C32  | 0.6001820000  | -30.9325730000 | 22.6094170000 |
| N33  | 0.4754340000  | -30.2928520000 | 23.7628630000 |
| C34  | -7.0152480000 | -37.9277190000 | 20.6139260000 |
| C35  | -5.7770160000 | -37.6128270000 | 21.4728410000 |
| C36  | -5.8270620000 | -36.2664070000 | 22.1237620000 |
| N37  | -6.8294230000 | -35.8845750000 | 23.0028760000 |
| C38  | -4.9972100000 | -35.1745990000 | 22.0396120000 |
| C39  | -6.5709270000 | -34.6079060000 | 23.3961030000 |
| N40  | -5.4684270000 | -34.1528630000 | 22.8350520000 |
| Cu41 | -1.4216640000 | -30.3244380000 | 24.7489380000 |
| Fe42 | -4.3005750000 | -32.1054990000 | 23.2229230000 |
| C43  | -1.6601000000 | -33.5708390000 | 21.5109270000 |
| C44  | -3.3913280000 | -33.7662160000 | 26.0726200000 |
| C45  | -7.2177970000 | -31.0380460000 | 24.7999380000 |
| C46  | -5.5177420000 | -30.9163250000 | 20.2437040000 |
| N47  | -6.0482300000 | -31.0951920000 | 22.6368080000 |
| C48  | -1.7534630000 | -33.8625070000 | 22.8922460000 |
| C49  | -0.8749600000 | -34.7210690000 | 23.6319120000 |
| C50  | -1.3690170000 | -34.7890590000 | 24.9250090000 |
| C51  | -2.5514390000 | -33.9440420000 | 24.9575020000 |
| C52  | -0.6959330000 | -35.4878880000 | 26.0066510000 |
| O53  | -1.0369630000 | -35.5167960000 | 27.1875990000 |
| N54  | -5.1220740000 | -32.2489700000 | 25.1816390000 |
| C55  | -4.5873540000 | -33.0446210000 | 26.1571920000 |
| C56  | -5.5127350000 | -33.1203650000 | 27.2784650000 |
| C57  | -6.6265480000 | -32.3972050000 | 26.9156300000 |
| C58  | -6.3583460000 | -31.8461060000 | 25.5803260000 |
| C59  | -5.2706970000 | -33.9121970000 | 28.5299020000 |
| N60  | -2.7341130000 | -33.4055330000 | 23.7272260000 |

|      |               |                |               |
|------|---------------|----------------|---------------|
| C61  | -7.0640460000 | -30.6744380000 | 23.4515210000 |
| C62  | -8.0154040000 | -29.8803690000 | 22.6711160000 |
| C63  | -7.5712280000 | -29.9113180000 | 21.3654190000 |
| C64  | -6.3216280000 | -30.6814380000 | 21.3699130000 |
| C65  | -9.2156460000 | -29.1654260000 | 23.2068520000 |
| C66  | -8.1981510000 | -29.3782180000 | 20.1579020000 |
| C67  | -8.8736230000 | -28.2239780000 | 20.0447500000 |
| N68  | -3.7160660000 | -32.2789990000 | 21.1957420000 |
| C69  | -4.3096040000 | -31.6318130000 | 20.1638620000 |
| C70  | -3.4960660000 | -31.7834720000 | 18.9507960000 |
| C71  | -2.4189870000 | -32.5354000000 | 19.3149360000 |
| C72  | -2.5553630000 | -32.8341290000 | 20.7330110000 |
| C73  | -3.8047230000 | -31.1808410000 | 17.6154560000 |
| C74  | -7.8985850000 | -32.3505060000 | 27.7097210000 |
| O75  | -8.4217720000 | -30.9922790000 | 27.6844410000 |
| C76  | -8.9588540000 | -33.3424870000 | 27.2004590000 |
| H77  | 0.0068310000  | -35.2231860000 | 23.2494830000 |
| H78  | -1.5913180000 | -32.8409420000 | 18.6844020000 |
| H79  | -1.2273700000 | -26.6531720000 | 23.6938570000 |
| H80  | -0.0380910000 | -27.6850190000 | 25.6391870000 |
| H81  | -0.3294390000 | -26.2276290000 | 26.6038630000 |
| H82  | -8.5340140000 | -24.7353360000 | 23.8670290000 |
| H83  | -6.6367200000 | -23.3891660000 | 25.8628430000 |
| H84  | -8.3631770000 | -23.6232600000 | 26.0936740000 |
| H85  | 3.6379550000  | -34.0710140000 | 28.5769100000 |
| H86  | 1.2786110000  | -34.6955600000 | 28.1057800000 |
| H87  | 1.4002900000  | -33.6160470000 | 29.4922160000 |
| H88  | 3.7158820000  | -33.5038800000 | 24.0724390000 |
| H89  | 4.5686490000  | -30.5536100000 | 24.2835030000 |
| H90  | 4.5553560000  | -31.4443570000 | 22.7766270000 |
| H91  | -7.9175010000 | -37.9399990000 | 21.2339690000 |
| H92  | -5.6608770000 | -38.3979190000 | 22.2347090000 |
| H93  | -4.8732900000 | -37.6494060000 | 20.8534890000 |
| H94  | -5.9224580000 | -33.5964390000 | 29.3522260000 |
| H95  | -4.2342530000 | -33.8027530000 | 28.8683990000 |
| H96  | -5.4386790000 | -34.9860190000 | 28.3714850000 |
| H97  | -9.9942090000 | -29.0878310000 | 22.4392340000 |
| H98  | -8.9594760000 | -28.1394750000 | 23.5047230000 |
| H99  | -9.6375210000 | -29.6704330000 | 24.0835990000 |
| H100 | -3.0527110000 | -31.4626920000 | 16.8710170000 |
| H101 | -3.8256110000 | -30.0844840000 | 17.6741120000 |
| H102 | -4.7861650000 | -31.5005340000 | 17.2404420000 |
| H103 | -7.6625630000 | -32.6009330000 | 28.7531260000 |
| H104 | -8.5012500000 | -34.3305130000 | 27.0837250000 |
| H105 | -9.3267740000 | -33.0145030000 | 26.2228490000 |
| H106 | -9.8097910000 | -33.4561000000 | 27.8942470000 |
| H107 | -0.7991080000 | -33.9894370000 | 20.9938600000 |
| H108 | -5.8590130000 | -30.4663720000 | 19.3160760000 |
| H109 | -8.0869680000 | -30.0004690000 | 19.2683050000 |
| H110 | -8.9465890000 | -27.5126720000 | 20.8590720000 |

|      |                |                |               |
|------|----------------|----------------|---------------|
| H111 | -9.3155020000  | -27.9363940000 | 19.0933530000 |
| H112 | -8.1164480000  | -30.6890960000 | 25.2961390000 |
| H113 | -3.0831840000  | -34.3182910000 | 26.9535220000 |
| H114 | 0.2372290000   | -36.0041540000 | 25.6943610000 |
| H115 | -7.1885160000  | -34.0510600000 | 24.0864330000 |
| H116 | -7.6593730000  | -36.4262540000 | 23.2314450000 |
| H117 | -4.0883280000  | -35.0543980000 | 21.4694140000 |
| H118 | -0.1922170000  | -31.0275230000 | 21.8752080000 |
| H119 | 2.2228200000   | -31.8911990000 | 21.6571120000 |
| H120 | 1.8805630000   | -29.9002360000 | 25.3396490000 |
| H121 | 4.2145310000   | -31.8212760000 | 26.4527890000 |
| H122 | 0.8272310000   | -32.6696050000 | 25.5555480000 |
| H123 | -0.5801570000  | -32.1608660000 | 29.4666730000 |
| H124 | -2.0273150000  | -30.7111000000 | 27.9050370000 |
| H125 | -4.3424290000  | -29.6806410000 | 25.9372810000 |
| H126 | -3.2819700000  | -25.7206040000 | 26.9856510000 |
| H127 | -5.1042010000  | -25.2979660000 | 25.7825810000 |
| H128 | -8.7329560000  | -28.2638950000 | 27.3212010000 |
| H129 | -9.2638750000  | -25.9785160000 | 26.5277080000 |
| H130 | -9.1678420000  | -30.9397740000 | 28.3023740000 |
| H131 | 3.2712140000   | -32.3595430000 | 28.3144150000 |
| H132 | -1.4218280000  | -25.2221490000 | 24.5787910000 |
| H133 | 0.0891170000   | -25.7121240000 | 24.1996730000 |
| H134 | -8.0232220000  | -23.1343920000 | 23.7901120000 |
| N135 | -6.6055630000  | -24.4864730000 | 23.2911010000 |
| H136 | 5.2636750000   | -32.9382860000 | 24.4987600000 |
| H137 | -7.1452560000  | -37.1697350000 | 19.8328300000 |
| H138 | -6.9169920000  | -38.9075240000 | 20.1313690000 |
| H139 | -4.7201380000  | -25.0410250000 | 21.7138540000 |
| C140 | -5.5860060000  | -25.6409930000 | 21.3980540000 |
| C141 | -6.8072300000  | -25.3327450000 | 22.2345120000 |
| O142 | -7.9026580000  | -25.8435920000 | 22.0106140000 |
| C143 | -5.2368040000  | -27.1432530000 | 21.4749890000 |
| C144 | -4.0122940000  | -27.4505940000 | 20.6083180000 |
| C145 | -5.0299250000  | -27.6096290000 | 22.9231680000 |
| H146 | -5.7137420000  | -24.0213490000 | 23.3780800000 |
| H147 | -5.8137070000  | -25.3727460000 | 20.3594860000 |
| H148 | -6.0986670000  | -27.6859950000 | 21.0738240000 |
| H149 | -3.1387060000  | -26.8788620000 | 20.9556060000 |
| H150 | -4.1901990000  | -27.1773800000 | 19.5599630000 |
| H151 | -3.7416530000  | -28.5095370000 | 20.6481610000 |
| H152 | -5.8952900000  | -27.3922630000 | 23.5572410000 |
| H153 | -4.1456780000  | -27.1394750000 | 23.3773120000 |
| H154 | -4.8915290000  | -28.6929230000 | 22.9279500000 |
| H155 | -2.3552890000  | -30.1821420000 | 22.0295330000 |
| C156 | -11.0220230000 | -37.0394780000 | 21.4210240000 |
| C157 | -10.4400210000 | -36.8092310000 | 22.8036670000 |
| O158 | -9.3329940000  | -37.2180020000 | 23.1570840000 |
| N159 | -11.2626260000 | -36.1473310000 | 23.6578370000 |
| C160 | -10.8110120000 | -35.7070310000 | 24.9628930000 |

|      |                |                |               |
|------|----------------|----------------|---------------|
| H161 | -10.3616630000 | -37.6860960000 | 20.8435290000 |
| H162 | -11.1652890000 | -36.0931090000 | 20.8883210000 |
| H163 | -12.1172370000 | -35.7529750000 | 23.2916090000 |
| H164 | -10.0099890000 | -34.9620930000 | 24.8772350000 |
| H165 | -11.6523040000 | -35.2513470000 | 25.4907230000 |
| H166 | -11.9911060000 | -37.5204580000 | 21.5567840000 |
| H167 | -10.4290510000 | -36.5298500000 | 25.5672420000 |
| O168 | -1.8211620000  | -29.8471790000 | 21.2470340000 |
| O169 | -3.0524050000  | -30.4888530000 | 23.5119460000 |
| H170 | -1.4566450000  | -29.0184880000 | 21.5944080000 |
| H171 | -3.5702990000  | -29.6843090000 | 23.6525250000 |
| H172 | -7.0570810000  | -29.8464280000 | 27.6503370000 |

**I<sub>P</sub>** (singlet, +1)

|     |               |                |               |
|-----|---------------|----------------|---------------|
| C1  | -0.8190000000 | -26.0150010000 | 24.4890000000 |
| C2  | -0.7258540000 | -26.7272590000 | 25.8624990000 |
| C3  | -2.0694930000 | -27.2698730000 | 26.2210670000 |
| N4  | -2.4564000000 | -28.5444320000 | 25.8198990000 |
| C5  | -3.1588220000 | -26.6304650000 | 26.7307570000 |
| C6  | -3.7407130000 | -28.6782210000 | 26.0810390000 |
| N7  | -4.2284550000 | -27.5206510000 | 26.6371670000 |
| C8  | -7.7229990000 | -24.0380000000 | 24.0960010000 |
| C9  | -7.4927970000 | -24.0217250000 | 25.6265300000 |
| C10 | -7.2124930000 | -25.3928700000 | 26.1795010000 |
| C11 | -8.2526170000 | -26.2977750000 | 26.5254150000 |
| C12 | -5.8903010000 | -25.8346880000 | 26.2507020000 |
| C13 | -7.9752120000 | -27.5837100000 | 26.9254990000 |
| C14 | -5.5755050000 | -27.1241740000 | 26.6469730000 |
| C15 | -6.6161470000 | -28.0733530000 | 27.0210650000 |
| O16 | -6.3316510000 | -29.2404920000 | 27.4071960000 |
| C17 | 2.9850000000  | -33.3740010000 | 28.0370010000 |
| C18 | 3.1619060000  | -33.5706210000 | 26.5313260000 |
| O19 | 2.6407180000  | -34.5026400000 | 25.9243850000 |
| C20 | 1.5064690000  | -33.6417540000 | 28.3965020000 |
| C21 | 0.5421380000  | -32.6867260000 | 27.7421880000 |
| N22 | -0.4455940000 | -32.0543670000 | 28.4773120000 |
| C23 | 0.3396810000  | -32.2435570000 | 26.4544350000 |
| C24 | -1.1885290000 | -31.2791540000 | 27.6507280000 |
| N25 | -0.7268670000 | -31.3637470000 | 26.4176480000 |
| N26 | 3.8926690000  | -32.5993310000 | 25.9114760000 |
| C27 | 4.2949990000  | -32.6899990000 | 24.5160010000 |
| C28 | 4.0565920000  | -31.3716870000 | 23.7452260000 |
| C29 | 2.6163690000  | -30.9855250000 | 23.6314300000 |
| N30 | 1.7430060000  | -31.5530990000 | 22.7141080000 |
| C31 | 1.8358190000  | -30.1217350000 | 24.3565770000 |
| C32 | 0.5048280000  | -31.0270710000 | 22.9107840000 |
| N33 | 0.5296980000  | -30.1550520000 | 23.9055920000 |
| C34 | -6.8306390000 | -37.7512700000 | 20.5502620000 |

|      |               |                |               |
|------|---------------|----------------|---------------|
| C35  | -5.6485370000 | -37.4503210000 | 21.4889430000 |
| C36  | -5.7101740000 | -36.0834730000 | 22.0963500000 |
| N37  | -6.7941940000 | -35.6372680000 | 22.8359950000 |
| C38  | -4.8223930000 | -35.0394780000 | 22.0957320000 |
| C39  | -6.5402810000 | -34.3809550000 | 23.2518200000 |
| N40  | -5.3480030000 | -33.9892010000 | 22.8247660000 |
| Cu41 | -1.2215070000 | -29.8811260000 | 25.0218410000 |
| Fe42 | -4.4248260000 | -32.2652660000 | 23.3162780000 |
| C43  | -1.6566100000 | -33.3941540000 | 21.6144240000 |
| C44  | -3.3971290000 | -33.9013330000 | 26.1223110000 |
| C45  | -7.2303450000 | -31.1791740000 | 24.9855380000 |
| C46  | -5.6027960000 | -30.8569870000 | 20.4477370000 |
| N47  | -6.0881360000 | -31.2299880000 | 22.8175540000 |
| C48  | -1.7839490000 | -33.7667350000 | 22.9533210000 |
| C49  | -0.8775520000 | -34.6234970000 | 23.6480410000 |
| C50  | -1.3690000000 | -34.7890010000 | 24.9249990000 |
| C51  | -2.5835760000 | -33.9974520000 | 24.9946900000 |
| C52  | -0.6577780000 | -35.4901700000 | 25.9930340000 |
| O53  | -1.0106090000 | -35.5648420000 | 27.1640830000 |
| N54  | -5.1572370000 | -32.4587630000 | 25.1979500000 |
| C55  | -4.5921360000 | -33.2105600000 | 26.2006050000 |
| C56  | -5.4691950000 | -33.2432060000 | 27.3618930000 |
| C57  | -6.5816410000 | -32.5179790000 | 27.0298920000 |
| C58  | -6.3533720000 | -32.0091020000 | 25.6822190000 |
| C59  | -5.1715470000 | -33.9936870000 | 28.6257780000 |
| N60  | -2.8122790000 | -33.3947450000 | 23.7900920000 |
| C61  | -7.0888110000 | -30.8018110000 | 23.6589370000 |
| C62  | -8.0460360000 | -29.9808060000 | 22.9377920000 |
| C63  | -7.6380400000 | -29.9742260000 | 21.6240600000 |
| C64  | -6.3935360000 | -30.7353550000 | 21.5798680000 |
| C65  | -9.2318930000 | -29.2889230000 | 23.5307310000 |
| C66  | -8.2880910000 | -29.4135480000 | 20.4409680000 |
| C67  | -9.0167880000 | -28.2885360000 | 20.3817420000 |
| N68  | -3.7453460000 | -32.1285130000 | 21.4200610000 |
| C69  | -4.3677100000 | -31.4908050000 | 20.3843520000 |
| C70  | -3.5553180000 | -31.5561260000 | 19.1767880000 |
| C71  | -2.4416990000 | -32.2630690000 | 19.5192640000 |
| C72  | -2.5677010000 | -32.6230510000 | 20.9118370000 |
| C73  | -3.9125820000 | -30.9541680000 | 17.8524420000 |
| C74  | -7.8691860000 | -32.4035910000 | 27.8147750000 |
| O75  | -8.4486860000 | -31.1010860000 | 27.7595690000 |
| C76  | -8.9034390000 | -33.4083980000 | 27.2762150000 |
| H77  | 0.0308680000  | -35.0486300000 | 23.2368640000 |
| H78  | -1.6071010000 | -32.5334970000 | 18.8825840000 |
| H79  | -1.2253070000 | -26.7029360000 | 23.7380980000 |
| H80  | -0.0041200000 | -27.5517900000 | 25.8161450000 |
| H81  | -0.3744320000 | -26.0218470000 | 26.6255910000 |
| H82  | -8.5282930000 | -24.7414090000 | 23.8672600000 |
| H83  | -6.6674290000 | -23.3404580000 | 25.8723550000 |
| H84  | -8.3974740000 | -23.6017630000 | 26.0839880000 |

|      |                |                |               |
|------|----------------|----------------|---------------|
| H85  | 3.6316200000   | -34.0835300000 | 28.5660170000 |
| H86  | 1.2518010000   | -34.6648750000 | 28.1008760000 |
| H87  | 1.3855540000   | -33.5856860000 | 29.4853650000 |
| H88  | 3.7140780000   | -33.5084880000 | 24.0827730000 |
| H89  | 4.5969510000   | -30.5567070000 | 24.2429560000 |
| H90  | 4.5097060000   | -31.4696900000 | 22.7489200000 |
| H91  | -7.7781480000  | -37.7064860000 | 21.0981390000 |
| H92  | -5.6178580000  | -38.2071460000 | 22.2857910000 |
| H93  | -4.7004420000  | -37.5353320000 | 20.9453050000 |
| H94  | -5.8663510000  | -33.7237400000 | 29.4264370000 |
| H95  | -4.1542600000  | -33.7870100000 | 28.9802670000 |
| H96  | -5.2410450000  | -35.0792010000 | 28.4770410000 |
| H97  | -10.0423690000 | -29.2247370000 | 22.7968790000 |
| H98  | -8.9749910000  | -28.2596470000 | 23.8143370000 |
| H99  | -9.6089860000  | -29.7984100000 | 24.4233650000 |
| H100 | -3.1299620000  | -31.1505660000 | 17.1136720000 |
| H101 | -4.0415120000  | -29.8662170000 | 17.9257830000 |
| H102 | -4.8532370000  | -31.3637680000 | 17.4621520000 |
| H103 | -7.6530100000  | -32.6640550000 | 28.8636360000 |
| H104 | -8.4653180000  | -34.4122920000 | 27.2412550000 |
| H105 | -9.1904550000  | -33.1186100000 | 26.2591250000 |
| H106 | -9.8097580000  | -33.4560620000 | 27.8942110000 |
| H107 | -0.7907900000  | -33.7672920000 | 21.0731930000 |
| H108 | -5.9615020000  | -30.3883300000 | 19.5387860000 |
| H109 | -8.1601400000  | -29.9932350000 | 19.5259380000 |
| H110 | -9.1276910000  | -27.6213170000 | 21.2260970000 |
| H111 | -9.4781140000  | -27.9810370000 | 19.4465080000 |
| H112 | -8.0950270000  | -30.8288970000 | 25.5328080000 |
| H113 | -3.0569890000  | -34.4474450000 | 26.9931340000 |
| H114 | 0.3008280000   | -35.9448780000 | 25.6713180000 |
| H115 | -7.2113470000  | -33.7835040000 | 23.8483390000 |
| H116 | -7.6663820000  | -36.1500280000 | 22.9961490000 |
| H117 | -3.8502250000  | -34.9733660000 | 21.6371000000 |
| H118 | -0.3757700000  | -31.3097950000 | 22.3548200000 |
| H119 | 1.9832650000   | -32.2400170000 | 22.0133530000 |
| H120 | 2.1244450000   | -29.4979690000 | 25.1893580000 |
| H121 | 4.3562050000   | -31.9099850000 | 26.4878200000 |
| H122 | 0.8723440000   | -32.5072360000 | 25.5566710000 |
| H123 | -0.5801620000  | -32.1608920000 | 29.4668080000 |
| H124 | -2.0265420000  | -30.6751980000 | 27.9663160000 |
| H125 | -4.3481450000  | -29.5356100000 | 25.8393100000 |
| H126 | -3.2769050000  | -25.6479360000 | 27.1578270000 |
| H127 | -5.0981860000  | -25.1683310000 | 25.9273660000 |
| H128 | -8.7635580000  | -28.2852630000 | 27.1830960000 |
| H129 | -9.2853430000  | -25.9632760000 | 26.4596600000 |
| H130 | -7.7158520000  | -30.4514600000 | 27.8051010000 |
| H131 | 3.2712730000   | -32.3595090000 | 28.3144090000 |
| H132 | -1.4217630000  | -25.2221430000 | 24.5787600000 |
| H133 | 0.0890980000   | -25.7122920000 | 24.1996460000 |
| H134 | -8.0231320000  | -23.1344800000 | 23.7901080000 |

|      |                |                |               |
|------|----------------|----------------|---------------|
| N135 | -6.5930730000  | -24.4787430000 | 23.3042050000 |
| H136 | 5.2635440000   | -32.9382590000 | 24.4989890000 |
| H137 | -6.8719330000  | -37.0249750000 | 19.7304290000 |
| H138 | -6.7336490000  | -38.7530710000 | 20.1178020000 |
| H139 | -4.7162010000  | -25.0401420000 | 21.6991080000 |
| C140 | -5.5860000000  | -25.6410010000 | 21.3980010000 |
| C141 | -6.7903000000  | -25.3684600000 | 22.2781410000 |
| O142 | -7.8563510000  | -25.9576970000 | 22.1252560000 |
| C143 | -5.2436170000  | -27.1522480000 | 21.4725070000 |
| C144 | -4.0241100000  | -27.4881340000 | 20.6077270000 |
| C145 | -5.0299140000  | -27.6096400000 | 22.9231870000 |
| H146 | -5.7615790000  | -23.9041730000 | 23.2828810000 |
| H147 | -5.8422810000  | -25.3695300000 | 20.3670770000 |
| H148 | -6.1148260000  | -27.6869660000 | 21.0789410000 |
| H149 | -3.1199440000  | -26.9906330000 | 20.9868160000 |
| H150 | -4.1636520000  | -27.1732790000 | 19.5659770000 |
| H151 | -3.8435900000  | -28.5706290000 | 20.6062300000 |
| H152 | -5.9157960000  | -27.4278950000 | 23.5407260000 |
| H153 | -4.1827260000  | -27.0809570000 | 23.3864990000 |
| H154 | -4.8250660000  | -28.6851410000 | 22.9754700000 |
| H155 | -2.7510450000  | -29.5688650000 | 22.6734350000 |
| C156 | -11.0219990000 | -37.0400010000 | 21.4210000000 |
| C157 | -10.4156210000 | -36.7150760000 | 22.7694110000 |
| O158 | -9.2334280000  | -36.9390830000 | 23.0560210000 |
| N159 | -11.2622370000 | -36.1524770000 | 23.6592860000 |
| C160 | -10.8110000000 | -35.7070010000 | 24.9629990000 |
| H161 | -10.3583070000 | -37.7096100000 | 20.8722530000 |
| H162 | -11.1664800000 | -36.1245160000 | 20.8352790000 |
| H163 | -12.2202230000 | -35.9842300000 | 23.3879240000 |
| H164 | -10.0099640000 | -34.9658160000 | 24.8645060000 |
| H165 | -11.6484180000 | -35.2443500000 | 25.4896220000 |
| H166 | -11.9911550000 | -37.5200200000 | 21.5567300000 |
| H167 | -10.4290980000 | -36.5299030000 | 25.5672210000 |
| O168 | -2.4404560000  | -30.3537330000 | 23.1598720000 |
| O169 | -3.6611920000  | -30.7214830000 | 23.8719860000 |

I<sub>PR</sub> (doublet, 0)

|     |               |                |               |
|-----|---------------|----------------|---------------|
| C1  | -0.8191190000 | -26.0152130000 | 24.4889680000 |
| C2  | -0.7603400000 | -26.8054710000 | 25.8187370000 |
| C3  | -2.1019470000 | -27.3900220000 | 26.1347010000 |
| N4  | -2.4680850000 | -28.6573030000 | 25.7095110000 |
| C5  | -3.2107210000 | -26.7683750000 | 26.6409530000 |
| C6  | -3.7739990000 | -28.7857420000 | 25.9455640000 |
| N7  | -4.2722910000 | -27.6494920000 | 26.4950980000 |
| C8  | -7.7229490000 | -24.0381280000 | 24.0958730000 |
| C9  | -7.4721070000 | -24.0610260000 | 25.6125720000 |
| C10 | -7.2298170000 | -25.4494990000 | 26.1439990000 |
| C11 | -8.2630820000 | -26.3409750000 | 26.4869750000 |



|      |               |                |               |
|------|---------------|----------------|---------------|
| C12  | -5.9322080000 | -25.9460410000 | 26.1799600000 |
| C13  | -7.9989640000 | -27.6544610000 | 26.8515620000 |
| C14  | -5.6468380000 | -27.2556380000 | 26.5558170000 |
| C15  | -6.6713510000 | -28.1998730000 | 26.9036940000 |
| O16  | -6.4112040000 | -29.4187760000 | 27.2186600000 |
| C17  | 2.9849900000  | -33.3739660000 | 28.0369610000 |
| C18  | 3.1934080000  | -33.5898930000 | 26.5400660000 |
| O19  | 2.7627050000  | -34.5794790000 | 25.9547690000 |
| C20  | 1.5147700000  | -33.6564480000 | 28.4069790000 |
| C21  | 0.5403560000  | -32.7201160000 | 27.7515830000 |
| N22  | -0.4558160000 | -32.0824320000 | 28.4709640000 |
| C23  | 0.3298060000  | -32.3227040000 | 26.4513510000 |
| C24  | -1.2134430000 | -31.3476350000 | 27.6127890000 |
| N25  | -0.7525520000 | -31.4692080000 | 26.3824600000 |
| N26  | 3.8700460000  | -32.5891270000 | 25.9036810000 |
| C27  | 4.2949770000  | -32.6900140000 | 24.5159890000 |
| C28  | 4.0477420000  | -31.3865870000 | 23.7266810000 |
| C29  | 2.6029840000  | -31.0376680000 | 23.5808930000 |
| N30  | 1.7557510000  | -31.6676770000 | 22.6781250000 |
| C31  | 1.7900000000  | -30.1768820000 | 24.2729430000 |
| C32  | 0.4987350000  | -31.1728730000 | 22.8497310000 |
| N33  | 0.4904570000  | -30.2704580000 | 23.8154350000 |
| C34  | -6.9586110000 | -37.9014780000 | 20.4976350000 |
| C35  | -5.7391420000 | -37.5953830000 | 21.3851260000 |
| C36  | -5.7730480000 | -36.2264370000 | 21.9889550000 |
| N37  | -6.8343120000 | -35.7702980000 | 22.7555850000 |
| C38  | -4.8793040000 | -35.1871600000 | 21.9610480000 |
| C39  | -6.5644160000 | -34.5088730000 | 23.1509110000 |
| N40  | -5.3826260000 | -34.1281470000 | 22.6895310000 |
| Cu41 | -1.2482950000 | -30.0133080000 | 24.8982110000 |
| Fe42 | -4.4317590000 | -32.3970180000 | 23.1586230000 |
| C43  | -1.6203610000 | -33.5588610000 | 21.5440290000 |
| C44  | -3.4555240000 | -33.9497030000 | 26.0312580000 |
| C45  | -7.2244330000 | -31.2054770000 | 24.7711870000 |
| C46  | -5.5270920000 | -31.0201660000 | 20.2462520000 |
| N47  | -6.0589860000 | -31.3456460000 | 22.6147120000 |
| C48  | -1.7698940000 | -33.8861690000 | 22.8945470000 |
| C49  | -0.8491310000 | -34.6667790000 | 23.6505970000 |
| C50  | -1.3690290000 | -34.7889940000 | 24.9250050000 |
| C51  | -2.6175260000 | -34.0594290000 | 24.9232520000 |
| C52  | -0.6669060000 | -35.4288370000 | 26.0300640000 |
| O53  | -1.0521020000 | -35.5167620000 | 27.1916430000 |
| N54  | -5.1995870000 | -32.5454060000 | 25.0313490000 |
| C55  | -4.6543890000 | -33.2669940000 | 26.0652810000 |
| C56  | -5.5411700000 | -33.2493820000 | 27.2179160000 |
| C57  | -6.6336610000 | -32.5120700000 | 26.8600810000 |
| C58  | -6.3835730000 | -32.0467950000 | 25.4972590000 |
| C59  | -5.2573100000 | -33.9572140000 | 28.5085200000 |
| N60  | -2.8366870000 | -33.5227580000 | 23.6872010000 |
| C61  | -7.0496780000 | -30.8623070000 | 23.4398230000 |

|      |               |                |               |
|------|---------------|----------------|---------------|
| C62  | -7.9575410000 | -30.0025940000 | 22.6956770000 |
| C63  | -7.5371880000 | -30.0391860000 | 21.3869780000 |
| C64  | -6.3269710000 | -30.8544690000 | 21.3675840000 |
| C65  | -9.1008000000 | -29.2349130000 | 23.2789500000 |
| C66  | -8.1441620000 | -29.4534050000 | 20.1924650000 |
| C67  | -8.7574230000 | -28.2631800000 | 20.1123870000 |
| N68  | -3.7133640000 | -32.3119320000 | 21.2721330000 |
| C69  | -4.3039690000 | -31.6813430000 | 20.2150670000 |
| C70  | -3.4661010000 | -31.7789460000 | 19.0266400000 |
| C71  | -2.3665610000 | -32.4890370000 | 19.4049130000 |
| C72  | -2.5250050000 | -32.8202290000 | 20.8021450000 |
| C73  | -3.7865730000 | -31.1898140000 | 17.6875360000 |
| C74  | -7.9094370000 | -32.3274730000 | 27.6559910000 |
| O75  | -8.4843800000 | -31.0478130000 | 27.5120870000 |
| C76  | -8.9405970000 | -33.3934400000 | 27.2215810000 |
| H77  | 0.0887960000  | -35.0695460000 | 23.2859340000 |
| H78  | -1.5174130000 | -32.7719610000 | 18.7934740000 |
| H79  | -1.2256370000 | -26.6696950000 | 23.7075370000 |
| H80  | -0.0289320000 | -27.6190810000 | 25.7339610000 |
| H81  | -0.4241820000 | -26.1448690000 | 26.6286510000 |
| H82  | -8.5406060000 | -24.7300490000 | 23.8736360000 |
| H83  | -6.6233290000 | -23.4042070000 | 25.8574810000 |
| H84  | -8.3536240000 | -23.6064030000 | 26.0859910000 |
| H85  | 3.6382250000  | -34.0749130000 | 28.5707510000 |
| H86  | 1.2704470000  | -34.6857530000 | 28.1221370000 |
| H87  | 1.4038640000  | -33.5947300000 | 29.4965340000 |
| H88  | 3.7219290000  | -33.5155750000 | 24.0857350000 |
| H89  | 4.5603380000  | -30.5542770000 | 24.2252670000 |
| H90  | 4.5234460000  | -31.4879230000 | 22.7411610000 |
| H91  | -7.8815970000 | -37.8602330000 | 21.0852830000 |
| H92  | -5.6734940000 | -38.3518830000 | 22.1804050000 |
| H93  | -4.8164110000 | -37.6820140000 | 20.8002170000 |
| H94  | -5.9611950000 | -33.6578870000 | 29.2901380000 |
| H95  | -4.2442160000 | -33.7358020000 | 28.8658200000 |
| H96  | -5.3245800000 | -35.0476490000 | 28.3983710000 |
| H97  | -9.8636540000 | -29.0429250000 | 22.5173320000 |
| H98  | -8.7609240000 | -28.2613580000 | 23.6561320000 |
| H99  | -9.5636670000 | -29.7605270000 | 24.1201760000 |
| H100 | -2.9949050000 | -31.4098970000 | 16.9643020000 |
| H101 | -3.8965520000 | -30.0991230000 | 17.7450490000 |
| H102 | -4.7284800000 | -31.5852260000 | 17.2859210000 |
| H103 | -7.6644690000 | -32.5164150000 | 28.7166540000 |
| H104 | -8.4712730000 | -34.3838040000 | 27.1898840000 |
| H105 | -9.2988650000 | -33.1433560000 | 26.2162110000 |
| H106 | -9.8097210000 | -33.4560390000 | 27.8941990000 |
| H107 | -0.7330600000 | -33.9283290000 | 21.0365730000 |
| H108 | -5.8581720000 | -30.5508250000 | 19.3269310000 |
| H109 | -8.0834430000 | -30.0677600000 | 19.2924100000 |
| H110 | -8.7914390000 | -27.5611550000 | 20.9382670000 |
| H111 | -9.1984790000 | -27.9362140000 | 19.1736790000 |

|      |                |                |               |
|------|----------------|----------------|---------------|
| H112 | -8.0671300000  | -30.7963960000 | 25.3101630000 |
| H113 | -3.1223790000  | -34.4596670000 | 26.9262120000 |
| H114 | 0.3313490000   | -35.8258320000 | 25.7497980000 |
| H115 | -7.2158930000  | -33.9037280000 | 23.7611010000 |
| H116 | -7.6931760000  | -36.2844090000 | 22.9631580000 |
| H117 | -3.9168960000  | -35.1252170000 | 21.4796330000 |
| H118 | -0.3708050000  | -31.4969640000 | 22.2977310000 |
| H119 | 2.0200110000   | -32.3750110000 | 22.0077740000 |
| H120 | 2.0484280000   | -29.5128690000 | 25.0848870000 |
| H121 | 4.2430310000   | -31.8314300000 | 26.4583300000 |
| H122 | 0.8626040000   | -32.6104470000 | 25.5601940000 |
| H123 | -0.5801560000  | -32.1608850000 | 29.4668030000 |
| H124 | -2.0591200000  | -30.7420730000 | 27.9049420000 |
| H125 | -4.3810310000  | -29.6431220000 | 25.7100050000 |
| H126 | -3.3450010000  | -25.7914010000 | 27.0761170000 |
| H127 | -5.1168730000  | -25.3035770000 | 25.8573860000 |
| H128 | -8.8134500000  | -28.3242650000 | 27.1160790000 |
| H129 | -9.2965240000  | -25.9955500000 | 26.4571880000 |
| H130 | -7.7270670000  | -30.3793510000 | 27.5027600000 |
| H131 | 3.2712870000   | -32.3595350000 | 28.3144470000 |
| H132 | -1.4216850000  | -25.2220750000 | 24.5787510000 |
| H133 | 0.0891230000   | -25.7121660000 | 24.1996900000 |
| H134 | -8.0231420000  | -23.1343920000 | 23.7901710000 |
| N135 | -6.6114480000  | -24.4906980000 | 23.2825680000 |
| H136 | 5.2635540000   | -32.9382510000 | 24.4990040000 |
| H137 | -7.0373990000  | -37.1740760000 | 19.6815680000 |
| H138 | -6.8771230000  | -38.9030300000 | 20.0604990000 |
| H139 | -4.7054280000  | -25.0766770000 | 21.7374880000 |
| C140 | -5.5860380000  | -25.6410140000 | 21.3981090000 |
| C141 | -6.8205250000  | -25.2812180000 | 22.1954630000 |
| O142 | -7.9359760000  | -25.6921040000 | 21.8761980000 |
| C143 | -5.2918560000  | -27.1589390000 | 21.4805070000 |
| C144 | -4.1160450000  | -27.5422780000 | 20.5725570000 |
| C145 | -5.0299120000  | -27.6096080000 | 22.9231470000 |
| H146 | -5.6750930000  | -24.1848560000 | 23.5007820000 |
| H147 | -5.7769450000  | -25.3614710000 | 20.3554380000 |
| H148 | -6.1873360000  | -27.6733260000 | 21.1179280000 |
| H149 | -3.1876200000  | -27.0541710000 | 20.9023400000 |
| H150 | -4.2946810000  | -27.2489430000 | 19.5303040000 |
| H151 | -3.9557730000  | -28.6278630000 | 20.5887550000 |
| H152 | -5.8700610000  | -27.3867840000 | 23.5884760000 |
| H153 | -4.1425830000  | -27.1107850000 | 23.3401170000 |
| H154 | -4.8609930000  | -28.6918390000 | 22.9776840000 |
| H155 | -2.7940360000  | -29.5896020000 | 22.6443960000 |
| C156 | -11.0219830000 | -37.0399930000 | 21.4210190000 |
| C157 | -10.4292110000 | -36.7552990000 | 22.7835500000 |
| O158 | -9.2701620000  | -37.0559010000 | 23.0884060000 |
| N159 | -11.2648790000 | -36.1571580000 | 23.6605910000 |
| C160 | -10.8109940000 | -35.7070050000 | 24.9629860000 |
| H161 | -10.3594140000 | -37.7018320000 | 20.8629260000 |

|      |                |                |               |
|------|----------------|----------------|---------------|
| H162 | -11.1638570000 | -36.1116520000 | 20.8560910000 |
| H163 | -12.1941870000 | -35.9079900000 | 23.3545320000 |
| H164 | -10.0065980000 | -34.9697880000 | 24.8640580000 |
| H165 | -11.6456480000 | -35.2398530000 | 25.4878010000 |
| H166 | -11.9911680000 | -37.5200230000 | 21.5567250000 |
| H167 | -10.4291010000 | -36.5299070000 | 25.5672230000 |
| O168 | -2.4769940000  | -30.4496170000 | 22.9759710000 |
| O169 | -3.6462430000  | -30.8778800000 | 23.7356850000 |
